# Supplementary material for: Epidemiological trends of osteoarthritis at the global, regional, and national levels from 1990 to 2021 and projections to 2050
Source: bioRxiv or medRxiv preprint supplement (doi:10.1101/2024.06.30.24309697), 2024-07-24
Supplement: Supplementary file [file media-1.pdf]

# Epidemiological trends of osteoarthritis at the global, regional, and national levels from 1990 to 2021, with a projection from 2021 to 2050

Lichun Qiao<sup>1,2,3,#</sup>, Miaoqian Li<sup>1,2,3,#</sup>, Feidan Deng<sup>1,2,3</sup>, Xinyue Wen<sup>1,2,3</sup>, Jun Wang<sup>4</sup>, Huan Deng<sup>1,2,3</sup>, Zhaowei Xue<sup>5</sup>, Ping Wan<sup>1,2,3</sup>, Rongqi Xiang<sup>1,2,3</sup>, Yanjun Xie<sup>1,2,3</sup>, Huifang He<sup>1,2,3</sup>, Xiangyu Fan<sup>6</sup>, Yufei Song<sup>6</sup>, Jing Han<sup>1,2,3,\*</sup>

## Affiliations

1. School of Public Health, Xi'an Jiaotong University Health Science Center, Xi'an 710061, China
2. Global Health Institute, Xi'an Jiaotong University Health Science Center, Xi'an 712000, China
3. Key Laboratory for Disease Prevention and Control and Health Promotion of Shaanxi Province, Xi'an 710061, China
4. Department of Joint Surgery, Honghui Hospital, Xi'an Jiaotong University, Xi'an 710054, China
5. School of Pharmacy, Xi'an Jiaotong University Health Science Center, Xi'an 710061, China
6. The First Affiliated Hospital, Xi'an Jiaotong University Health Science Center, Xi'an 710061, China

# Lichun Qiao and Miaoqian Li contributed equally to this work.

\* Correspondence author should be addressed to: Jing Han, professor, Xi'an Jiaotong University, Xi'an, Shaanxi, PR China. Email: [bbbishop@126.com](mailto:bbbishop@126.com) Tel: +86 02982655106.

## Email address for each co-author:

Lichun Qiao: [qlc978402409@163.com](mailto:qlc978402409@163.com) ORCID: 0000-0002-6739-0846

Miaoqian Li: [L1058427391@163.com](mailto:L1058427391@163.com) ORCID: 0009-0002-0620-6010

Feidan Deng: [dfdmnz@163.com](mailto:dfdmnz@163.com) ORCID: 0000-0001-5576-7776

Xinyue Wen: [15736116663@163.com](mailto:15736116663@163.com) ORCID: 0000-0001-6875-5467

Jun Wang: [jackey\\_886@163.com](mailto:jackey_886@163.com) ORCID: 0000-0002-2198-7401

Huan Deng: [denghuan0205@163.com](mailto:denghuan0205@163.com) ORCID: 0000-0002-4298-3581

Zhaowei Xue: [3120315108@stu.xjtu.edu.cn](mailto:3120315108@stu.xjtu.edu.cn) ORCID: 0009-0003-6372-0726

Ping Wan: [wanpingfamily@163.com](mailto:wanpingfamily@163.com) ORCID: 0009-0003-3813-5939

Rongqi Xiang: [17323475180@163.com](mailto:17323475180@163.com) ORCID: 0000-0003-0582-8926

Yanjun Xie: [I\\_Promise\\_YJ@163.com](mailto:I_Promise_YJ@163.com) ORCID: 0000-0002-4522-7909

Huifang He: [hfl545767596@163.com](mailto:hfl545767596@163.com) ORCID: 0000-0002-3671-8642

Xiangyu Fan: [18436015241@163.com](mailto:18436015241@163.com) ORCID: 0009-0009-9831-0851

Yufei Song: [15379586248@163.com](mailto:15379586248@163.com) ORCID: 0009-0009-7763-0012

Jing Han: [bbbishop@126.com](mailto:bbbishop@126.com) ORCID: 0000-0003-1460-0114

## Supplementary materials

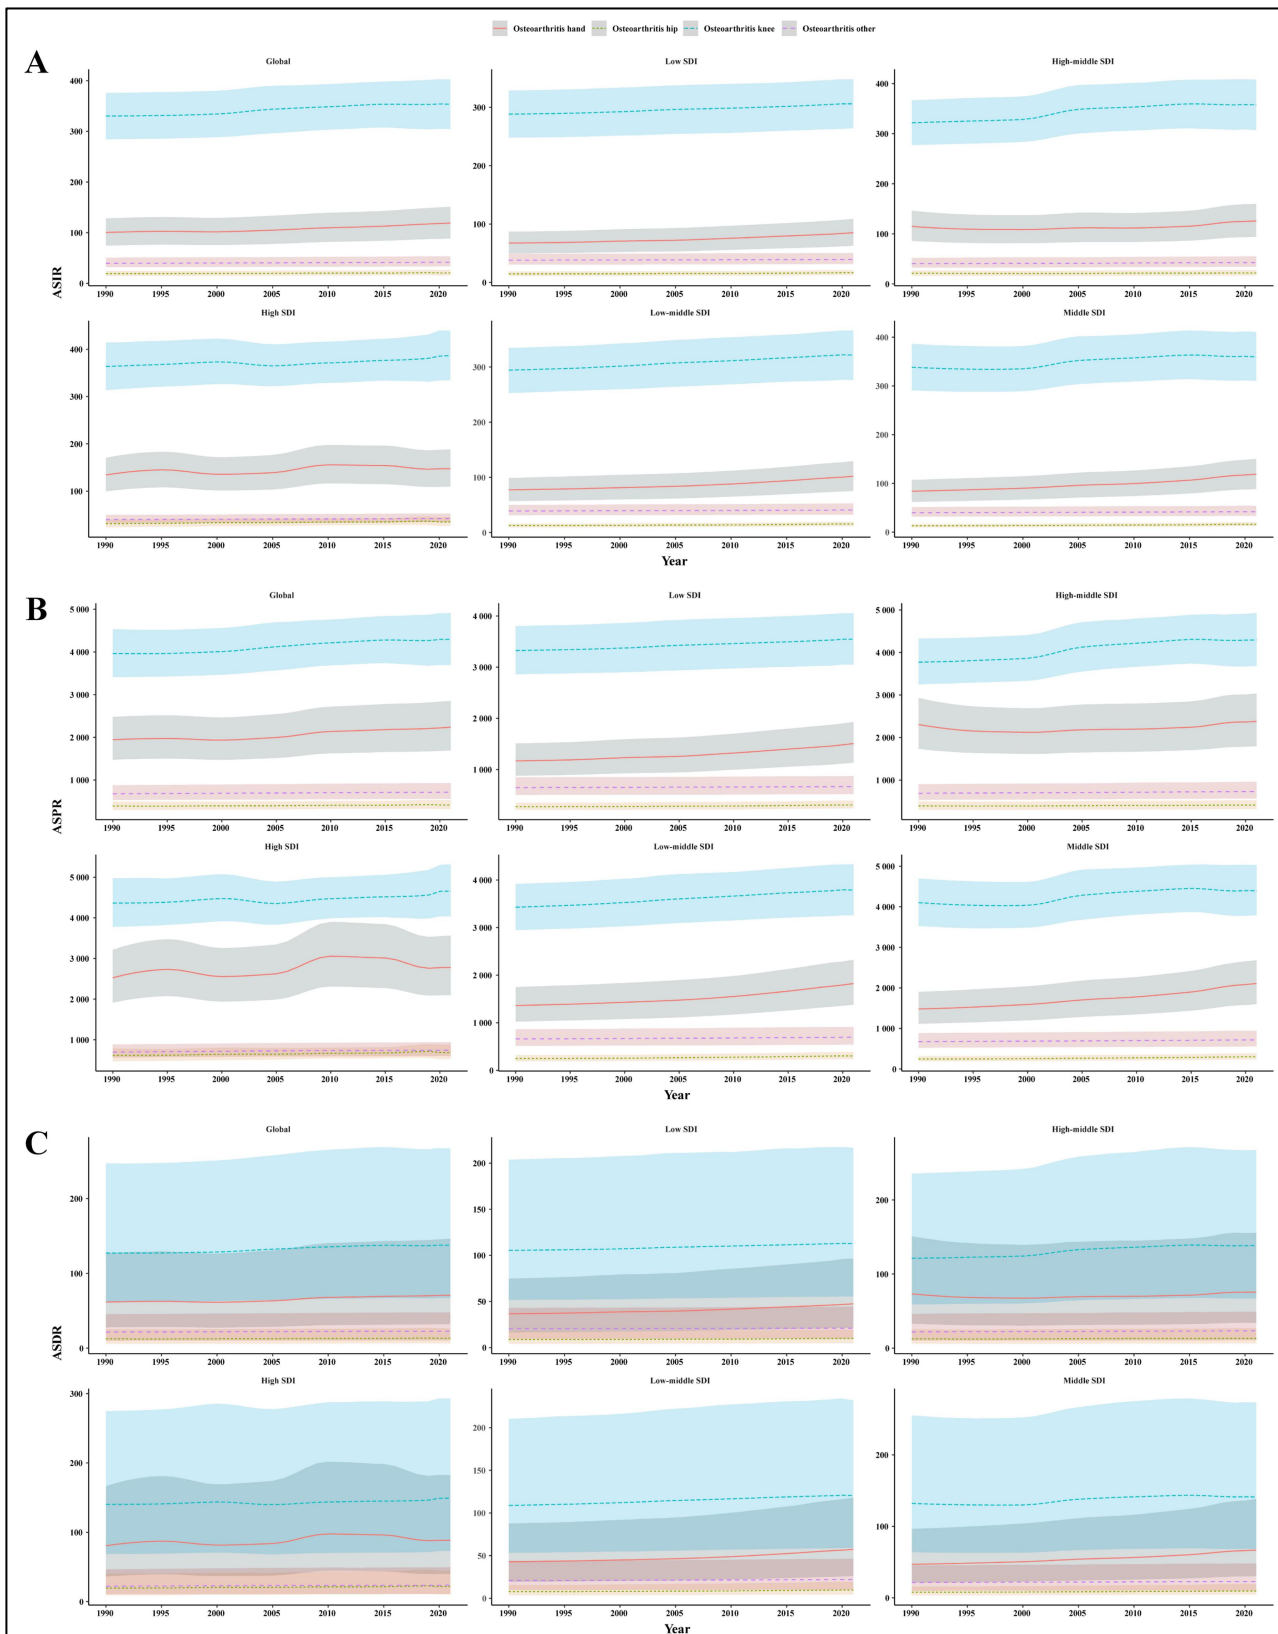

**Figure S1.** The ASRs (per 100,000 population) of four types of OA among both sexes at the global and SDI quintile levels from 1990 to 2021. **(A)** ASIR. **(B)** ASPR. **(C)** ASDR. SDI: socio-demographic index; ASRs: age-standardized rates; OA: osteoarthritis; ASIR: age-standardized incidence rate; ASPR: age-standardized prevalence rate; ASDR: age-standardized disability-adjusted life years rate.

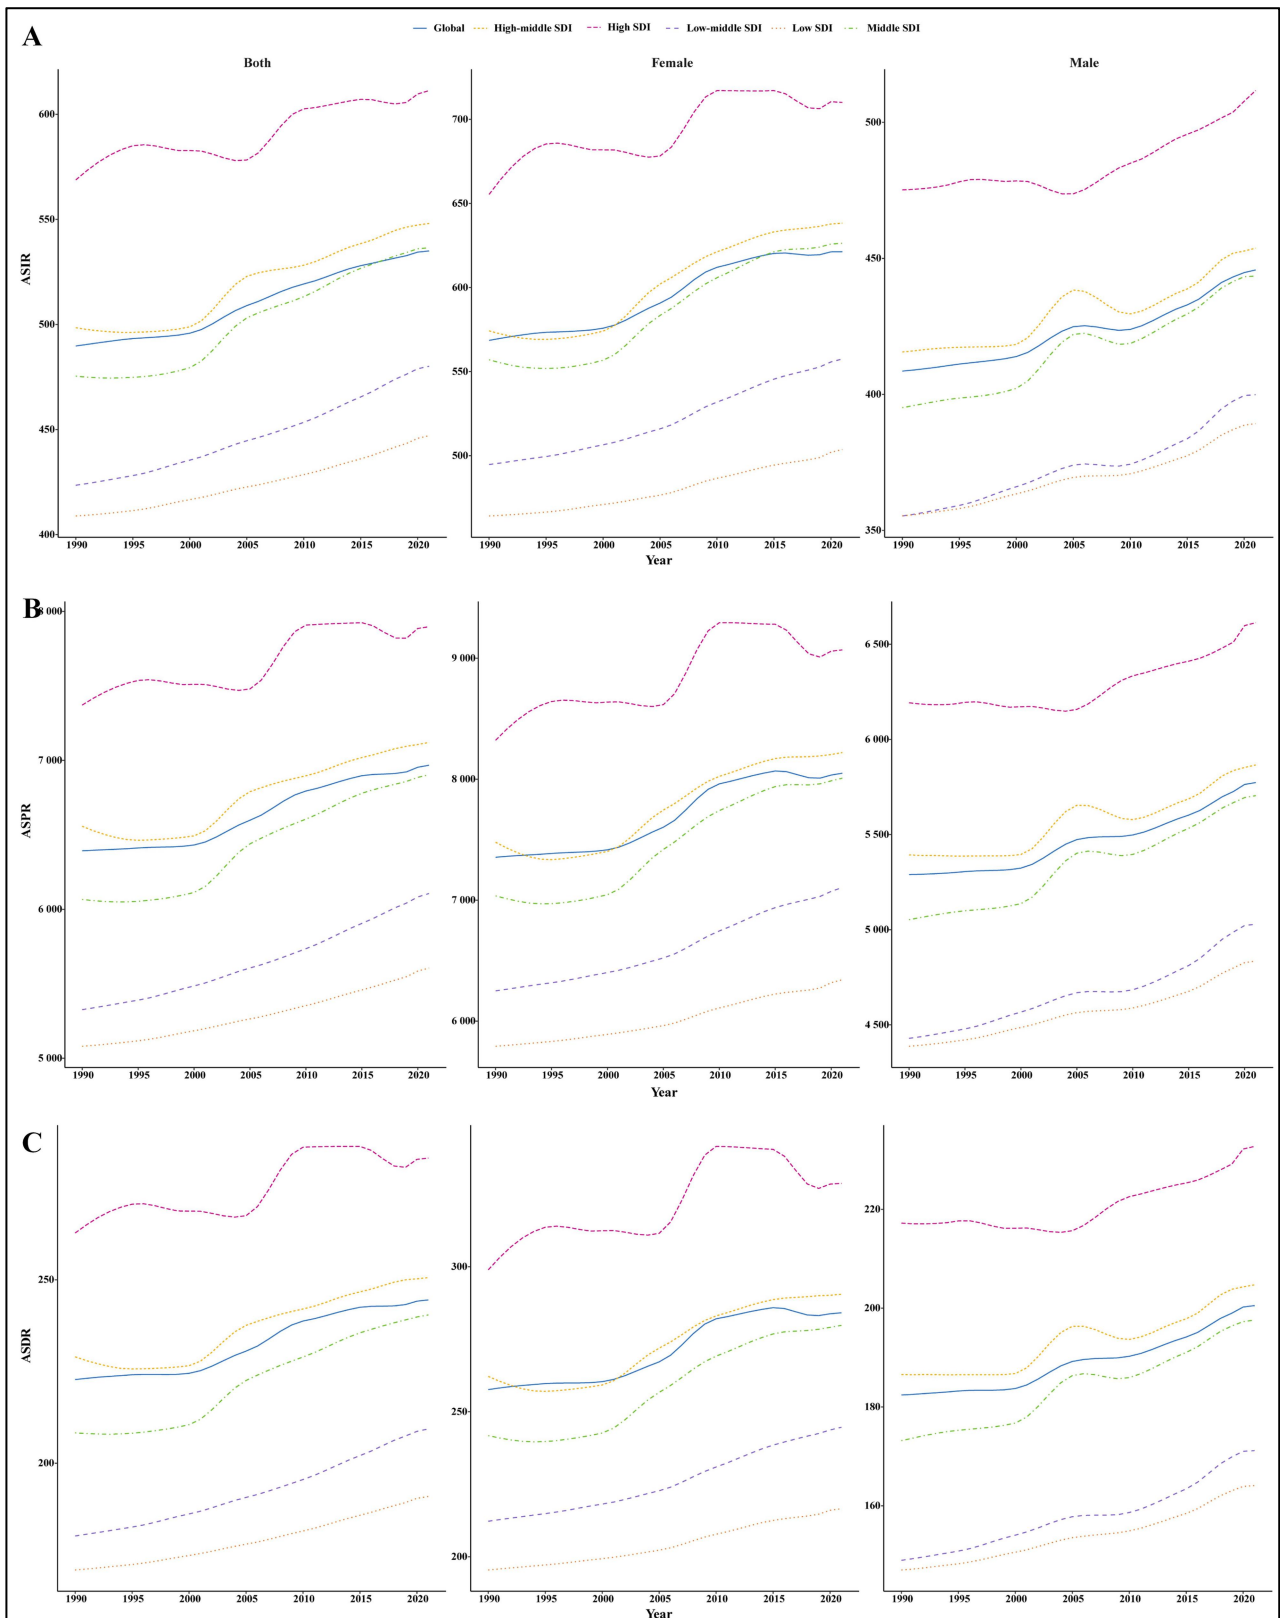

**Figure S2.** The ASRs (per 100,000 population) of OA by sex at the global and SDI quintile levels from 1990 to 2021. **(A)** ASIR. **(B)** ASPR. **(C)** ASDR. SDI: socio-demographic index; ASRs: age-standardized rates; OA: osteoarthritis; ASIR: age-standardized incidence rate; ASPR: age-standardized prevalence rate; ASDR: age-standardized disability-adjusted life years rate.

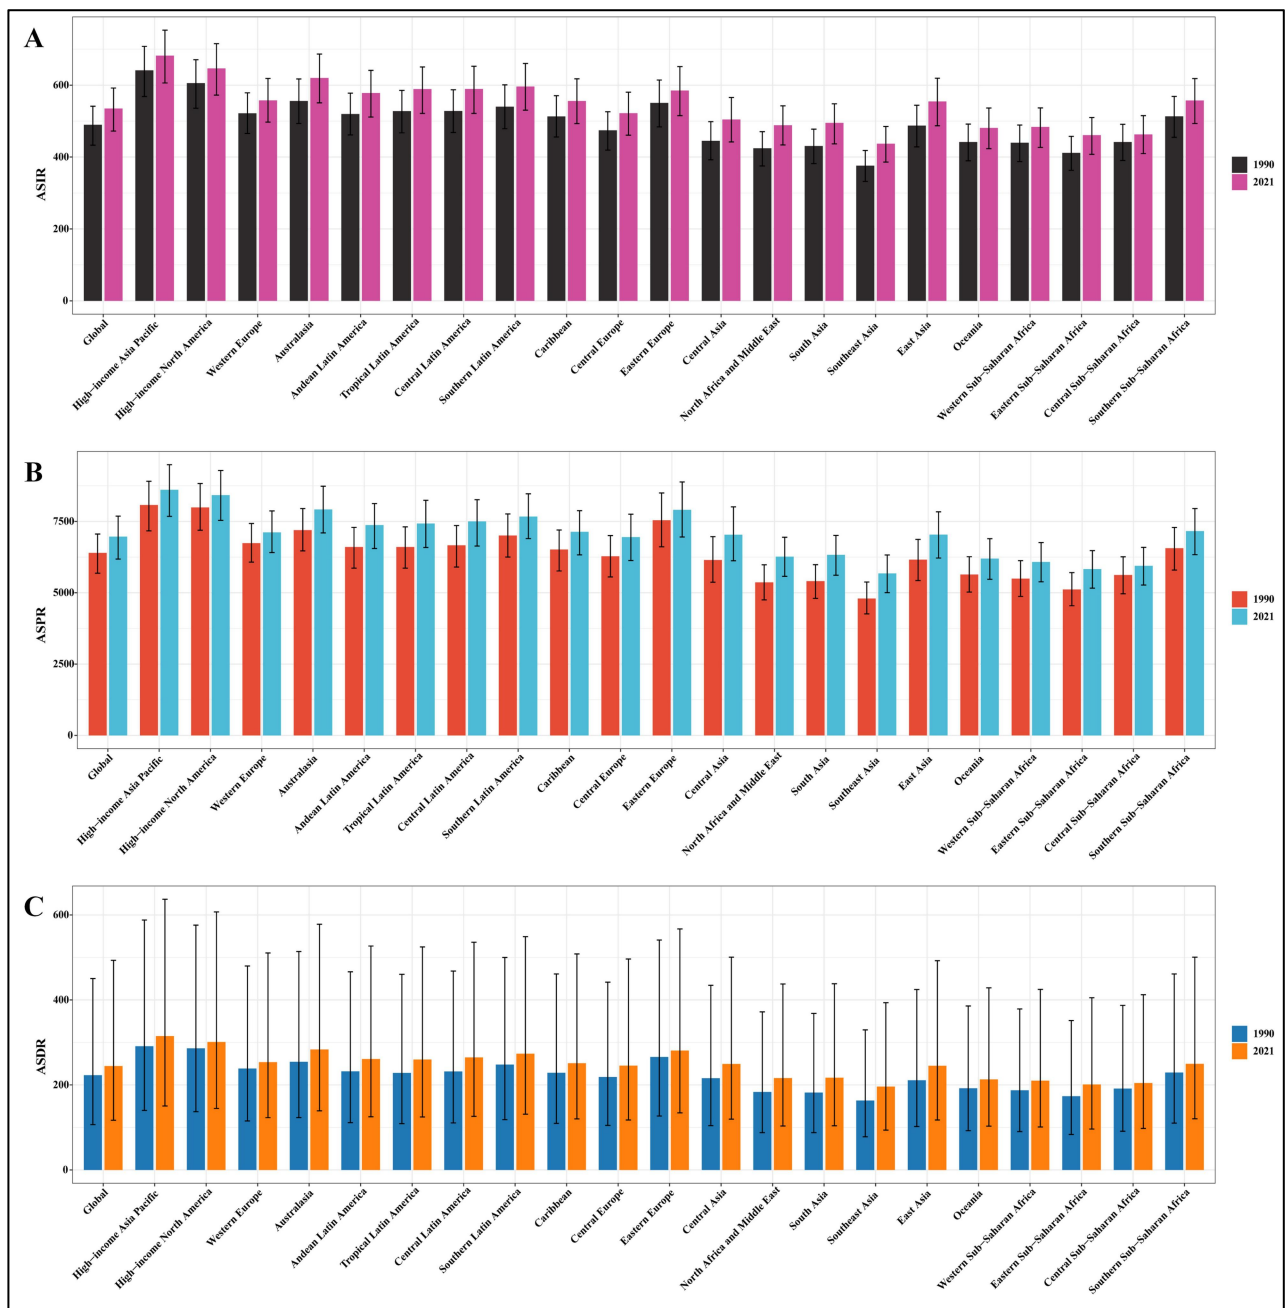

**Figure S3.** The ASRs (per 100,000 population) for OA among both sexes at the global and regional levels in 1990 and 2021. **(A)** ASIR. **(B)** ASPR. **(C)** ASDR. Error bars indicate 95% uncertainty intervals. ASRs: age-standardized rates; OA: osteoarthritis; ASIR: age-standardized incidence rate; ASPR: age-standardized prevalence rate; ASDR: age-standardized disability-adjusted life years rate.



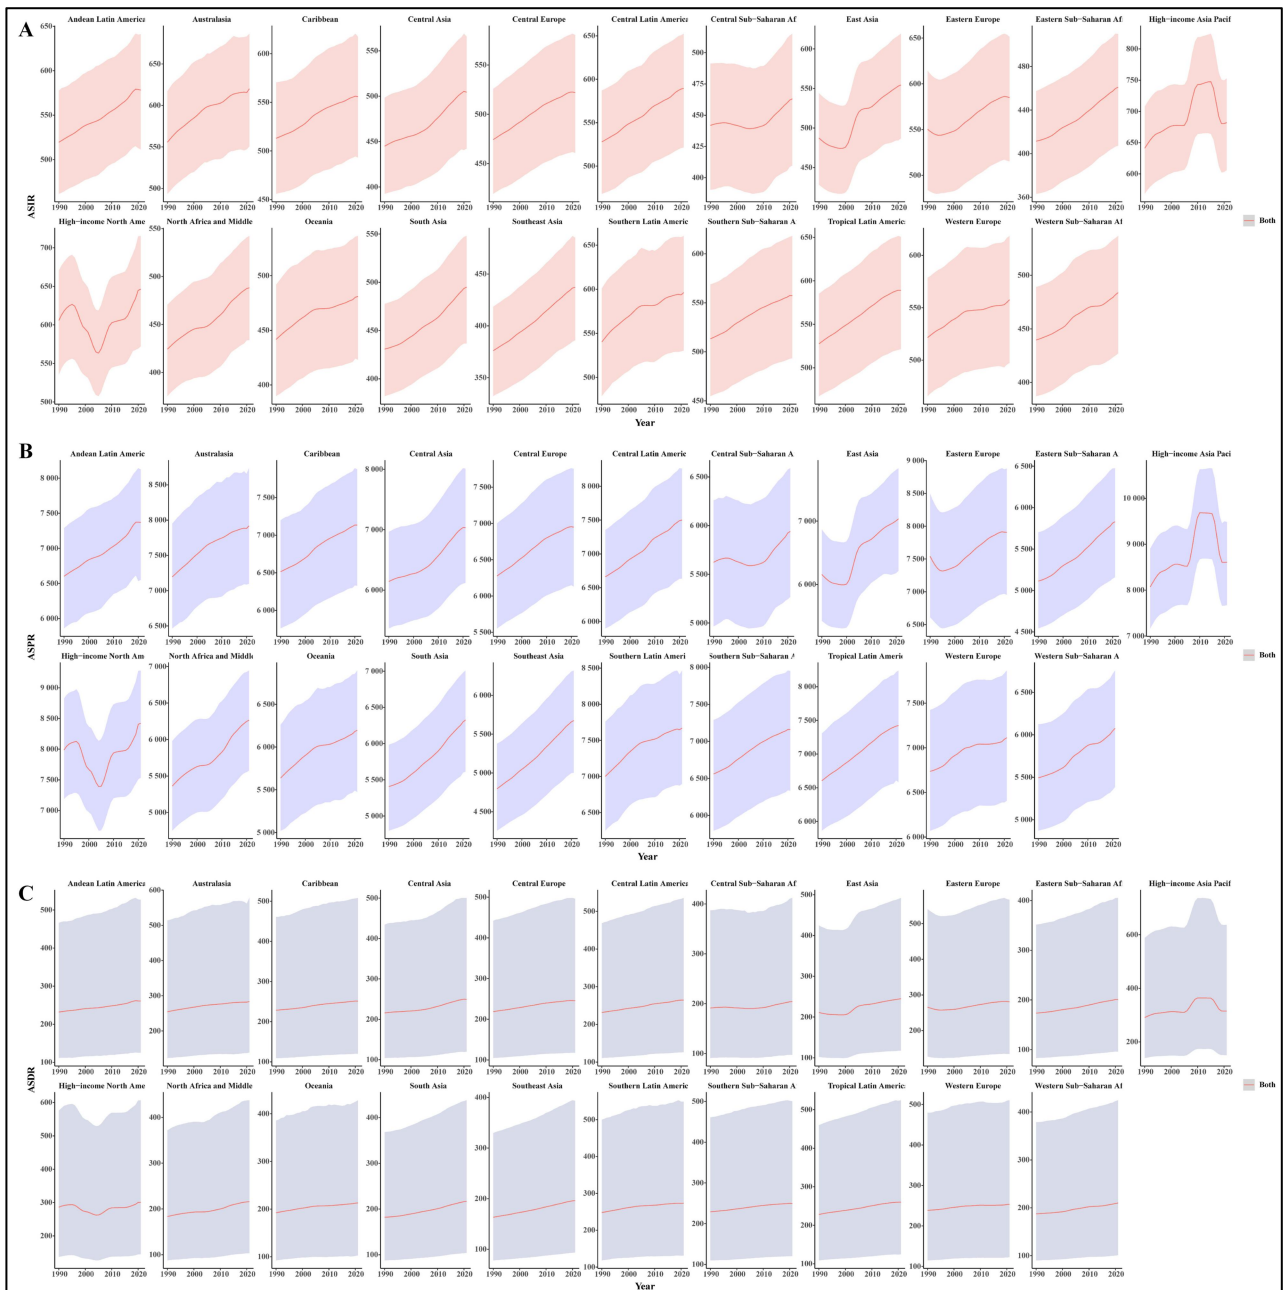

**Figure S4.** The ASRs (per 100,000 population) for OA among both sexes at the regional level from 1990 to 2021. **(A)** ASIR. **(B)** ASPR. **(C)** ASDR. ASRs: age-standardized rates; OA: osteoarthritis; ASIR: age-standardized incidence rate; ASPR: age-standardized prevalence rate; ASDR: age-standardized disability-adjusted life years rate.

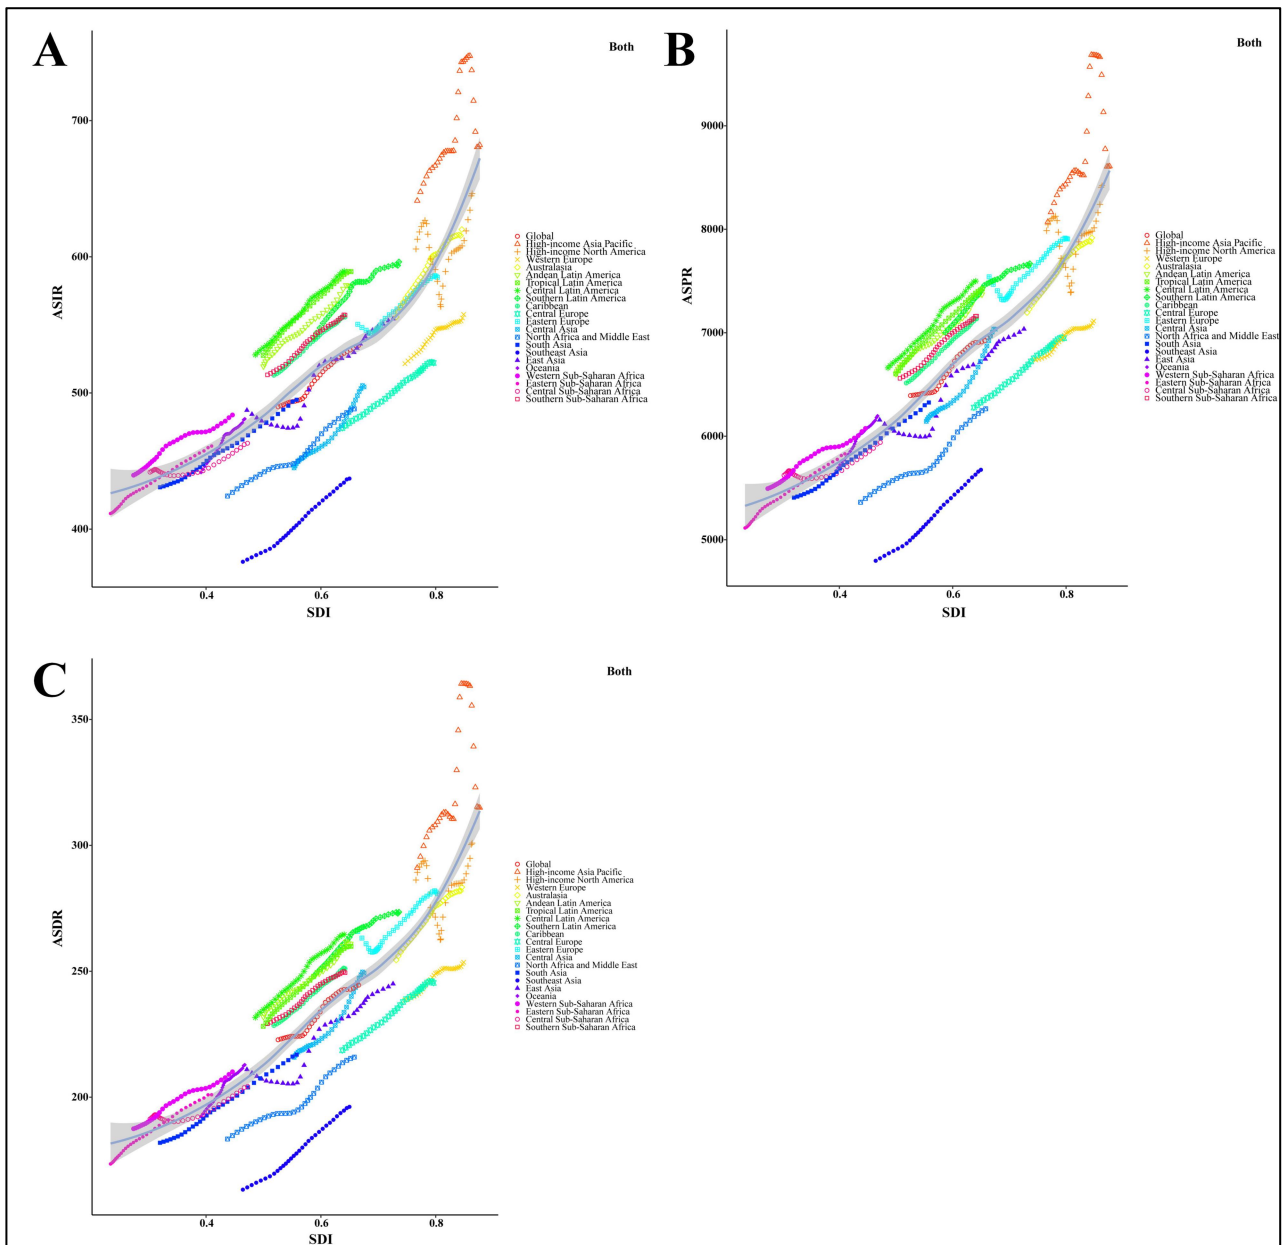

**Figure S5.** Correlation between SDI and ASRs of OA among both sexes at the global and regional levels. **(A)** ASIR,  $r=0.7794$ ,  $P<0.001$ . **(B)** ASPR,  $r=0.8353$ ,  $P<0.001$ . **(C)** ASDR,  $r=0.8479$ ,  $P<0.001$ . Colored lines show global and regional values for ASRs, and each point in a line represents one year. Expected values based on the SDI and ASRs in all locations are shown as the line. SDI: socio-demographic index; OA: osteoarthritis; ASRs: age-standardized rates; ASIR: age-standardized incidence rate; ASPR: age-standardized prevalence rate; ASDR: age-standardized disability-adjusted life years rate.

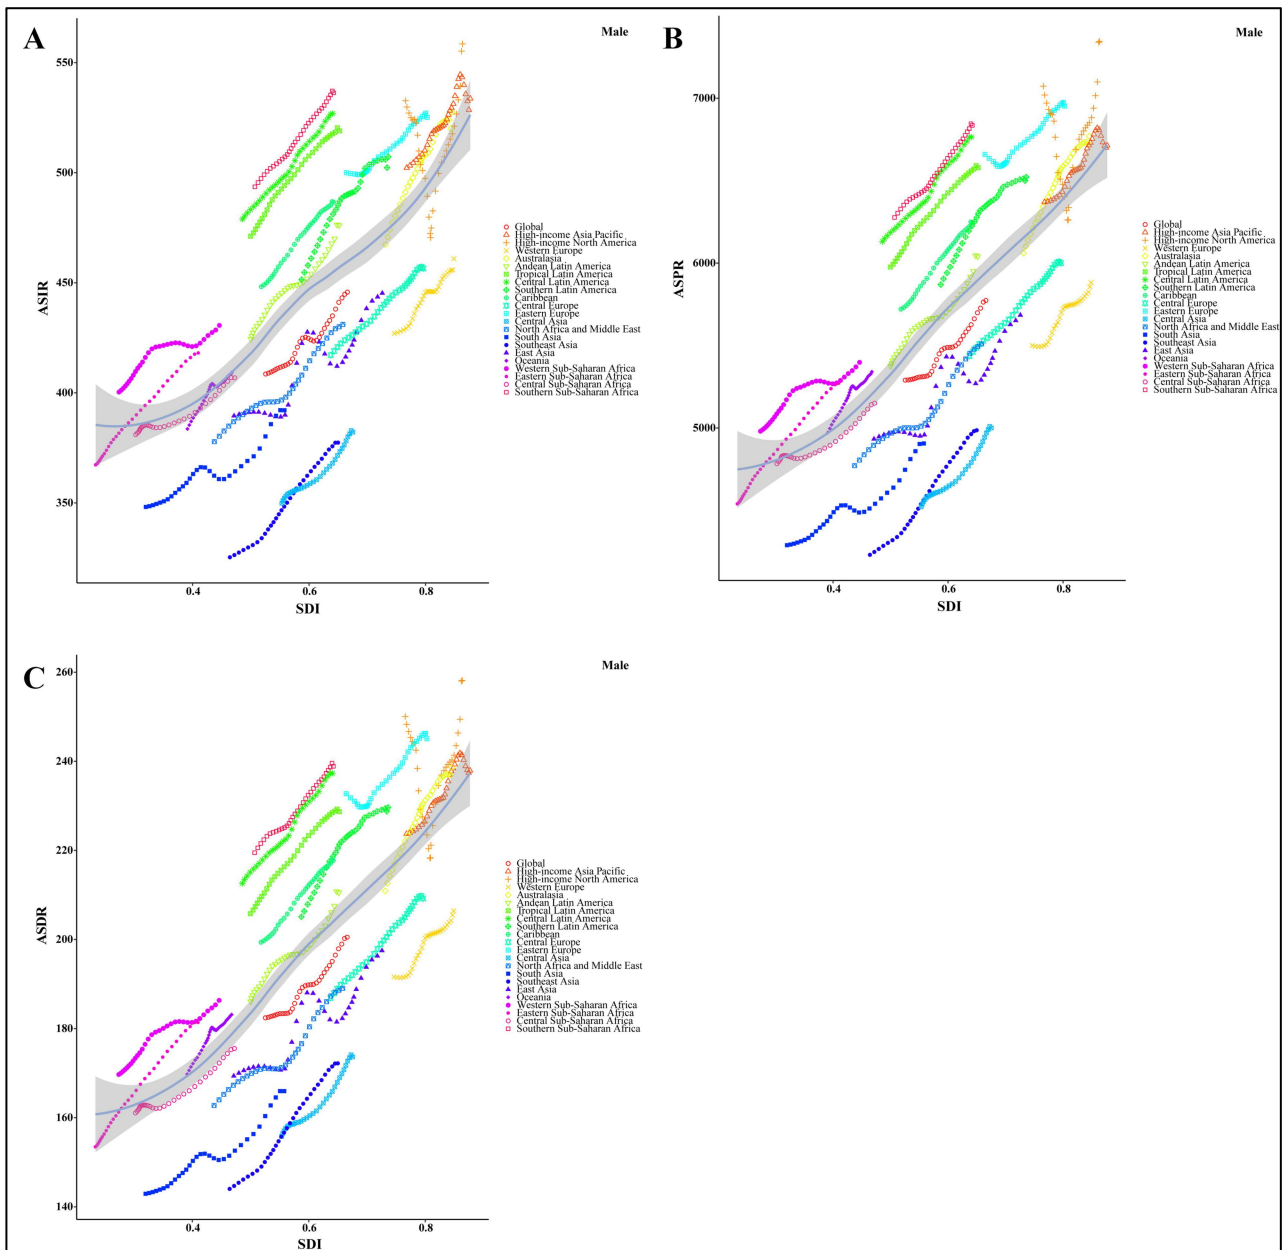

**Figure S6.** Correlation between SDI and ASRs of OA among males at the global and regional levels. (A) ASIR,  $r=0.6503$ ,  $P<0.001$ . (B) ASPR,  $r=0.6956$ ,  $P<0.001$ . (C) ASDR,  $r=0.7111$ ,  $P<0.001$ . Colored lines show global and region values for ASRs, and each point in a line represents one year. Expected values based on the SDI and ASRs in all locations are shown as the line. SDI, socio-demographic index; ASRs, age-standardized rates; OA: osteoarthritis; ASIR, age-standardized incidence rate; ASPR, age-standardized prevalence rate; ASDR, age-standardized disability-adjusted life years rate.

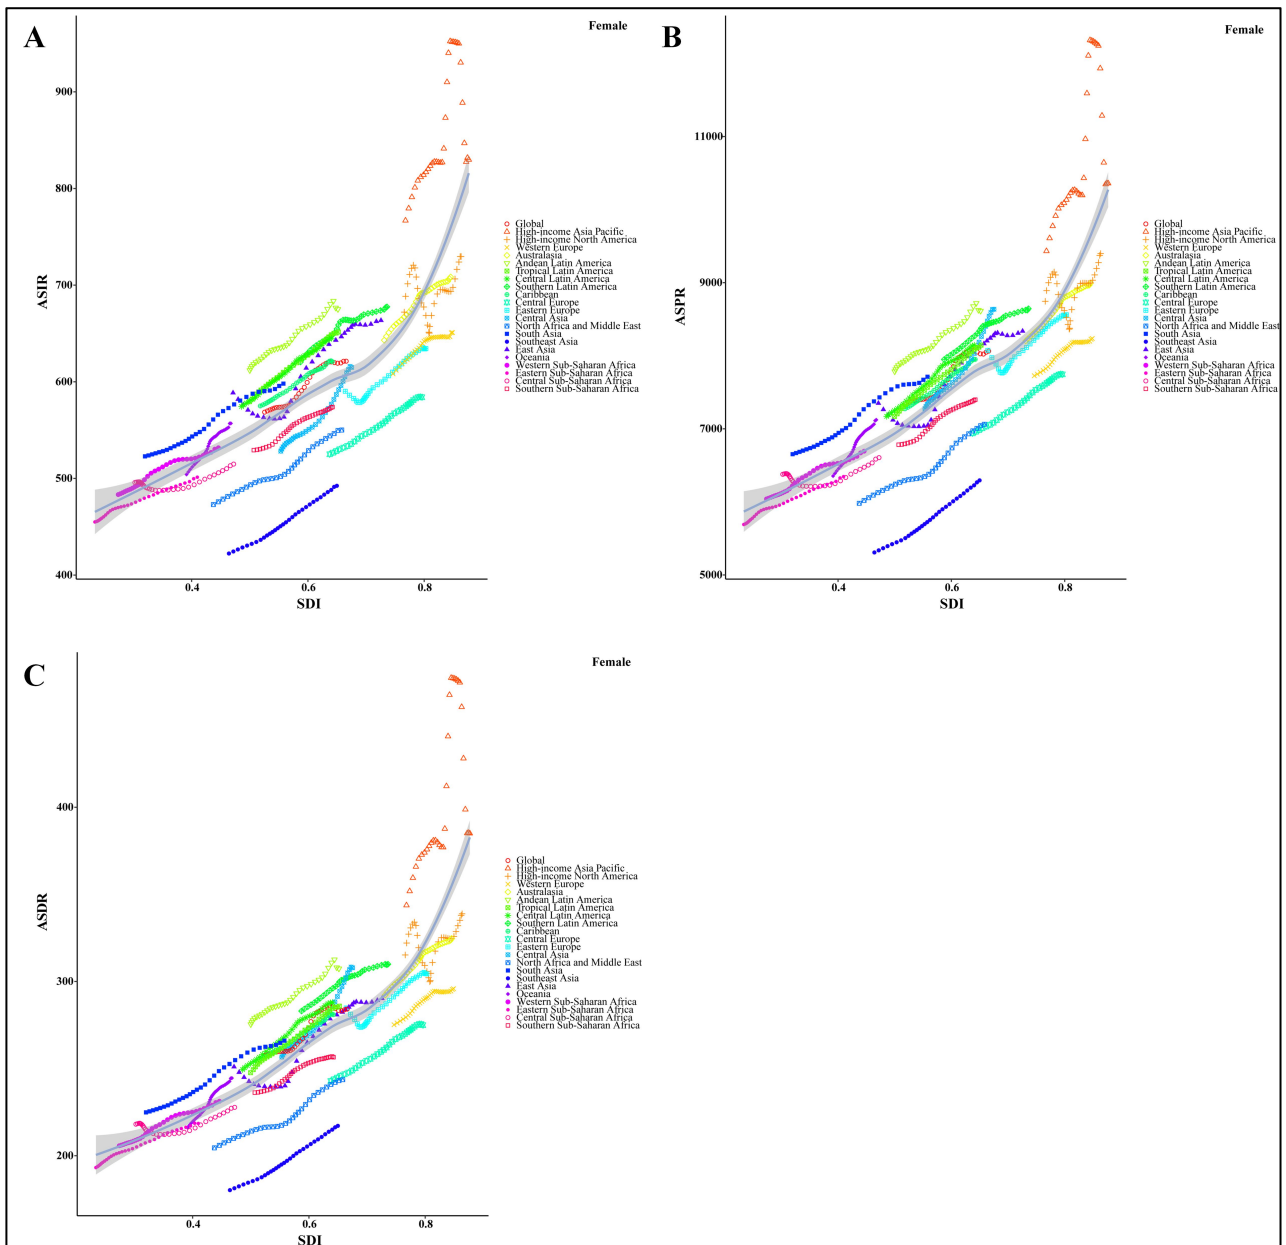

**Figure S7.** Correlation between SDI and ASRs of OA among females at the global and regional levels. **(A)** ASIR,  $r=0.7880$ ,  $P<0.001$ . **(B)** ASPR,  $r=0.8371$ ,  $P<0.001$ . **(C)** ASDR,  $r=0.8477$ ,  $P<0.001$ . Colored lines show global and region values for ASRs, and each point in a line represents one year. Expected values based on the SDI and ASRs in all locations are shown as the line. SDI, socio-demographic index; ASRs, age-standardized rates; OA: osteoarthritis; ASIR, age-standardized incidence rate; ASPR, age-standardized prevalence rate; ASDR, age-standardized disability-adjusted life years rate

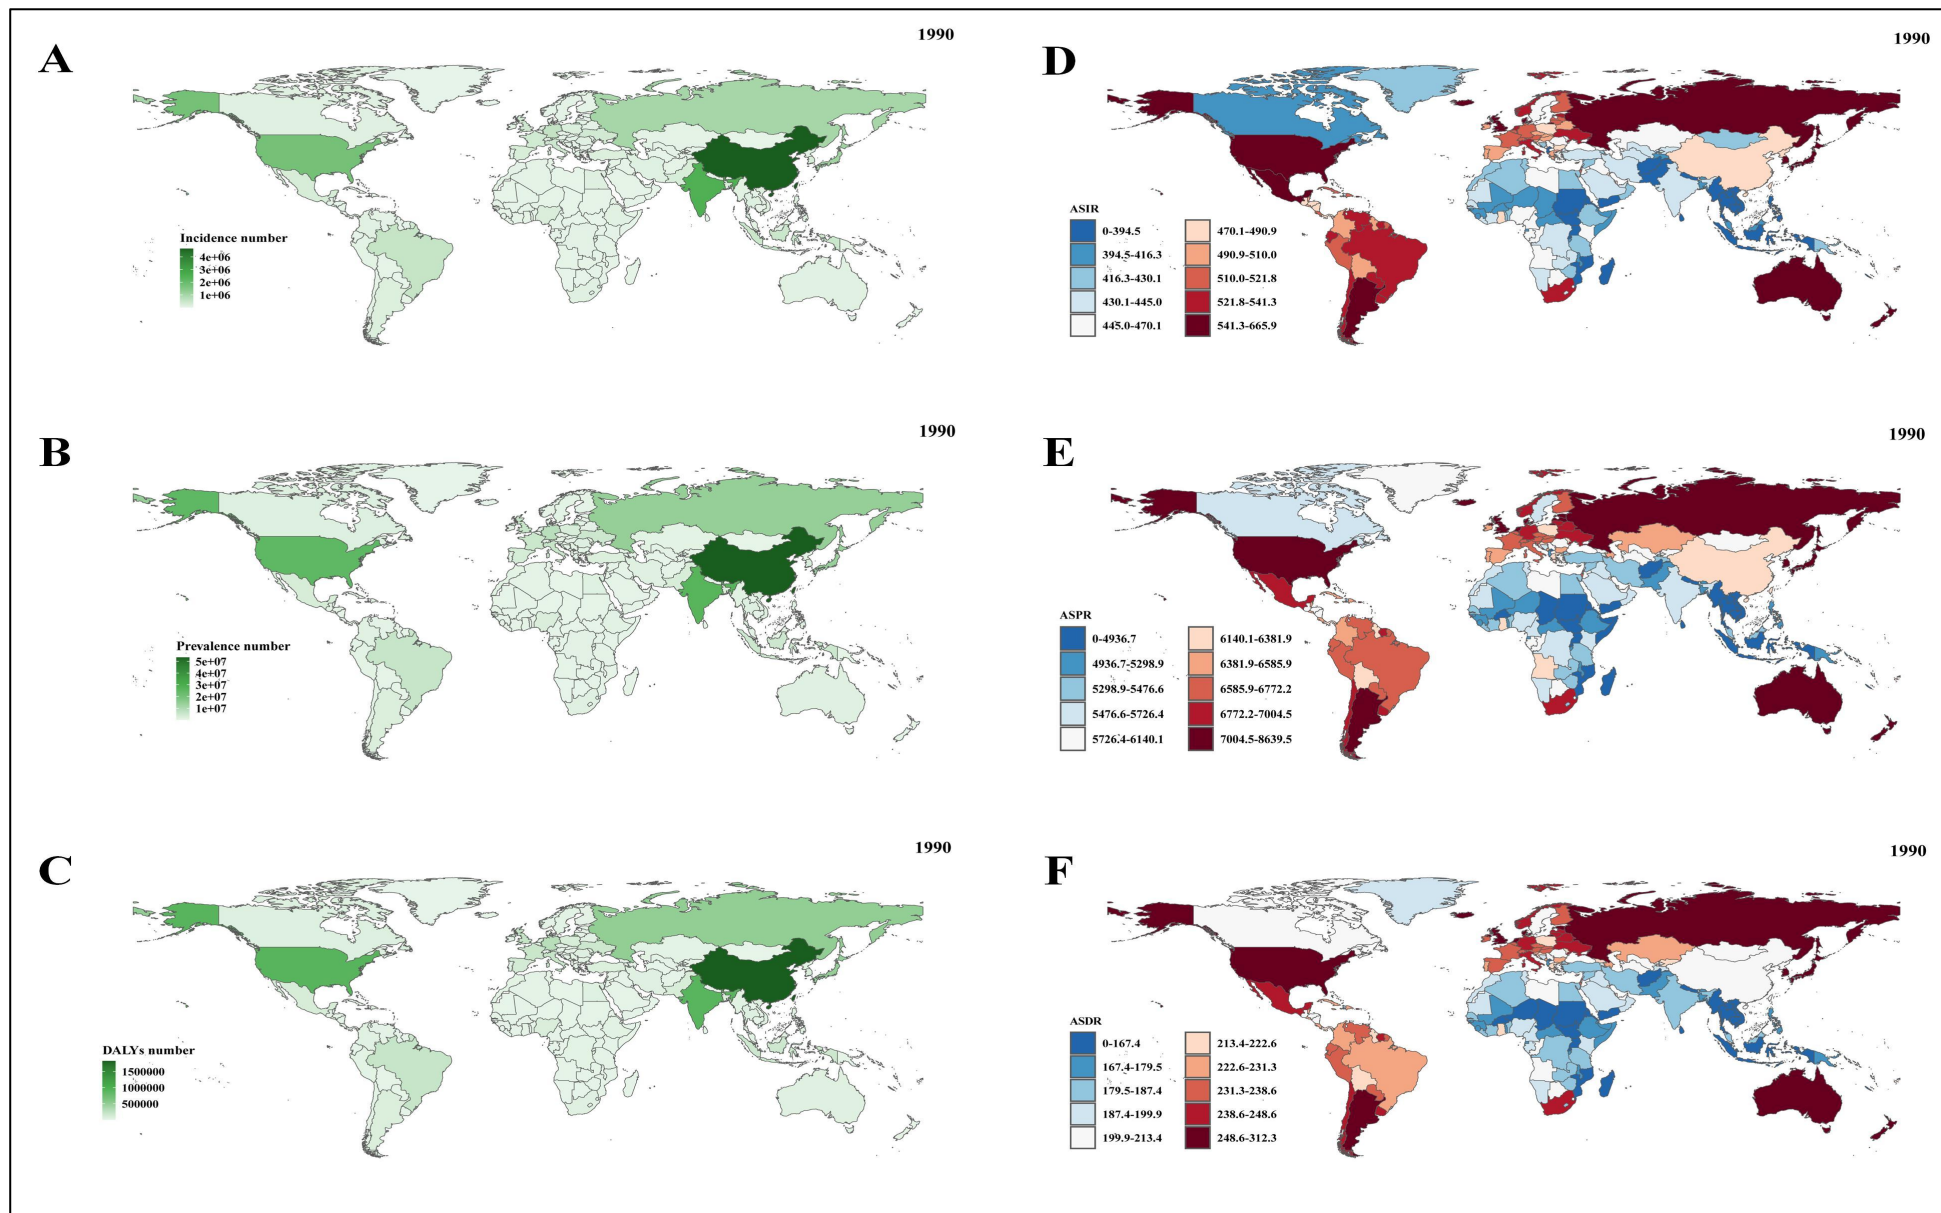

**Figure S8.** The incident case, prevalent case, DALYs, and ASRs (per 100,000 population) of OA at the national level in 1990. **(A)** Incident case. **(B)** Prevalent case. **(C)** DALYs. **(D)** ASIR. **(E)** ASPR. **(F)** ASDR. OA: osteoarthritis; DALYs: disability-adjusted life years rate; ASRs: age-standardized rates; ASIR: age-standardized incidence rate; ASPR: age-standardized prevalence rate; ASDR: age-standardized disability-adjusted life years rate.



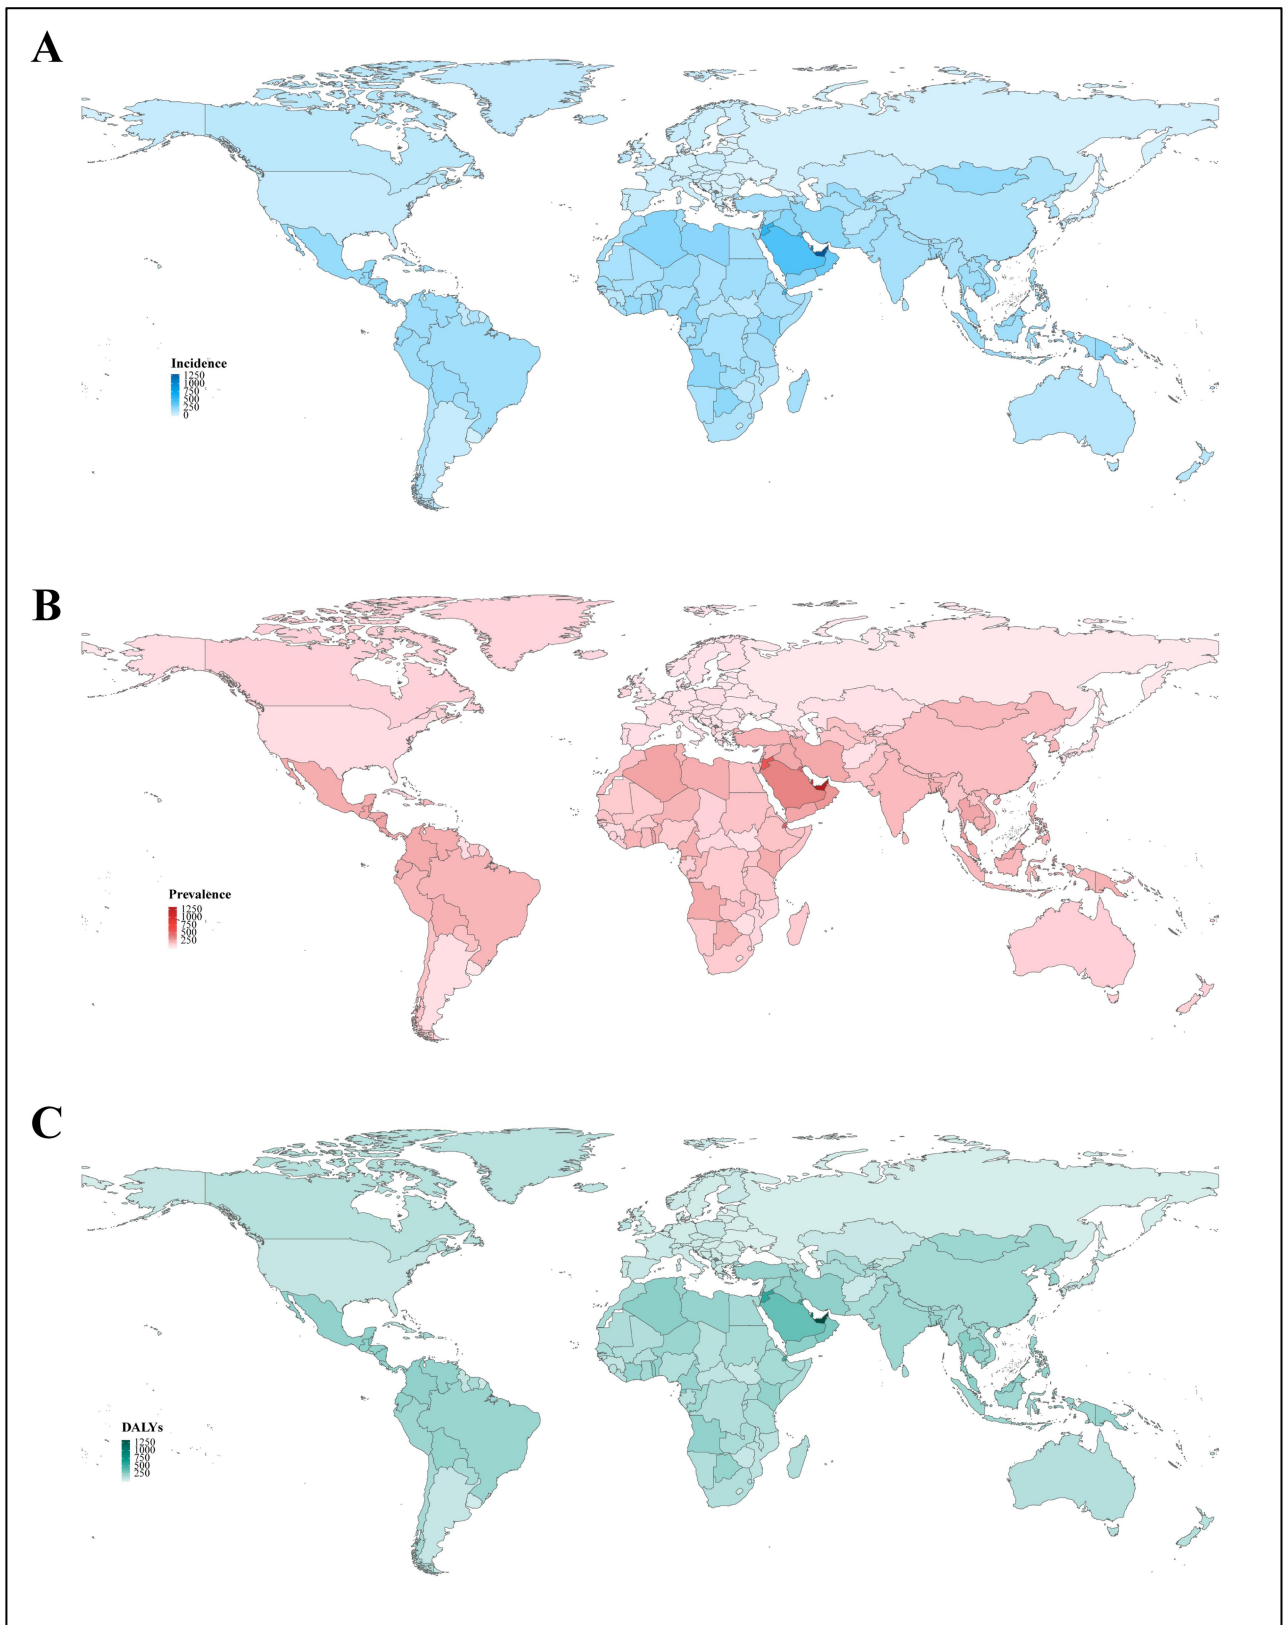

**Figure S9.** The changes in incident cases, prevalent cases, and DALYs of OA at the national level from 1990 to 2021. **(A)** Incident case. **(B)** Prevalent case. **(C)** DALYs. OA: osteoarthritis; DALYs: disability-adjusted life years rate.

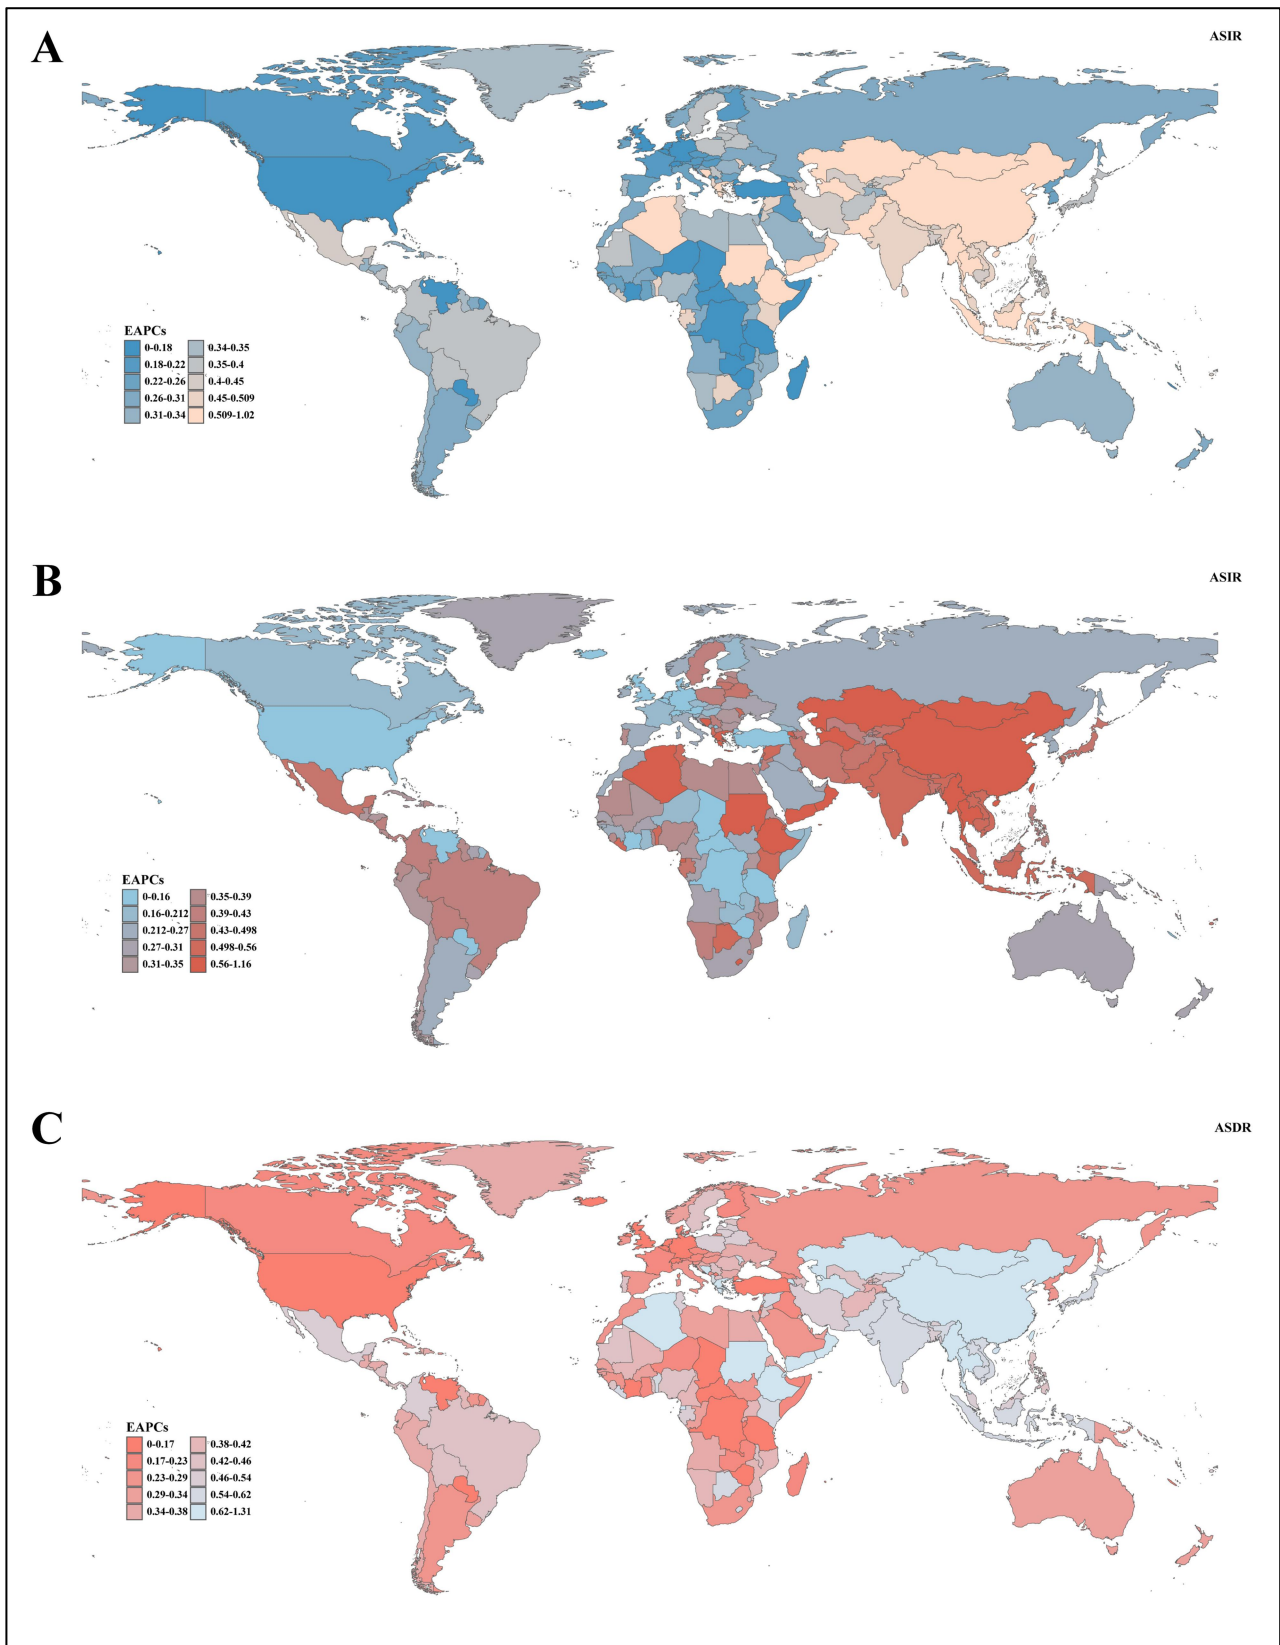

**Figure S10.** The EAPC of ASRs of OA at the national level from 1990 and 2021. **(A)** ASIR. **(B)** ASPR. **(C)** ASDR. EAPC: estimated annual percentage change; OA: osteoarthritis; DALYs: disability-adjusted life years rate; ASRs: age-standardized rates; ASIR: age-standardized incidence rate; ASPR: age-standardized prevalence rate; ASDR: age-standardized disability-adjusted life years rate.



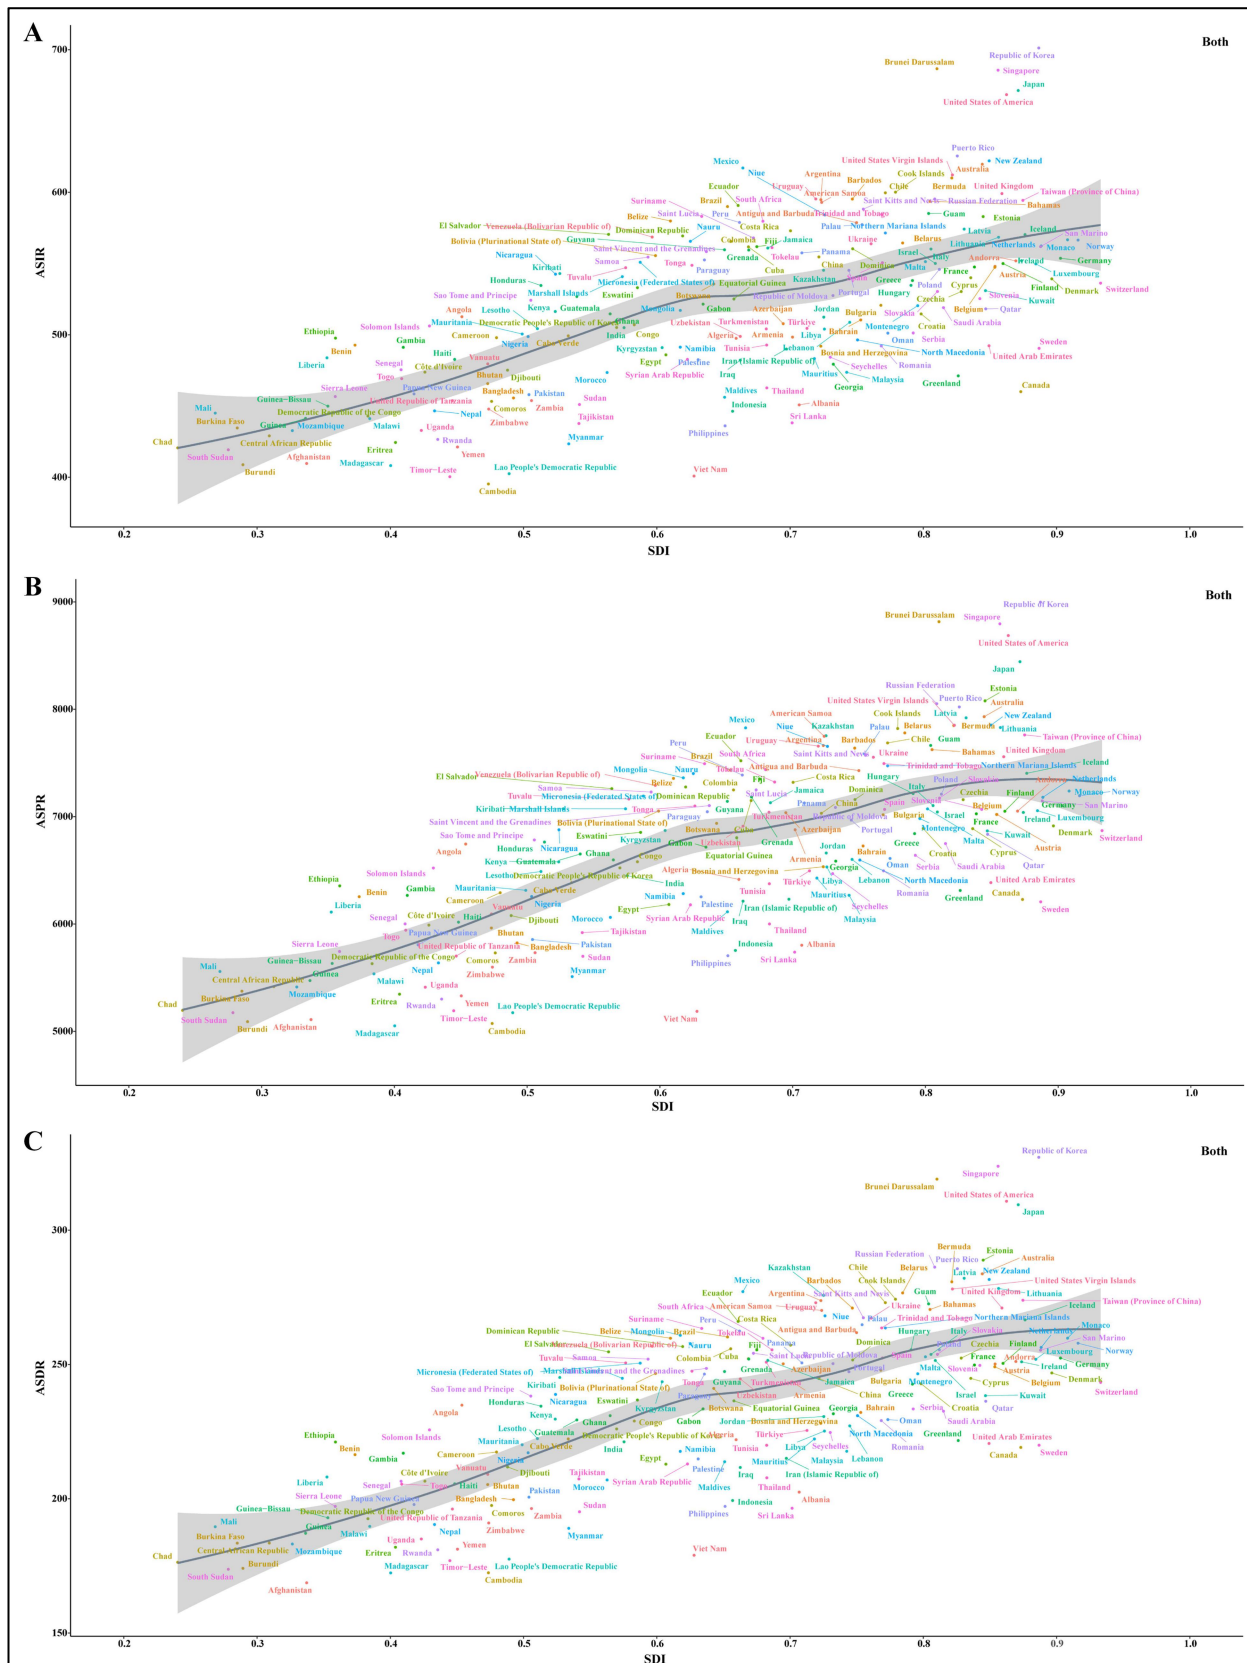

**Figure S11.** Correlation between SDI and ASRs of OA among both sexes at the national level in 2021. **(A)** ASIR,  $r=0.6396$ ,  $P<0.001$ . **(B)** ASPR,  $r=0.6687$ ,  $P<0.001$ . **(C)** ASDR,  $r=0.7029$ ,  $P<0.001$ . Each colored dot above represents a country, and the line represents the average expected value based on the SDI and ASRs in 204 countries and territories. SDI, socio-demographic index; ASRs, age-standardized rates; OA: osteoarthritis; ASIR, age-standardized incidence rate; ASPR, age-standardized prevalence rate; ASDR, age-standardized disability-adjusted life years rate.

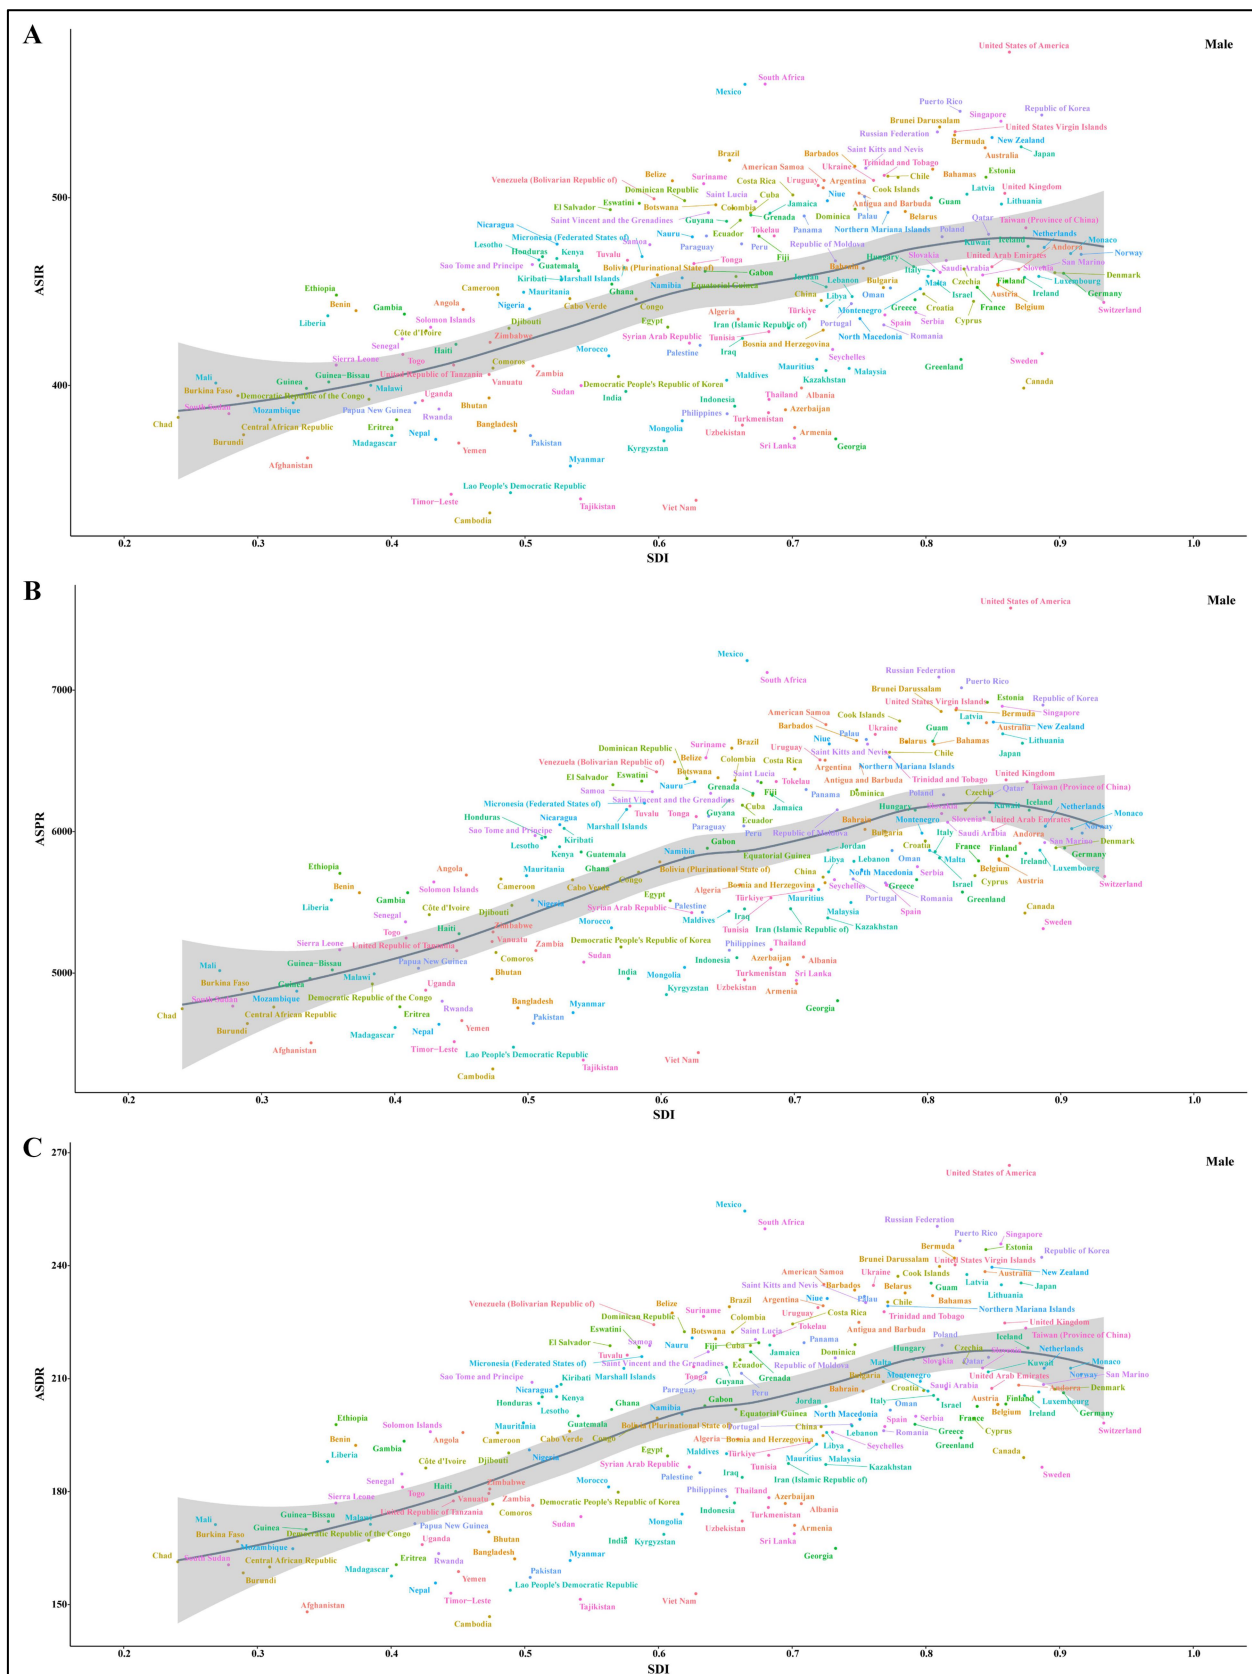

**Figure S12.** Correlation between SDI and ASRs OA among males at the national level in 2021. **(A)** ASIR,  $r=0.5402$ ,  $P<0.001$ . **(B)** ASPR,  $r=0.5905$ ,  $P<0.001$ . **(C)** ASDR,  $r=0.6171$ ,  $P<0.001$ . Each colored dot above represents a country, and the line represents the average expected value based on the SDI and ASRs in 204 countries and territories. SDI, socio-demographic index; ASRs, age-standardized rates; OA: osteoarthritis; ASIR, age-standardized incidence rate; ASPR, age-standardized prevalence rate; ASDR, age-standardized disability-adjusted life years rate.

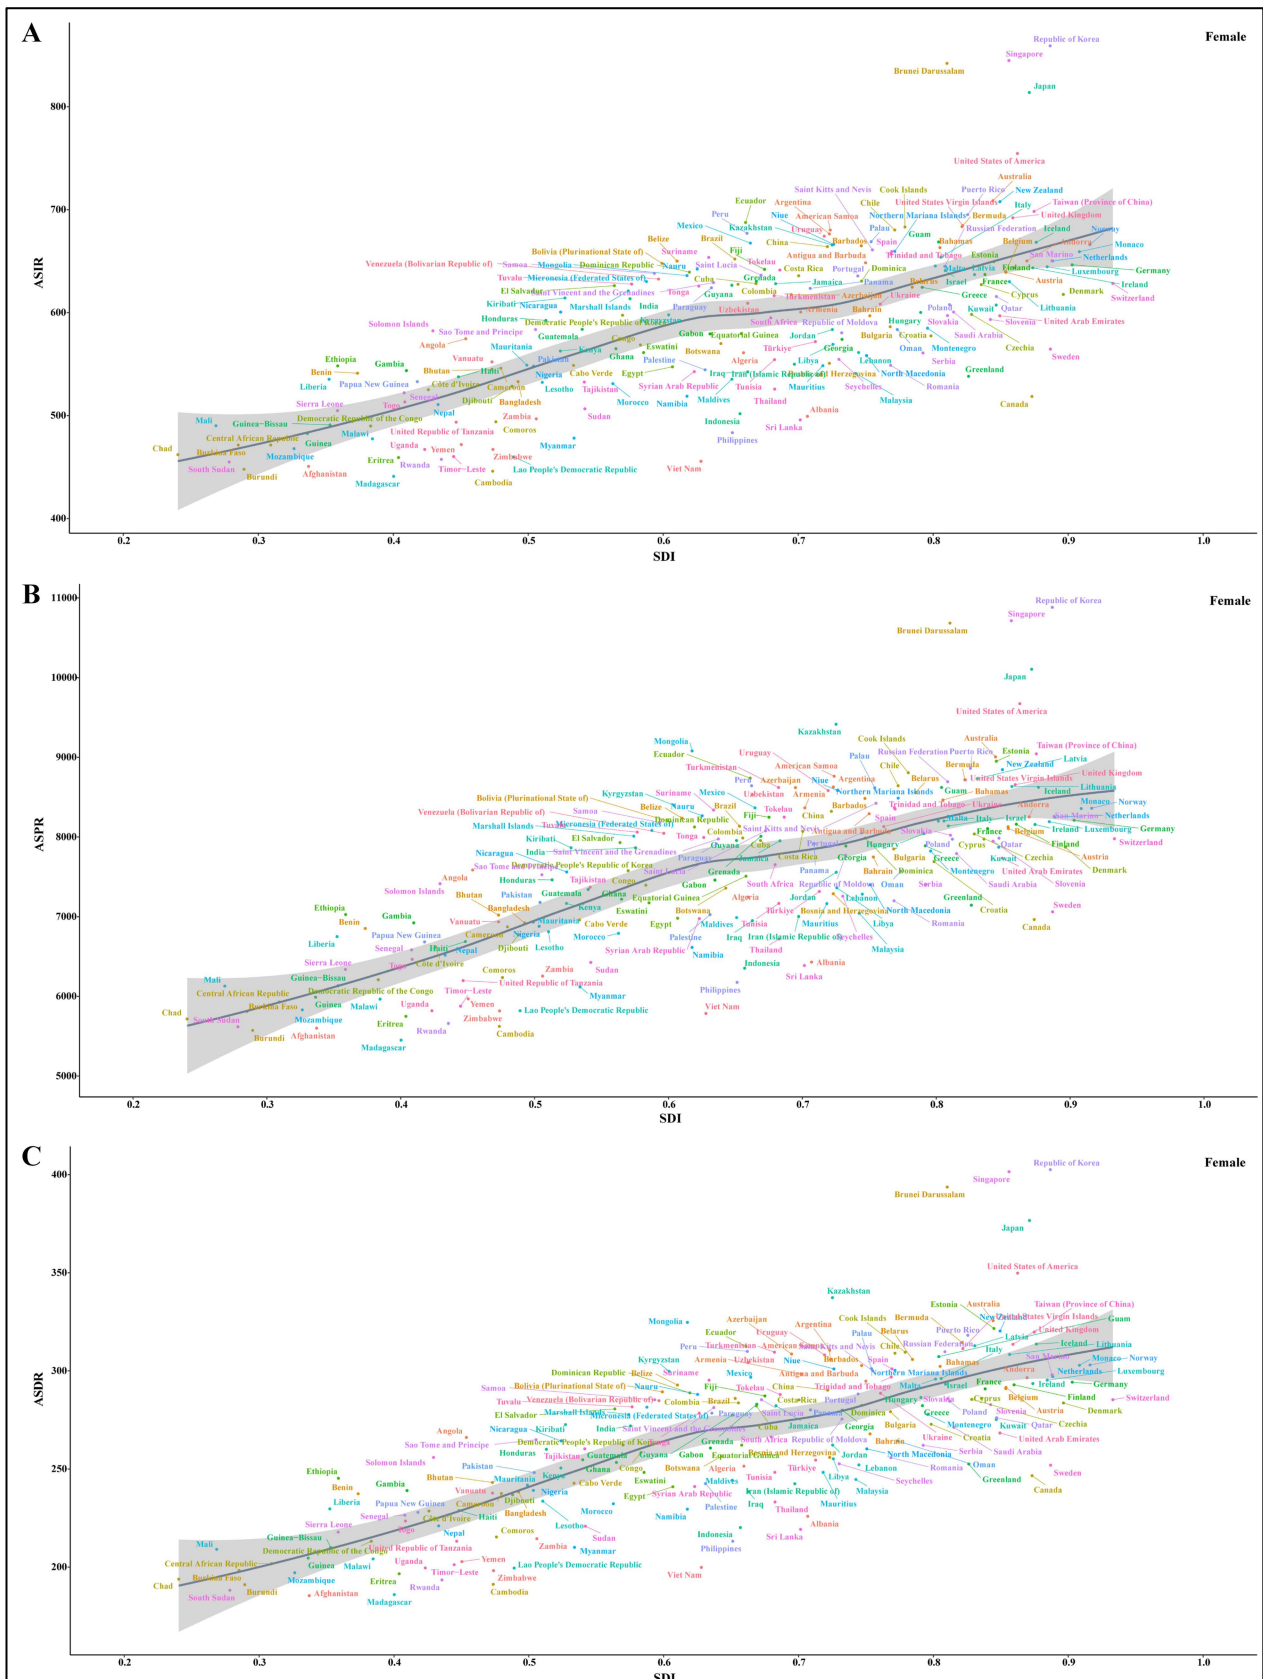

**Figure S13.** Correlation between SDI and ASRs of OA among females at the national level in 2021. **(A)** ASIR,  $r=0.7014$ ,  $P<0.001$ . **(B)** ASPR,  $r=0.7127$ ,  $P<0.001$ . **(C)** ASDR,  $r=0.7450$ ,  $P<0.001$ . Each colored dot above represents a country, and the line represents the average expected value based on the SDI and ASRs in 204 countries and territories. SDI, socio-demographic index; ASRs, age-standardized rates; OA: osteoarthritis; ASIR, age-standardized incidence rate; ASPR, age-standardized prevalence rate; ASDR, age-standardized

disability-adjusted life years rate.

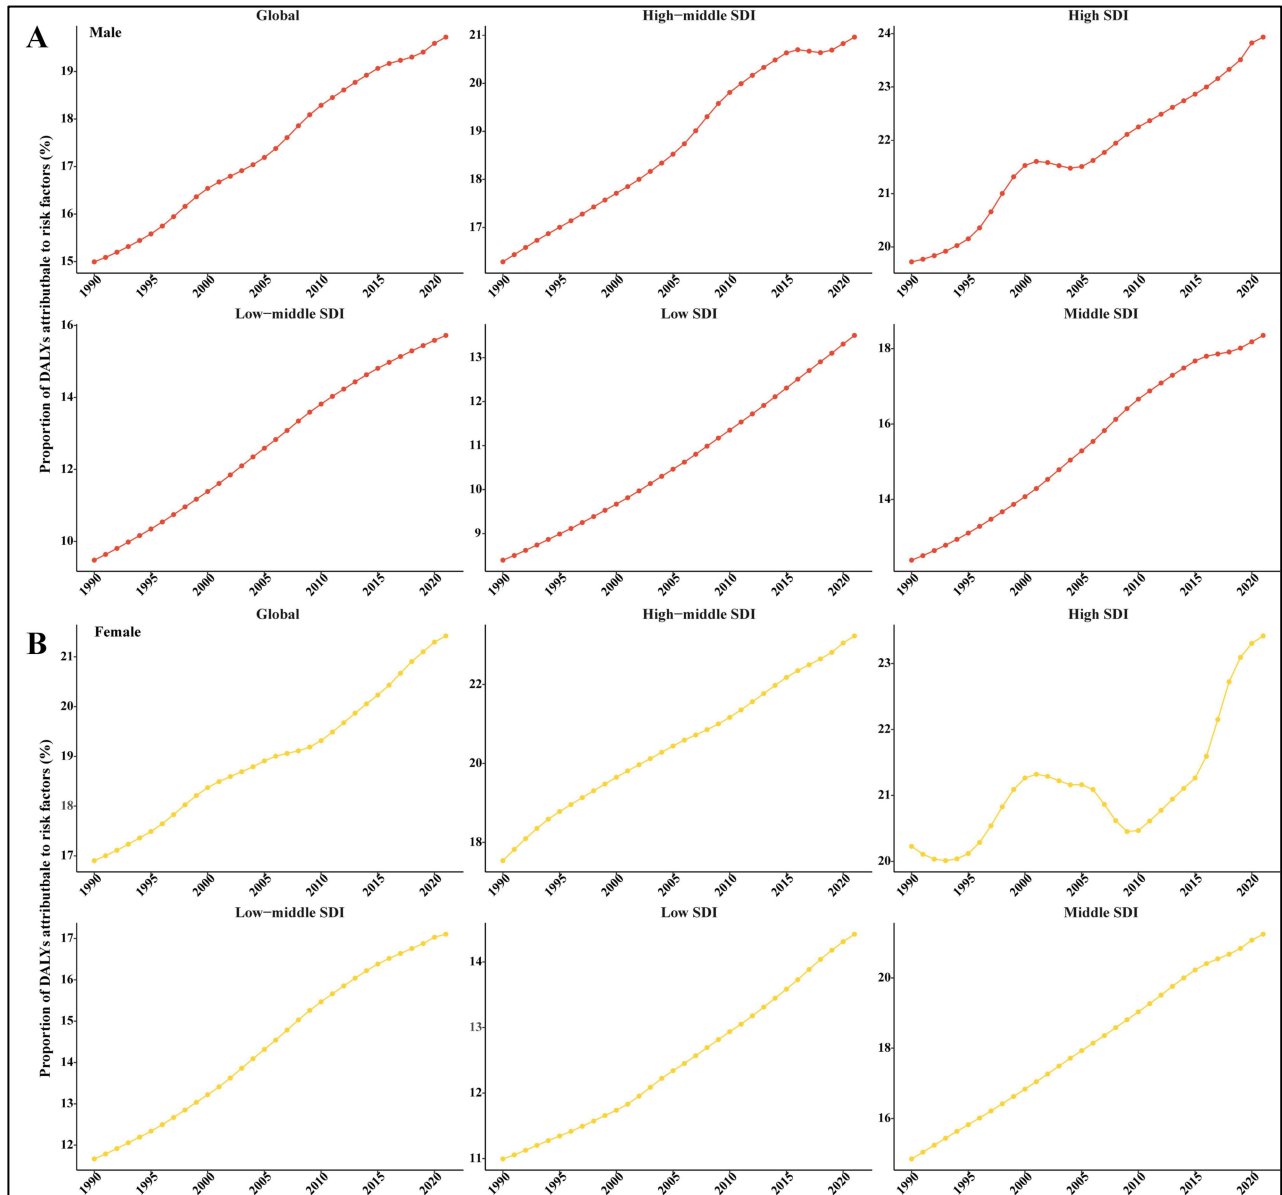

**Figure S14.** The proportion of DALYs of OA attributable to high BMI among males and females at the global and SDI quintile levels from 1990 to 2021. **(A)** Males. **(B)** Females. DALYs: disability-adjusted life years; OA: osteoarthritis; BMI: body-mass index; SDI: socio-demographic index.

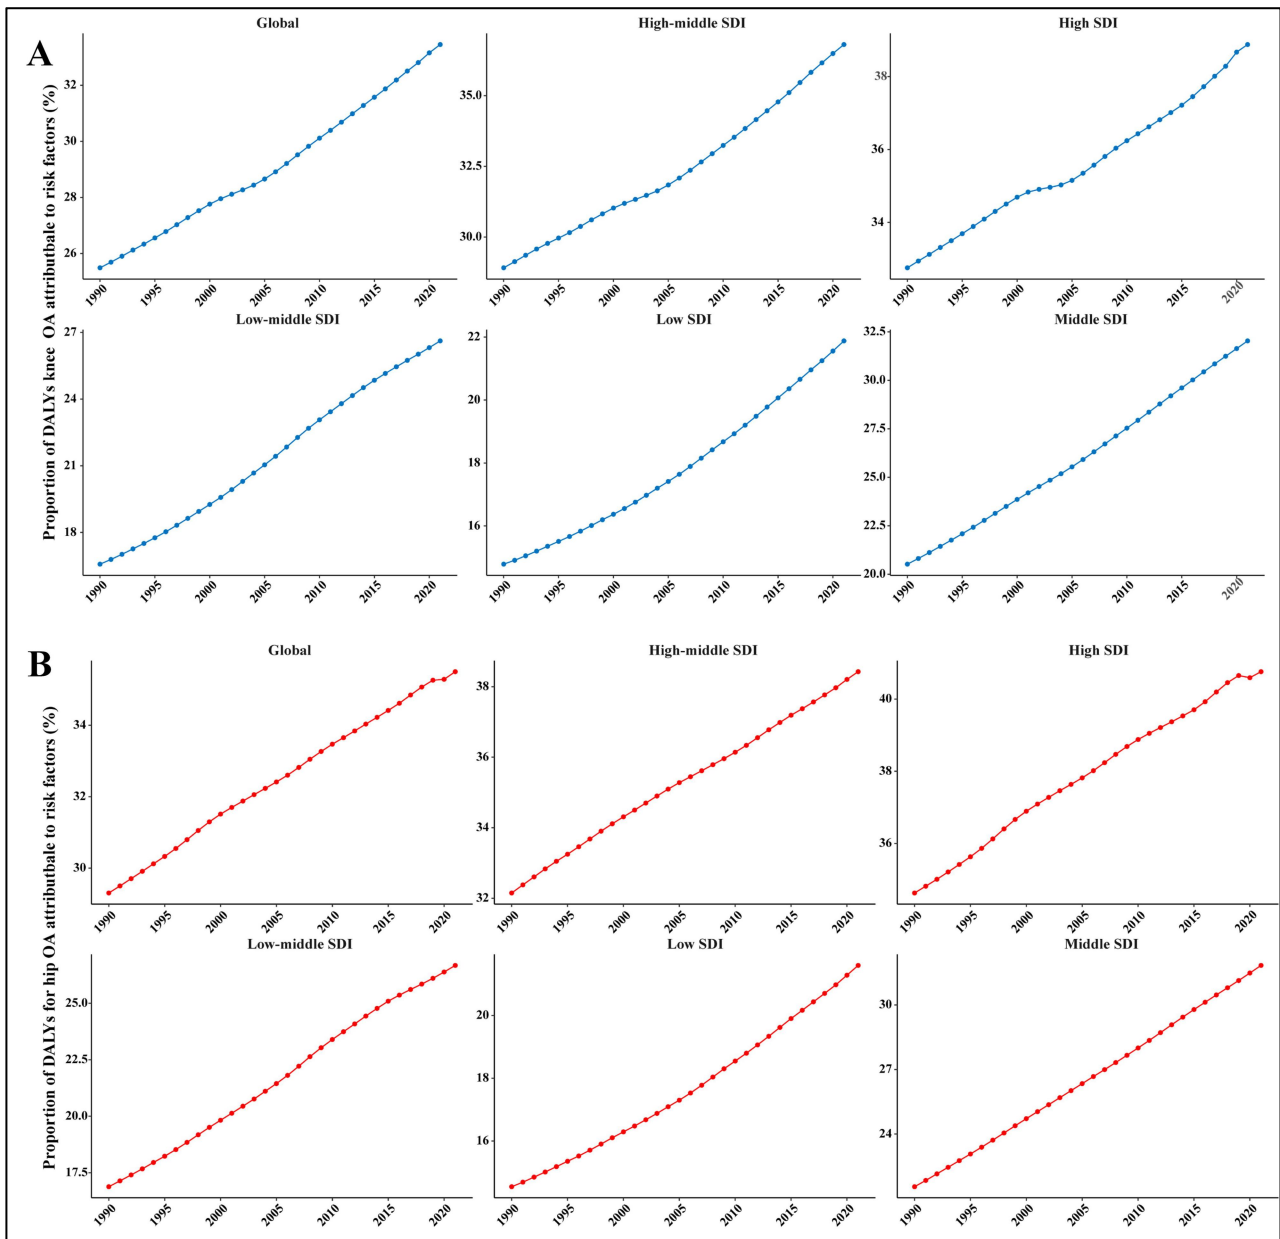

**Figure S15.** The proportion of DALYs of knee and hip OA attributable to high BMI among both sexes at the global and SDI quintile levels from 1990 to 2021. **(A)** Knee OA. **(B)** Hip OA. DALYs: disability-adjusted life years; OA: osteoarthritis; BMI: body-mass index; SDI: socio-demographic index.



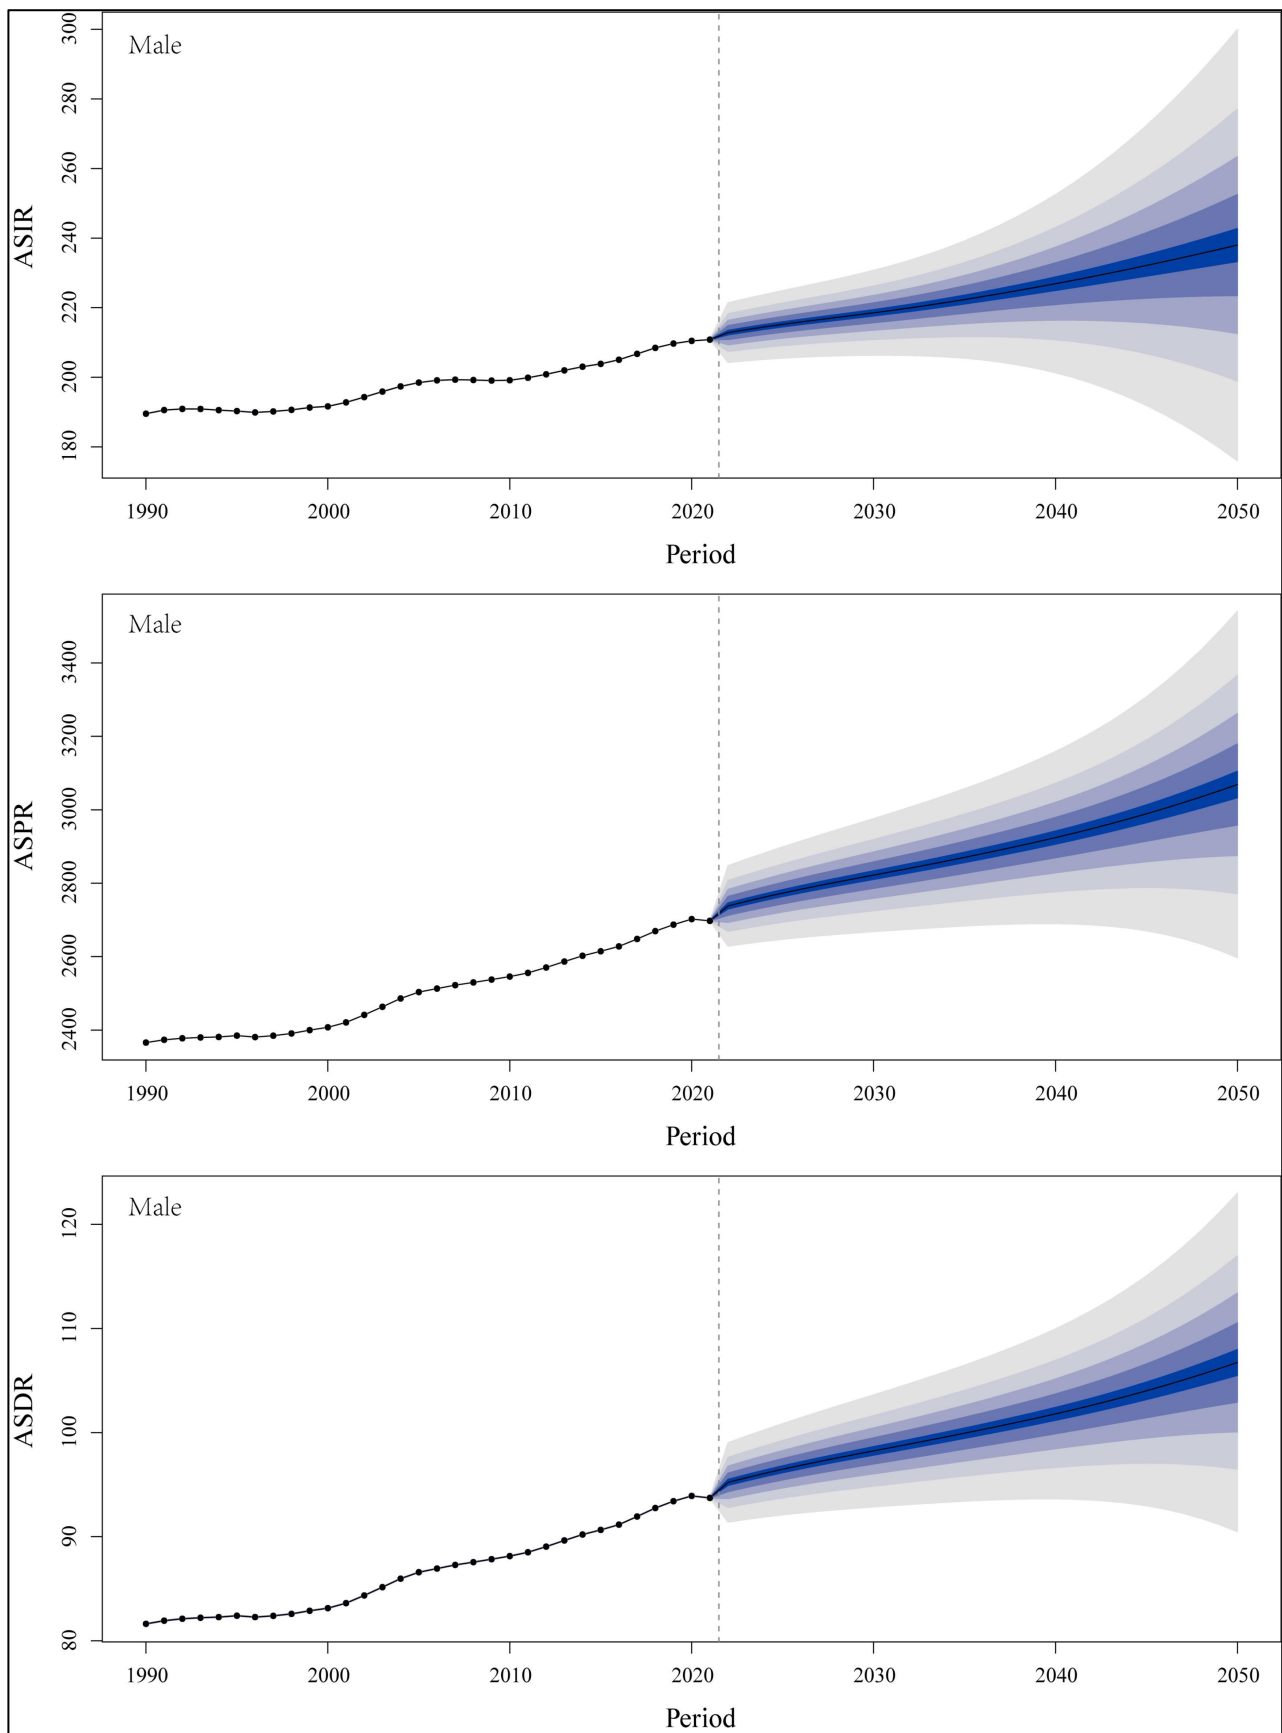

**Figure S16.** The projection of ASRs (per 100,000 population) of OA among males globally from 2021 to 2050. OA: osteoarthritis; DALYs: disability-adjusted life years rate; ASRs: age-standardized rates; ASIR: age-standardized incidence rate; ASPR: age-standardized prevalence rate; ASDR: age-standardized disability-adjusted life years rate.

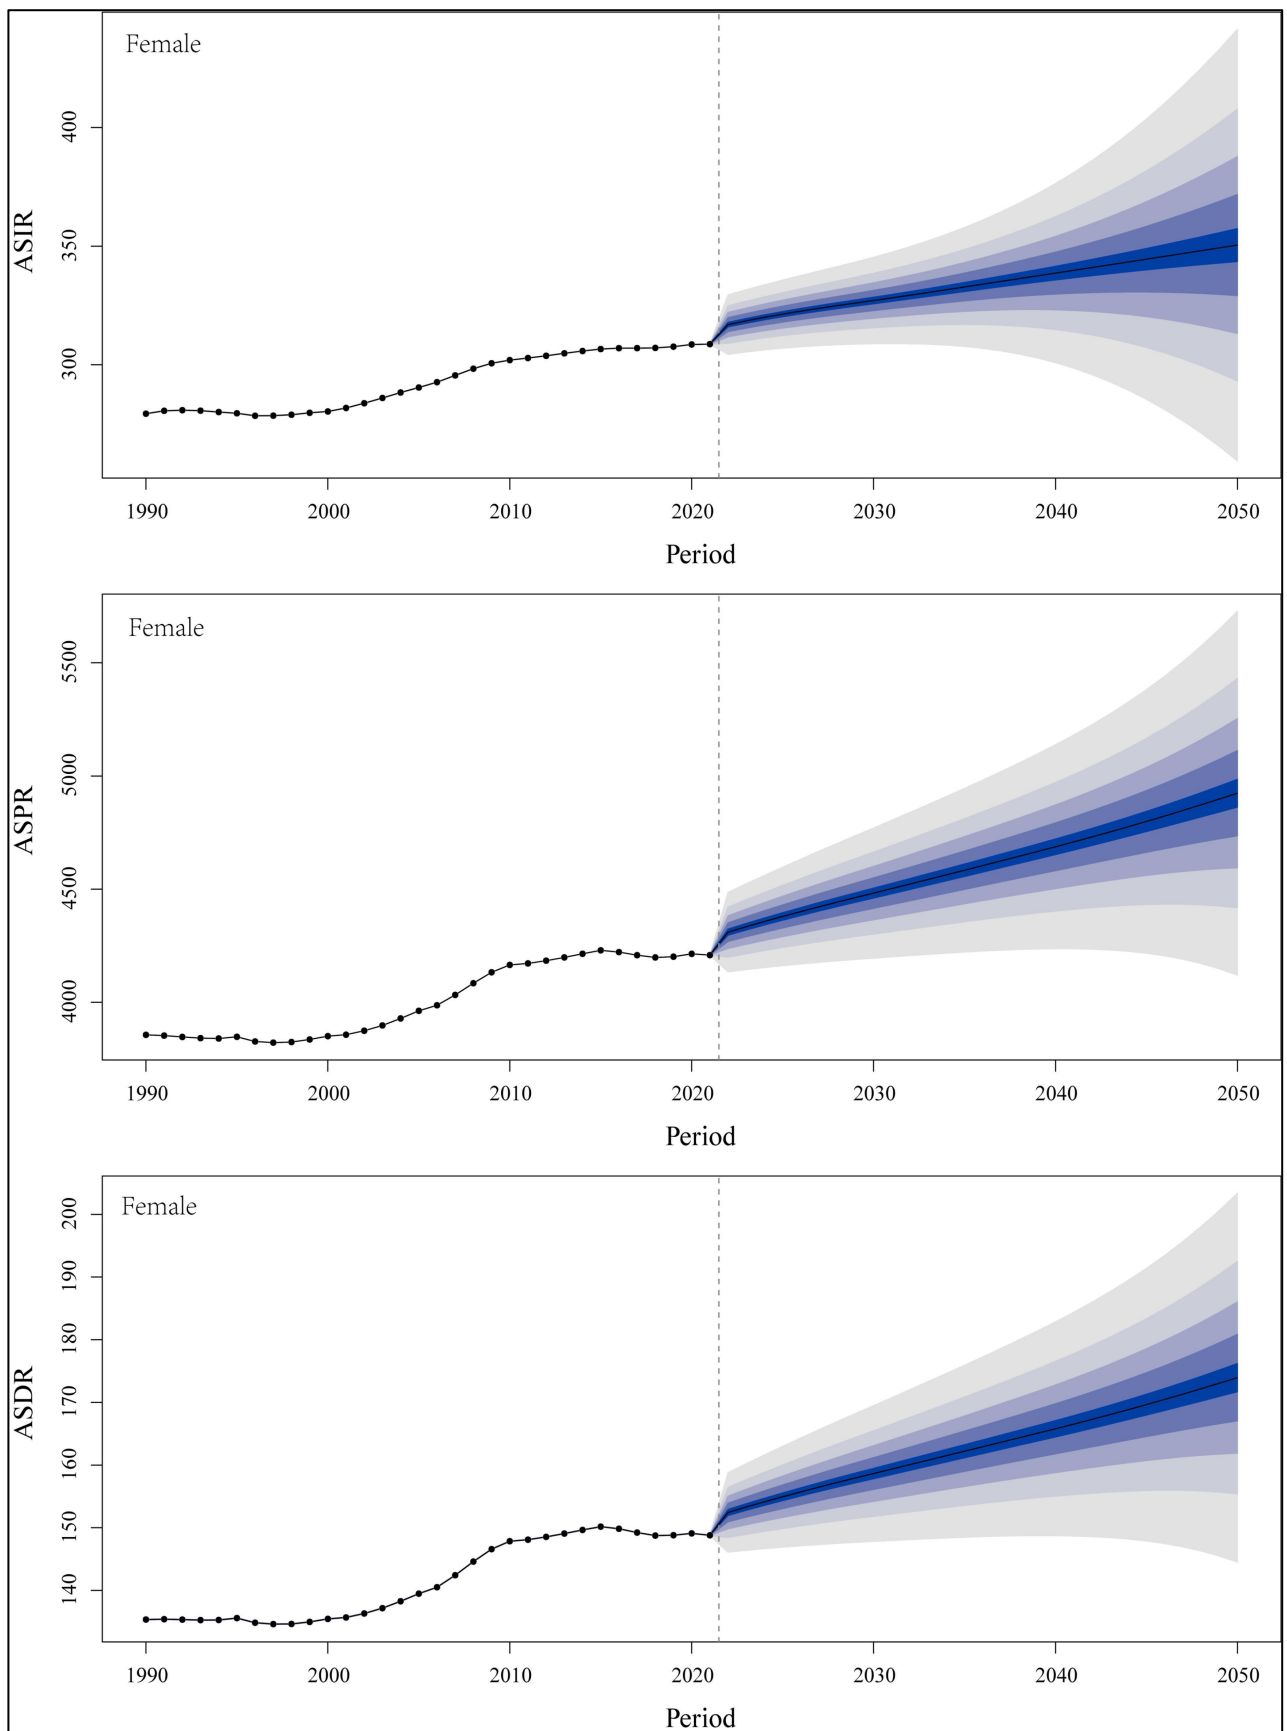

**Figure S17.** The projection of ASRs (per 100,000 population) of OA among females globally from 2021 to 2050. OA: osteoarthritis; DALYs: disability-adjusted life years rate; ASRs: age-standardized rates; ASIR: age-standardized incidence rate; ASPR: age-standardized prevalence rate; ASDR: age-standardized disability-adjusted life years rate.



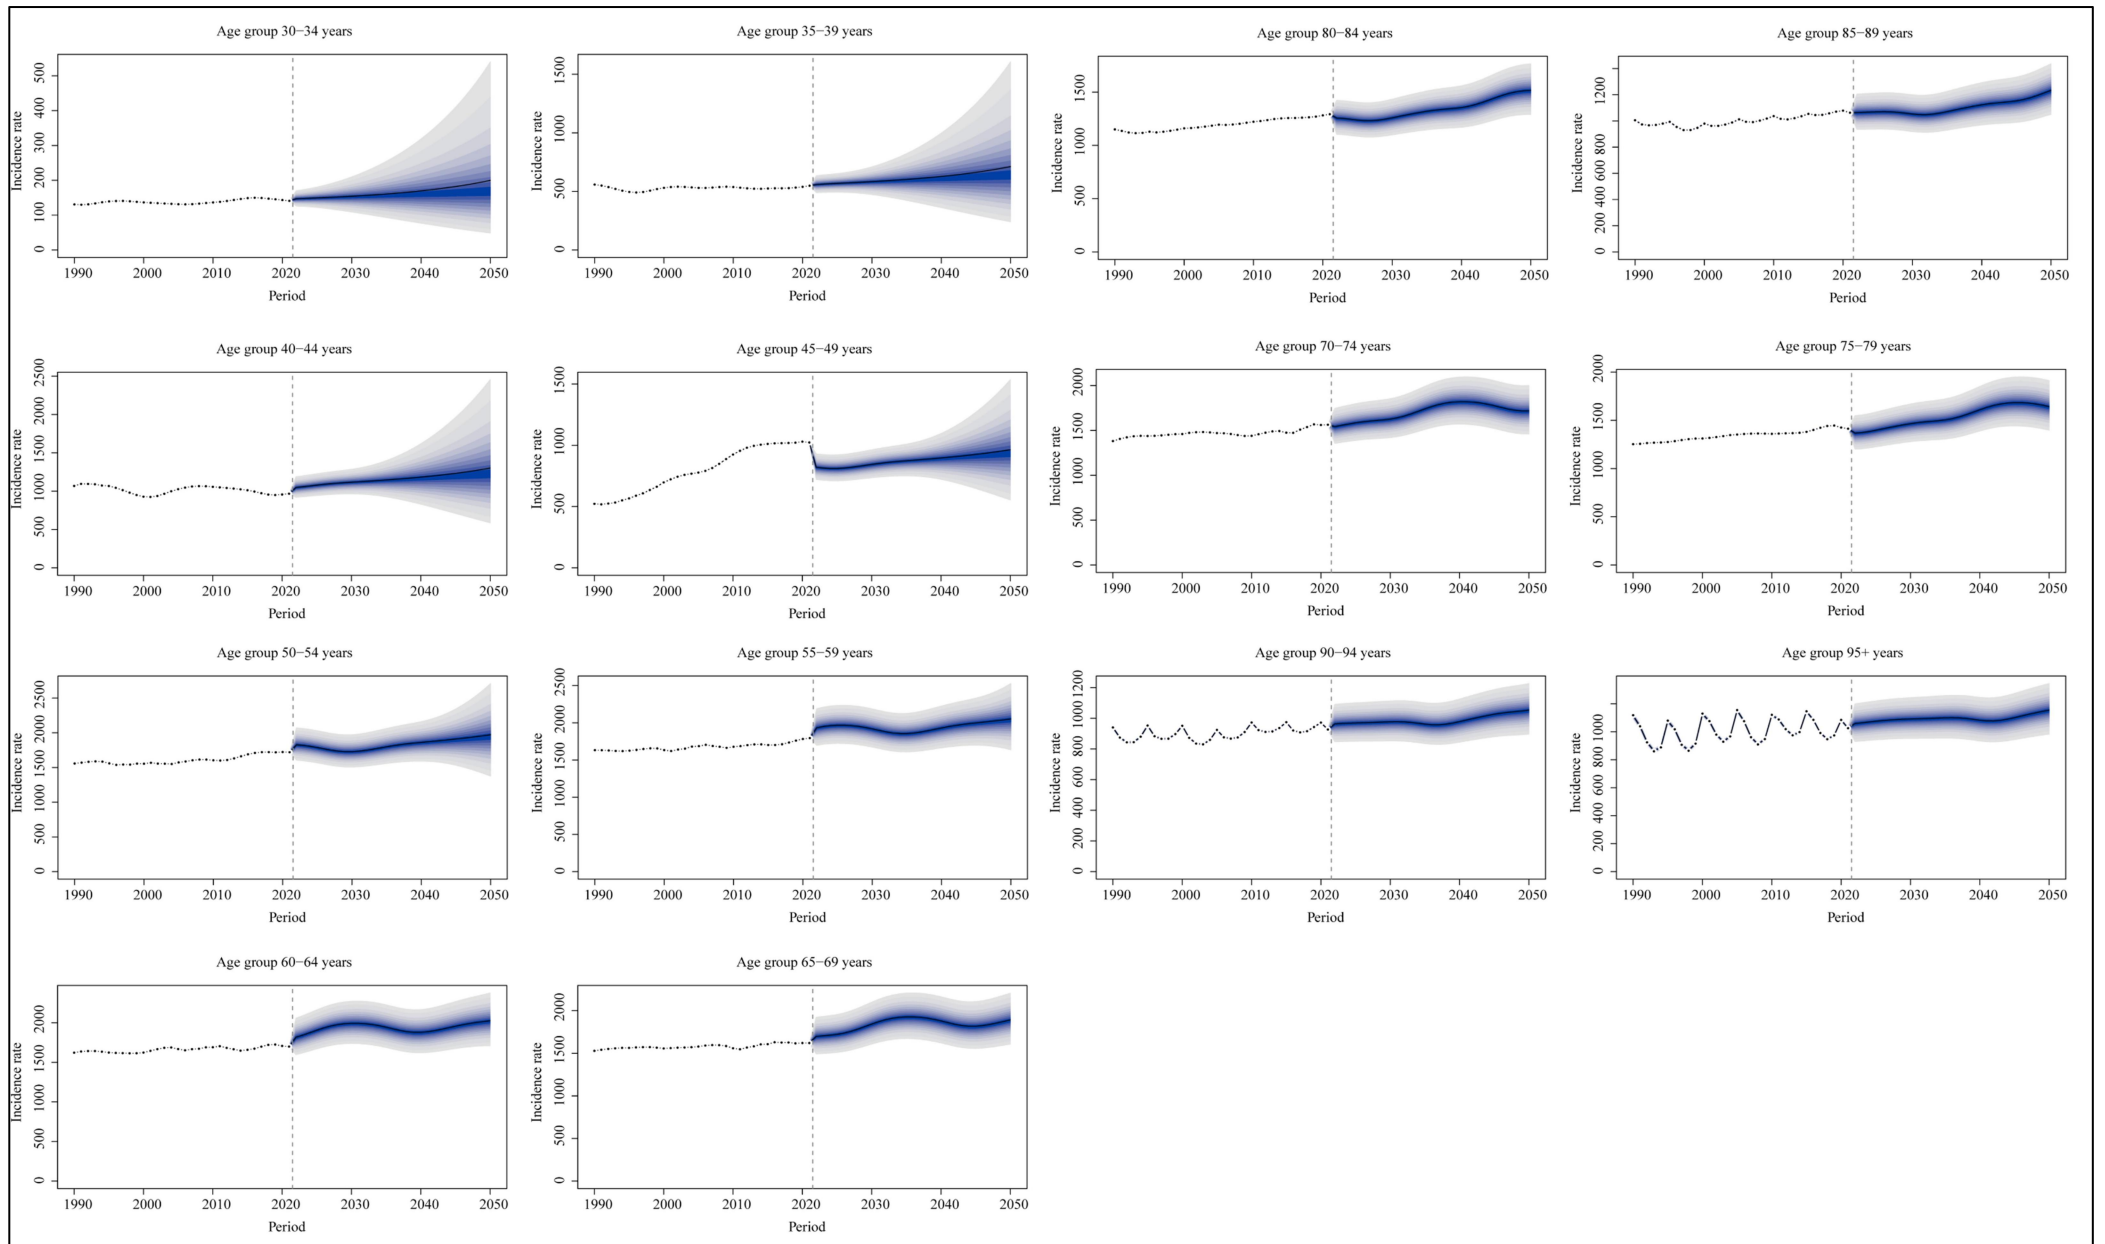

**Figure S18.** The projection of incidence rate (per 100,000 population) of OA across different age groups globally from 2021 to 2050. OA: osteoarthritis.

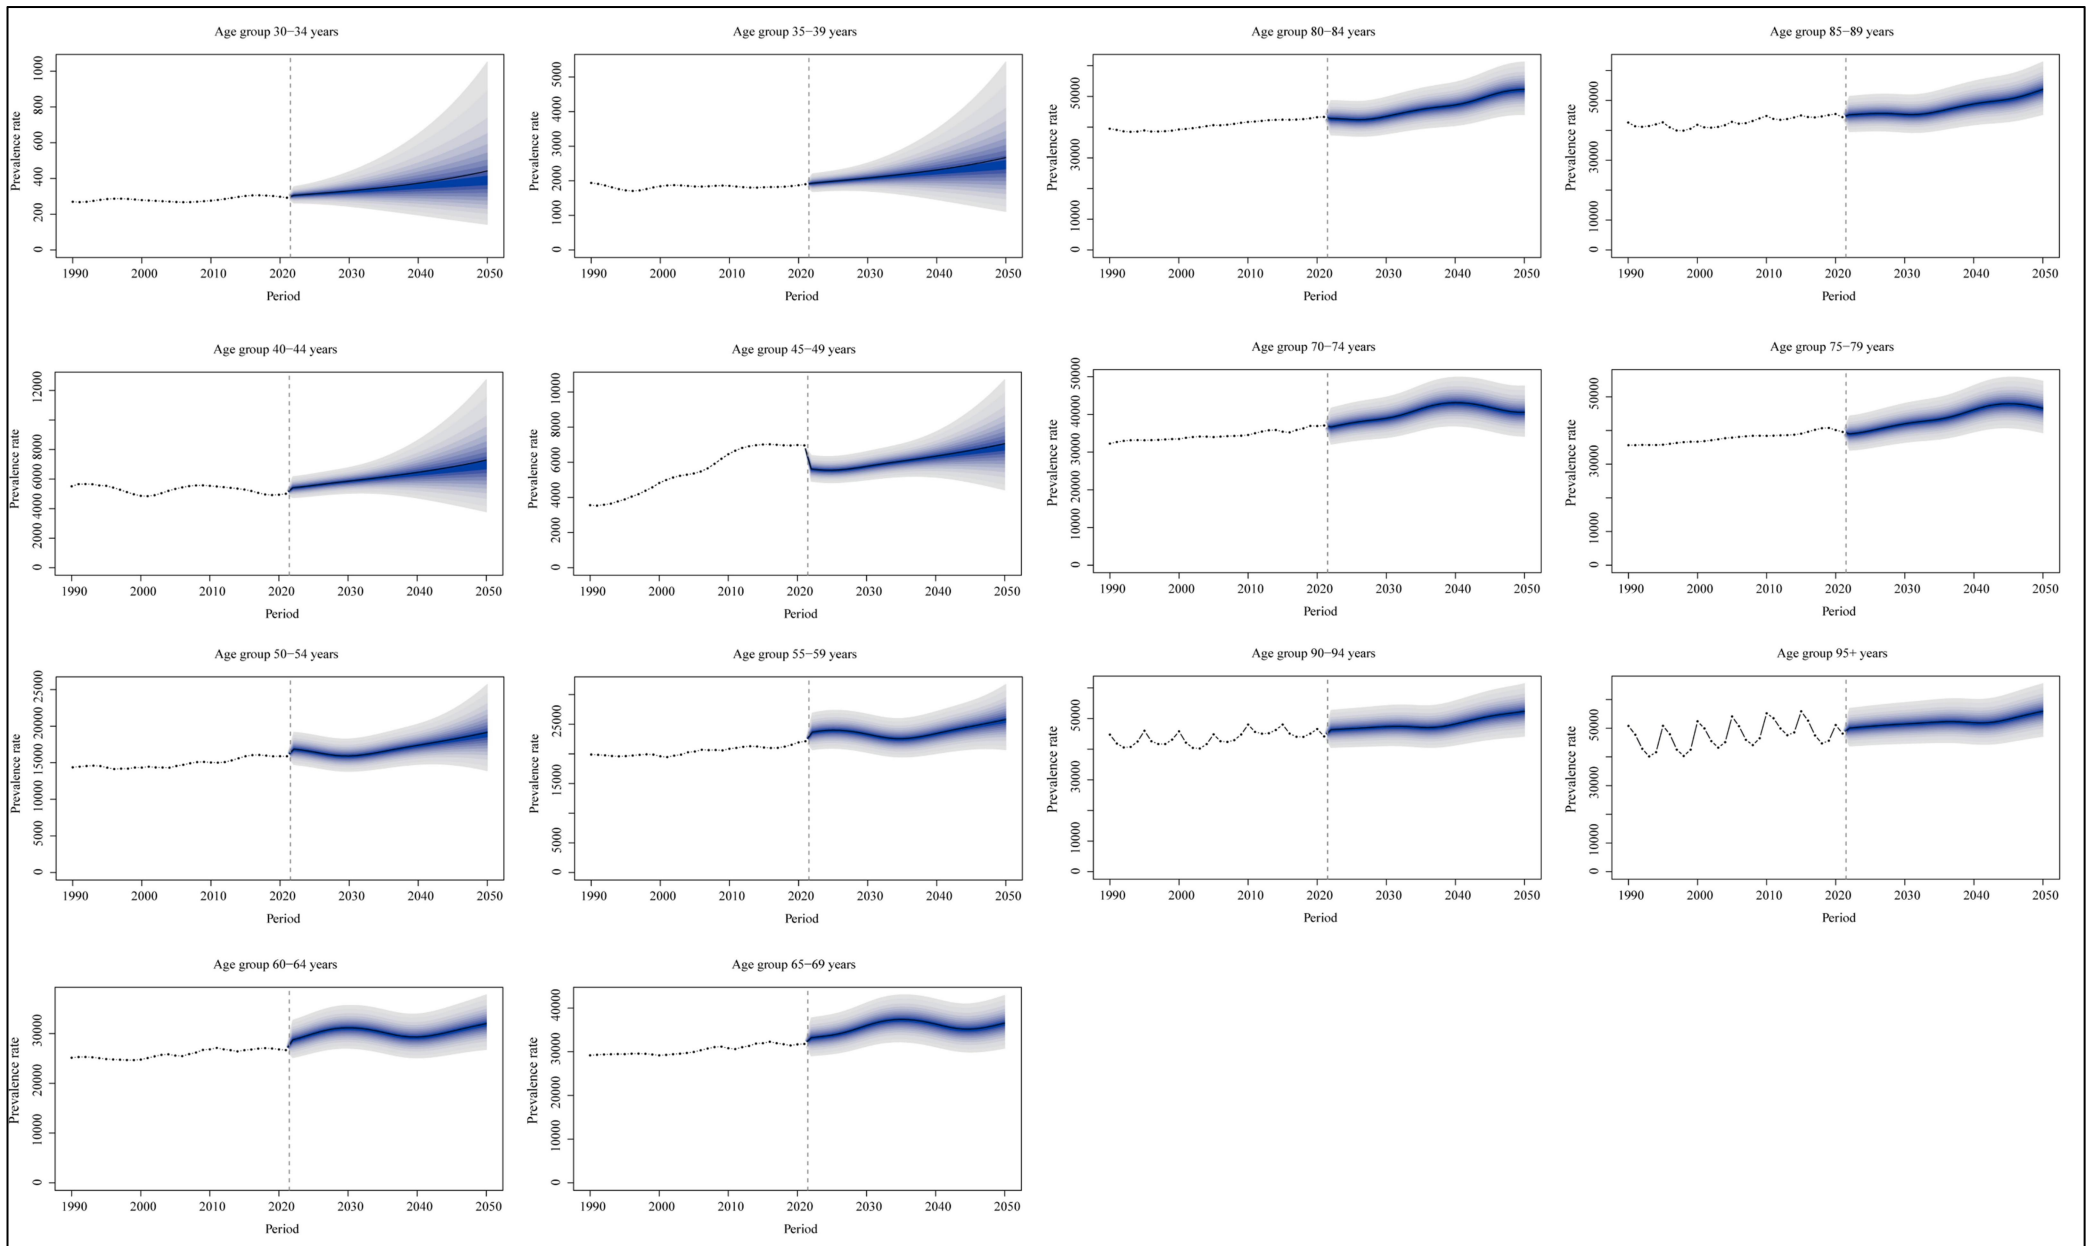

**Figure S19.** The projection of prevalence rate (per 100,000 population) of OA across different age groups globally from 2021 to 2050. OA: osteoarthritis.

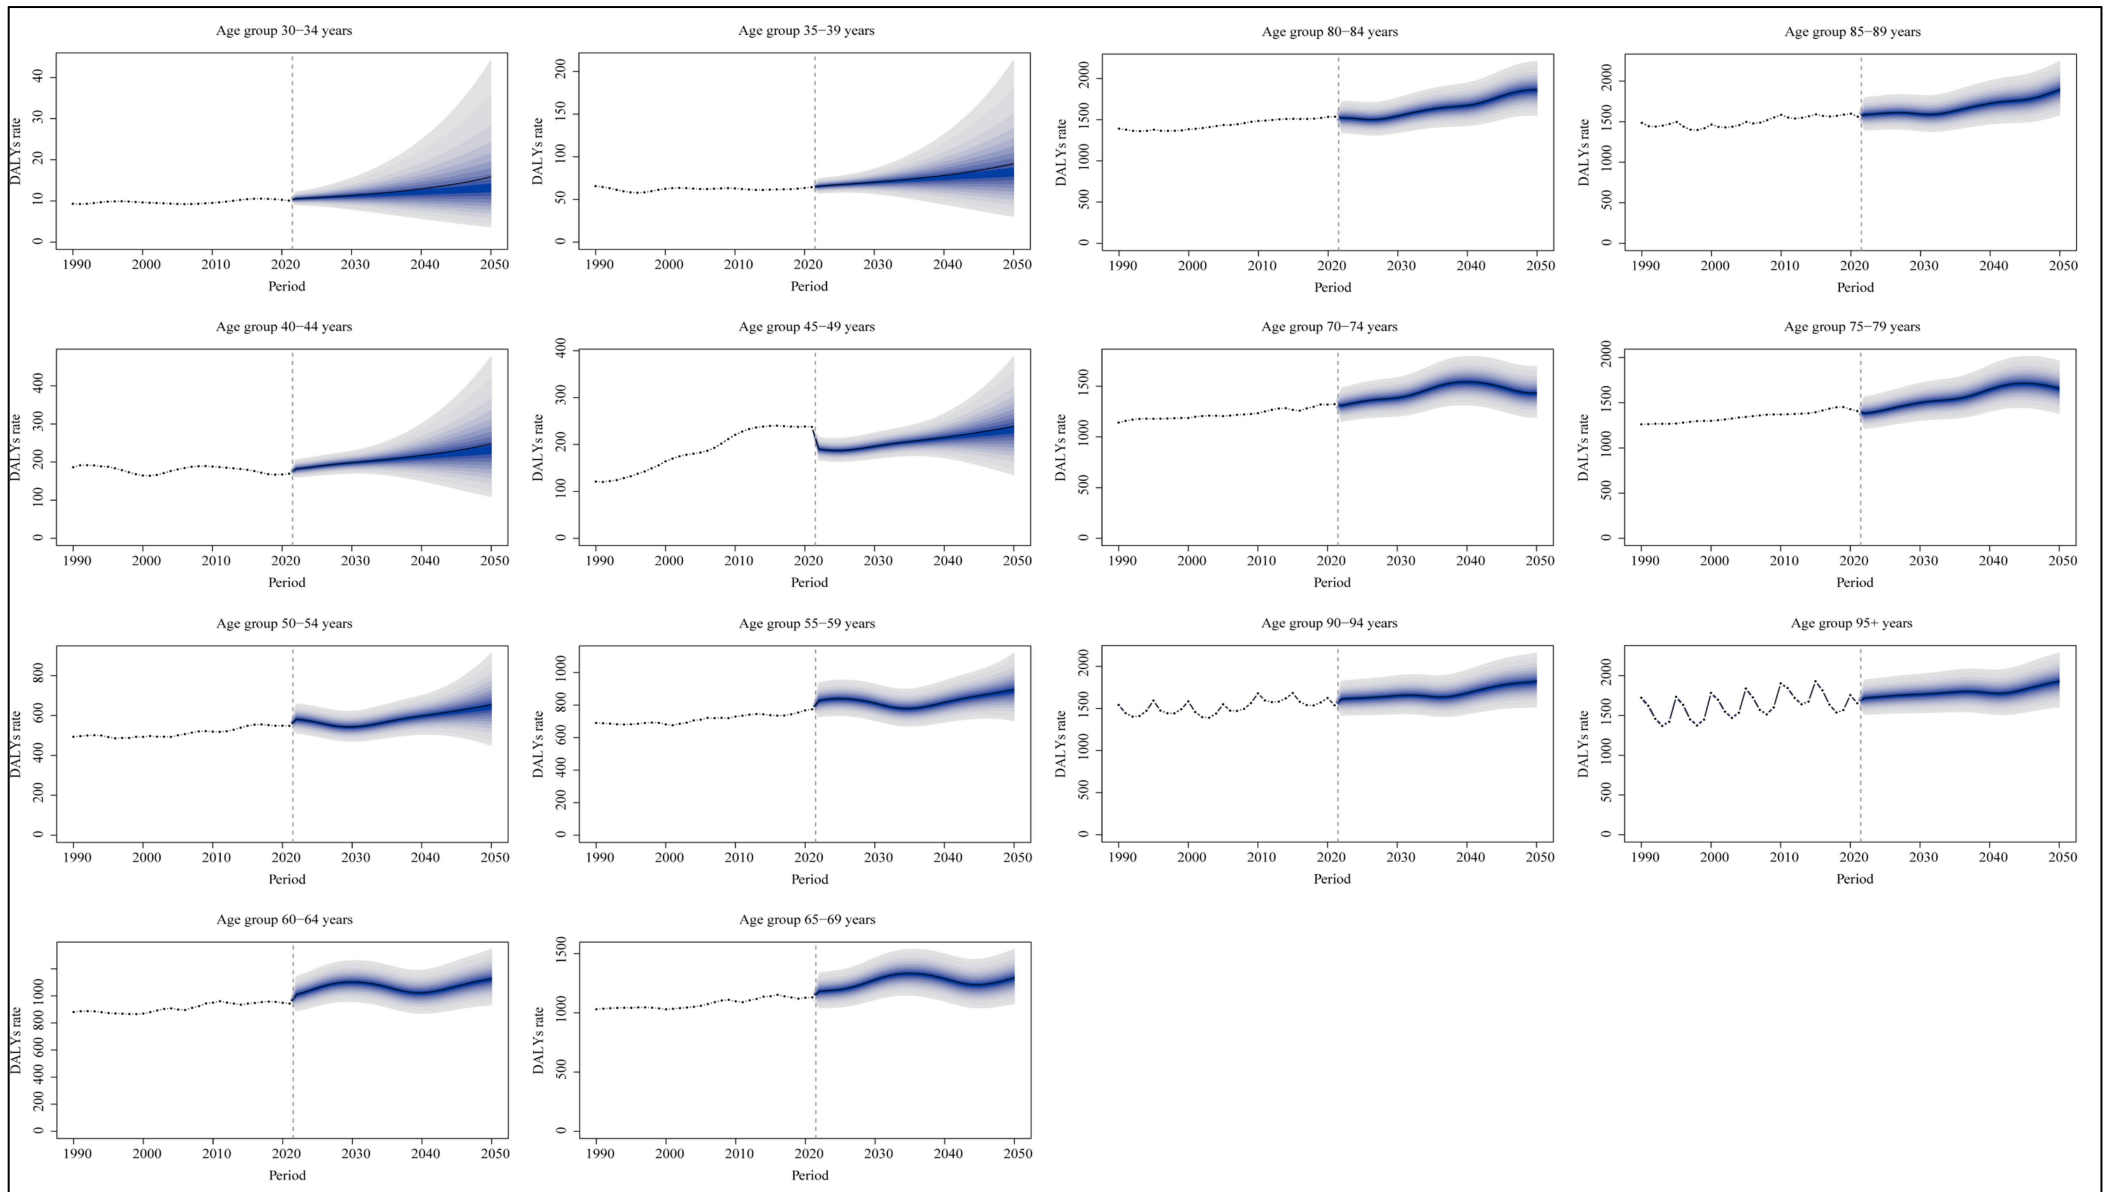

**Figure S20.** The projection of DALYs rate (per 100,000 population) of OA across different age groups globally from 2021 to 2050. DALYs: disability-adjusted life years; OA: osteoarthritis.

**Table S1.** The ASIR, ASPR, ASDR, and EAPCs of osteoarthritis from 1990 to 2021

| Characteristics      | ASIR (per 100,000 population) |                           |                     | ASPR (per 100,000 population) |                              |                     | ASDR (per 100,000 population) |                           |                     |
|----------------------|-------------------------------|---------------------------|---------------------|-------------------------------|------------------------------|---------------------|-------------------------------|---------------------------|---------------------|
|                      | 1990                          | 2021                      | EAPC<br>(95%CI)     | 1990                          | 2021                         | EAPC (95%CI)        | 1990                          | 2021                      | EAPC<br>(95%CI)     |
|                      | Both (95%UI)                  | Both (95%UI)              |                     | Both (95%UI)                  | Both (95%UI)                 |                     | Both (95%UI)                  | Both (95%UI)              |                     |
| <b>Global</b>        | 489.78<br>(433.10-541.51)     | 535.00<br>(472.38-591.97) | 0.33<br>(0.31-0.35) | 6393.12<br>(5683.20-7059.53)  | 6967.29<br>(6180.70-7686.06) | 0.34<br>(0.31-0.37) | 222.80<br>(106.65-450.29)     | 244.50<br>(117.06-493.11) | 0.37<br>(0.33-0.40) |
| <b>Sex</b>           |                               |                           |                     |                               |                              |                     |                               |                           |                     |
| Male                 | 408.56<br>(361.23-452.94)     | 445.74<br>(393.68-493.98) | 0.28<br>(0.25-0.30) | 5290.02<br>(4712.01-5894.75)  | 5773.36<br>(5125.94-6420.96) | 0.29<br>(0.27-0.32) | 182.42<br>(87.58-369.04)      | 200.52<br>(95.88-404.87)  | 0.31<br>(0.29-0.34) |
| Female               | 568.60<br>(502.58-627.86)     | 621.32<br>(548.49-686.94) | 0.36<br>(0.32-0.39) | 7354.53<br>(6532.33-8109.16)  | 8049.41<br>(7137.25-8892.72) | 0.38<br>(0.34-0.43) | 257.65<br>(123.39-520.40)     | 284.14<br>(136.29-573.11) | 0.42<br>(0.37-0.47) |
| <b>Types</b>         |                               |                           |                     |                               |                              |                     |                               |                           |                     |
| Osteoarthritis knee  | 330.26<br>(284.34-375.75)     | 353.67<br>(304.56-402.50) | 0.28<br>(0.26-0.30) | 3964.75<br>(3411.86-4536.40)  | 4294.27<br>(3695.04-4910.76) | 0.33<br>(0.30-0.35) | 127.14<br>(62.17-246.99)      | 137.59<br>(67.08-266.87)  | 0.33<br>(0.30-0.36) |
| Osteoarthritis hand  | 100.57<br>(74.51-128.13)      | 119.09<br>(88.73-151.13)  | 0.55<br>(0.48-0.61) | 1944.84<br>(1476.85-2478.43)  | 2237.78<br>(1693.67-2851.21) | 0.52<br>(0.44-0.60) | 61.67<br>(27.93-127.04)       | 70.94<br>(32.23-146.27)   | 0.52<br>(0.45-0.60) |
| Osteoarthritis hip   | 19.27<br>(14.72-24.41)        | 20.67<br>(15.76-26.19)    | 0.28<br>(0.26-0.30) | 391.66<br>(303.26-496.51)     | 416.01(321.23-529.74)        | 0.26<br>(0.23-0.28) | 12.43<br>(5.86-25.21)         | 13.19<br>(6.20-26.65)     | 0.26<br>(0.24-0.29) |
| Osteoarthritis other | 39.68<br>(32.01-50.71)        | 41.57<br>(33.45-53.36)    | 0.15<br>(0.15-0.16) | 678.37<br>(532.31-876.68)     | 716.69<br>(560.15-930.47)    | 0.18<br>(0.18-0.18) | 21.56<br>(10.01-45.31)        | 22.78<br>(10.54-47.81)    | 0.18<br>(0.18-0.18) |
| <b>SDI</b>           |                               |                           |                     |                               |                              |                     |                               |                           |                     |
| High                 | 568.82<br>(505.90-627.74)     | 611.30<br>(542.71-675.91) | 0.21<br>(0.17-0.25) | 7371.33<br>(6609.68-8130.17)  | 7897.27<br>(7067.13-8689.88) | 0.24<br>(0.19-0.29) | 262.74<br>(126.00-529.15)     | 283.13<br>(136.04-570.53) | 0.27<br>(0.21-0.33) |
| High-middle          | 498.45<br>(441.11-549.27)     | 548.07<br>(481.66-608.49) | 0.38<br>(0.35-0.42) | 6557.50<br>(5802.43-7265.76)  | 7120.38<br>(6297.95-7879.76) | 0.37<br>(0.33-0.41) | 228.99<br>(109.20-462.13)     | 250.58<br>(119.78-503.69) | 0.40<br>(0.36-0.44) |
| Middle               | 475.42<br>(419.58-527.87)     | 536.49<br>(473.16-595.02) | 0.48<br>(0.44-0.52) | 6066.13<br>(5375.33-6744.29)  | 6903.80<br>(6123.00-7643.11) | 0.52<br>(0.48-0.56) | 208.27<br>(100.47-419.68)     | 240.41<br>(115.09-483.99) | 0.57<br>(0.53-0.61) |
| Low-middle           | 423.51<br>(374.68-469.50)     | 480.13<br>(424.96-533.01) | 0.42<br>(0.40-0.44) | 5326.73<br>(4722.18-5924.73)  | 6106.25<br>(5419.32-6763.20) | 0.45<br>(0.43-0.48) | 180.18<br>(86.93-364.19)      | 209.35<br>(100.40-422.62) | 0.50<br>(0.48-0.53) |
| Low                  | 408.88<br>(362.19-452.55)     | 447.12<br>(395.36-493.37) | 0.29<br>(0.28-0.31) | 5080.55<br>(4507.60-5674.54)  | 5605.58<br>(4967.54-6230.60) | 0.32<br>(0.31-0.34) | 170.90<br>(82.56-345.11)      | 190.93<br>(91.63-384.26)  | 0.37<br>(0.35-0.39) |
| <b>Regions</b>       |                               |                           |                     |                               |                              |                     |                               |                           |                     |
| Andean Latin America | 519.51<br>(461.53-577.69)     | 578.18<br>(511.33-641.10) | 0.35<br>(0.34-0.37) | 6602.95<br>(5861.30-7291.11)  | 7370.44<br>(6552.10-8123.13) | 0.35<br>(0.34-0.37) | 231.91<br>(111.18-466.16)     | 260.94<br>(125.19-526.82) | 0.38<br>(0.36-0.40) |
| Australasia          | 555.78<br>(493.55-617.22)     | 620.09<br>(550.76-686.53) | 0.34<br>(0.31-0.36) | 7195.28<br>(6466.74-7950.86)  | 7917.60<br>(7098.38-8735.71) | 0.31<br>(0.29-0.33) | 254.48<br>(123.19-513.81)     | 283.38<br>(139.24-577.97) | 0.34<br>(0.31-0.36) |

|                              |                           |                           |                      |                              |                              |                      |                           |                           |                      |
|------------------------------|---------------------------|---------------------------|----------------------|------------------------------|------------------------------|----------------------|---------------------------|---------------------------|----------------------|
| Caribbean                    | 513.03<br>(455.98-570.50) | 555.77<br>(493.24-617.51) | 0.29<br>(0.27-0.30)  | 6514.84<br>(5762.16-7198.00) | 7134.56<br>(6327.26-7876.59) | 0.32<br>(0.31-0.33)  | 228.48<br>(109.52-461.20) | 251.06<br>(120.09-508.25) | 0.34<br>(0.32-0.35)  |
| Central Asia                 | 444.99<br>(392.55-498.51) | 504.46<br>(442.21-565.75) | 0.43<br>(0.39-0.46)  | 6143.82<br>(5368.48-6965.53) | 7034.89<br>(6120.08-8010.15) | 0.47<br>(0.42-0.51)  | 215.80<br>(104.18-434.30) | 249.29<br>(119.63-500.56) | 0.50<br>(0.45-0.55)  |
| Central Europe               | 474.27<br>(419.37-525.88) | 522.05<br>(460.81-580.35) | 0.33<br>(0.32-0.35)  | 6276.97<br>(5554.86-7001.94) | 6948.51<br>(6129.15-7752.72) | 0.36<br>(0.34-0.37)  | 218.64<br>(104.72-441.82) | 245.41<br>(117.63-496.21) | 0.41<br>(0.39-0.43)  |
| Central Latin America        | 527.96<br>(468.13-587.05) | 589.49<br>(521.45-652.52) | 0.37<br>(0.36-0.37)  | 6661.13<br>(5900.48-7353.18) | 7499.49<br>(6635.38-8259.93) | 0.40<br>(0.39-0.41)  | 231.66<br>(110.81-468.03) | 264.58<br>(126.15-535.65) | 0.45<br>(0.44-0.46)  |
| Central Sub-Saharan Africa   | 441.86<br>(390.35-491.24) | 463.08<br>(409.68-515.24) | 0.12<br>(0.07-0.16)  | 5622.81<br>(4965.80-6260.93) | 5940.49<br>(5268.27-6589.54) | 0.13<br>(0.08-0.18)  | 191.36<br>(91.09-387.34)  | 204.30<br>(97.78-412.23)  | 0.17<br>(0.11-0.23)  |
| East Asia                    | 487.30<br>(428.32-544.04) | 554.47<br>(486.91-619.37) | 0.58<br>(0.50-0.65)  | 6157.54<br>(5425.37-6866.85) | 7036.10<br>(6216.29-7835.76) | 0.60<br>(0.52-0.69)  | 211.00<br>(102.08-424.58) | 245.04<br>(117.45-492.41) | 0.66<br>(0.58-0.75)  |
| Eastern Europe               | 550.43<br>(484.03-614.18) | 584.97<br>(515.25-651.42) | 0.29<br>(0.26-0.31)  | 7541.08<br>(6611.08-8496.07) | 7906.11<br>(6954.04-8880.09) | 0.28<br>(0.24-0.32)  | 265.83<br>(126.81-540.87) | 280.78<br>(134.37-567.03) | 0.32<br>(0.27-0.37)  |
| Eastern Sub-Saharan Africa   | 411.50<br>(363.20-457.47) | 461.02<br>(407.42-509.93) | 0.39<br>(0.37-0.40)  | 5113.71<br>(4544.28-5704.44) | 5829.96<br>(5160.63-6476.62) | 0.44<br>(0.43-0.46)  | 173.52<br>(83.30-351.43)  | 200.97<br>(96.11-405.27)  | 0.51<br>(0.49-0.52)  |
| High-income Asia Pacific     | 641.16<br>(568.18-707.78) | 682.07<br>(606.06-752.84) | 0.35<br>(0.22-0.49)  | 8071.98<br>(7169.35-8905.87) | 8608.63<br>(7674.07-9485.19) | 0.42<br>(0.24-0.59)  | 291.10<br>(139.90-587.96) | 314.98<br>(150.55-636.77) | 0.51<br>(0.29-0.73)  |
| High-income North America    | 605.72<br>(535.69-670.62) | 646.38<br>(572.29-715.37) | 0.07<br>(-0.07-0.21) | 7987.16<br>(7188.90-8824.97) | 8421.62<br>(7534.98-9282.03) | 0.09<br>(-0.04-0.23) | 286.25<br>(137.18-576.08) | 300.89<br>(144.87-606.97) | 0.07<br>(-0.08-0.22) |
| North Africa and Middle East | 424.31<br>(375.36-470.67) | 488.31<br>(433.70-542.33) | 0.44<br>(0.41-0.47)  | 5362.22<br>(4751.55-5979.22) | 6265.22<br>(5572.94-6946.23) | 0.49<br>(0.45-0.52)  | 183.41<br>(87.76-371.84)  | 215.92<br>(103.37-437.62) | 0.51<br>(0.47-0.55)  |
| Oceania                      | 441.66<br>(389.80-491.69) | 480.95<br>(423.12-536.36) | 0.25<br>(0.22-0.27)  | 5637.24<br>(5022.89-6261.36) | 6196.48<br>(5474.55-6895.02) | 0.28<br>(0.25-0.30)  | 192.33<br>(92.49-385.92)  | 212.87<br>(102.99-428.52) | 0.30<br>(0.28-0.33)  |
| South Asia                   | 430.77<br>(382.03-477.59) | 495.01<br>(436.64-548.03) | 0.47<br>(0.44-0.49)  | 5407.04<br>(4798.72-5985.59) | 6326.13<br>(5612.39-7009.64) | 0.53<br>(0.51-0.56)  | 181.92<br>(87.80-368.21)  | 216.90<br>(104.00-438.04) | 0.60<br>(0.58-0.63)  |
| Southeast Asia               | 376.04<br>(332.26-418.37) | 437.13<br>(386.13-485.01) | 0.51<br>(0.50-0.51)  | 4796.58<br>(4256.53-5377.23) | 5675.80<br>(5001.76-6320.89) | 0.56<br>(0.55-0.57)  | 163.30<br>(78.14-329.58)  | 196.18<br>(93.56-393.42)  | 0.61<br>(0.61-0.62)  |
| Southern Latin America       | 540.18<br>(478.83-600.89) | 596.27<br>(530.39-660.42) | 0.29<br>(0.26-0.32)  | 7001.84<br>(6250.94-7759.15) | 7669.24<br>(6896.46-8466.30) | 0.29<br>(0.26-0.31)  | 247.99<br>(118.32-499.99) | 273.53<br>(131.22-548.73) | 0.31<br>(0.28-0.34)  |
| Southern Sub-Saharan Africa  | 513.31<br>(454.83-568.81) | 557.24<br>(493.49-618.18) | 0.28<br>(0.27-0.29)  | 6559.80<br>(5794.82-7289.01) | 7161.23<br>(6333.34-7951.33) | 0.31<br>(0.30-0.32)  | 229.15<br>(110.10-460.99) | 249.45<br>(120.36-500.63) | 0.30<br>(0.29-0.32)  |
| Tropical Latin America       | 527.59<br>(467.44-585.25) | 589.12<br>(521.39-650.60) | 0.38<br>(0.37-0.39)  | 6604.05<br>(5863.57-7307.66) | 7424.65<br>(6582.79-8241.00) | 0.40<br>(0.39-0.41)  | 228.15<br>(109.07-460.14) | 259.93<br>(124.74-524.63) | 0.45<br>(0.43-0.46)  |
| Western Europe               | 521.51<br>(465.66-578.73) | 557.66<br>(497.27-618.53) | 0.19<br>(0.17-0.21)  | 6736.67<br>(6071.81-7425.01) | 7113.44<br>(6407.11-7867.10) | 0.17<br>(0.15-0.19)  | 238.56<br>(115.19-479.88) | 253.58<br>(123.06-510.55) | 0.19<br>(0.17-0.22)  |
| Western Sub-Saharan Africa   | 439.61<br>(387.27-489.07) | 483.84<br>(427.08-536.68) | 0.32<br>(0.30-0.33)  | 5494.22<br>(4872.02-6124.65) | 6075.81<br>(5385.72-6757.27) | 0.34<br>(0.32-0.35)  | 187.48<br>(90.32-378.77)  | 210.09<br>(101.11-424.67) | 0.39<br>(0.37-0.40)  |

**Table S2. Three regions with the top and bottom burden of osteoarthritis in 1990 and 2021**

| Period | Measure   | Top three regions         |             |                           |             |                           |             | Bottom three regions         |            |                            |           |                              |           |
|--------|-----------|---------------------------|-------------|---------------------------|-------------|---------------------------|-------------|------------------------------|------------|----------------------------|-----------|------------------------------|-----------|
|        |           | Both                      | Number      | Male                      | Number      | Female                    | Number      | Both                         | Number     | Male                       | Number    | Female                       | Number    |
| 1990   | Incident  | East Asia                 | 4836774.22  | East Asia                 | 1972643.65  | East Asia                 | 2864130.57  | Central Sub-Saharan Africa   | 122007.42  | Central Sub-Saharan Africa | 49165.54  | Central Sub-Saharan Africa   | 72841.88  |
|        |           | South Asia                | 2993307.58  | South Asia                | 1257621.54  | South Asia                | 1735686.04  | Andean Latin America         | 121136.54  | Andean Latin America       | 48355.01  | Andean Latin America         | 72781.53  |
|        |           | Western Europe            | 2630868.23  | Western Europe            | 997337.34   | Western Europe            | 1633530.89  | Oceania                      | 16658.74   | Oceania                    | 7517.23   | Oceania                      | 9141.51   |
|        | Prevalent | East Asia                 | 55506569.16 | East Asia                 | 22121960.82 | East Asia                 | 33384608.35 | Andean Latin America         | 1383605.90 | Andean Latin America       | 548064.67 | Andean Latin America         | 835541.23 |
|        |           | Western Europe            | 37369610.85 | South Asia                | 13427714.95 | Western Europe            | 24259326.27 | Central Sub-Saharan Africa   | 1314104.88 | Central Sub-Saharan Africa | 522232.87 | Central Sub-Saharan Africa   | 791872.00 |
|        |           | South Asia                | 32454744.62 | Western Europe            | 13110284.59 | South Asia                | 19027029.67 | Oceania                      | 176695.89  | Oceania                    | 80790.45  | Oceania                      | 95905.44  |
|        | DALYs     | East Asia                 | 1904131.52  | East Asia                 | 760997.72   | East Asia                 | 1143133.80  | Andean Latin America         | 48493.67   | Andean Latin America       | 18967.08  | Andean Latin America         | 29526.59  |
|        |           | Western Europe            | 1327348.42  | Western Europe            | 457342.37   | Western Europe            | 870006.06   | Central Sub-Saharan Africa   | 44741.36   | Central Sub-Saharan Africa | 17634.88  | Central Sub-Saharan Africa   | 27106.47  |
|        |           | South Asia                | 1094409.84  | South Asia                | 449545.68   | South Asia                | 644864.16   | Oceania                      | 6038.08    | Oceania                    | 2766.55   | Oceania                      | 3271.53   |
|        | ASIR      | High-income Asia Pacific  | 641.16      | High-income North America | 532.73      | High-income Asia Pacific  | 766.87      | North Africa and Middle East | 424.31     | Central Asia               | 349.85    | North Africa and Middle East | 472.96    |
|        |           | High-income North America | 605.72      | High-income Asia Pacific  | 502.22      | High-income North America | 672.08      | Eastern Sub-Saharan Africa   | 411.50     | South Asia                 | 348.16    | Eastern Sub-Saharan Africa   | 454.99    |
|        |           | Australasia               | 555.78      | Eastern Europe            | 499.99      | Australasia               | 643.06      | Southeast Asia               | 376.04     | Southeast Asia             | 325.31    | Southeast Asia               | 422.33    |
|        | ASPR      | High-income Asia Pacific  | 8071.98     | High-income North America | 7073.32     | High-income Asia Pacific  | 9418.06     | North Africa and Middle East | 5362.22    | Central Asia               | 4230.70   | North Africa and Middle East | 5966.24   |
|        |           | High-income North America | 7987.16     | Eastern Europe            | 6659.00     | High-income North America | 8730.46     | Eastern Sub-Saharan Africa   | 5113.71    | South Asia                 | 4230.70   | Eastern Sub-Saharan Africa   | 5676.39   |
|        |           | Eastern Europe            | 7541.08     | High-income Asia Pacific  | 6369.58     | Australasia               | 8188.50     | Southeast Asia               | 4796.58    | Southeast Asia             | 4230.70   | Southeast Asia               | 5293.77   |
|        | ASDR      | High-income Asia Pacific  | 291.10      | High-income North America | 250.06      | High-income Asia Pacific  | 343.72      | South Asia                   | 181.92     | Eastern Sub-Saharan Africa | 153.46    | North Africa and Middle East | 204.50    |
|        |           | High-income North America | 286.25      | Eastern Europe            | 232.73      | High-income North America | 315.22      | Eastern Sub-Saharan Africa   | 173.52     | Southeast Asia             | 144.01    | Eastern Sub-Saharan Africa   | 193.20    |
|        |           | Eastern Europe            | 265.83      | High-income Asia Pacific  | 223.69      | Australasia               | 292.26      | Southeast Asia               | 163.30     | South Asia                 | 142.91    | Southeast Asia               | 180.26    |

|      |                           |                           |                             |                             |                           |                           |                            |                            |                |                            |                            |                            |            |
|------|---------------------------|---------------------------|-----------------------------|-----------------------------|---------------------------|---------------------------|----------------------------|----------------------------|----------------|----------------------------|----------------------------|----------------------------|------------|
| 2021 | Incident                  | East Asia                 | 12051700.47                 | East Asia                   | 4826671.02                | East Asia                 | 7225029.45                 | Caribbean                  | 296169.90      | Caribbean                  | 124758.93                  | Caribbean                  | 171410.97  |
|      |                           | South Asia                | 8220377.67                  | South Asia                  | 3222647.24                | South Asia                | 4997730.43                 | Australasia                | 269451.73      | Australasia                | 111562.27                  | Australasia                | 157889.46  |
|      |                           | Western Europe            | 3918887.82                  | Western Europe              | 1564422.70                | Western Europe            | 2354465.12                 | Oceania                    | 47742.61       | Oceania                    | 20853.86                   | Oceania                    | 26888.76   |
|      | Prevalent                 | East Asia                 | 158285423.70                | East Asia                   | 62255515.86               | East Asia                 | 96029907.87                | Caribbean                  | 3852891.90     | Caribbean                  | 1591546.08                 | Caribbean                  | 2261345.82 |
|      |                           | South Asia                | 96531168.75                 | South Asia                  | 36747956.49               | South Asia                | 59783212.25                | Central Sub-Saharan Africa | 3517437.90     | Central Sub-Saharan Africa | 1427895.53                 | Central Sub-Saharan Africa | 2089542.37 |
|      |                           | Western Europe            | 59567388.69                 | Western Europe              | 22700410.39               | Western Europe            | 36866978.29                | Oceania                    | 508188.97      | Oceania                    | 226237.55                  | Oceania                    | 281951.42  |
|      | DALYs                     | East Asia                 | 5518037.40                  | East Asia                   | 2165589.00                | East Asia                 | 3352448.40                 | Caribbean                  | 135591.29      | Caribbean                  | 55485.64                   | Caribbean                  | 80105.65   |
|      |                           | South Asia                | 3311235.91                  | South Asia                  | 1245901.34                | South Asia                | 2065334.58                 | Central Sub-Saharan Africa | 120682.34      | Central Sub-Saharan Africa | 48733.10                   | Central Sub-Saharan Africa | 71949.25   |
|      |                           | Western Europe            | 2131317.24                  | Western Europe              | 797771.47                 | Western Europe            | 1333545.77                 | Oceania                    | 17457.20       | Oceania                    | 7772.48                    | Oceania                    | 9684.72    |
|      | ASIR                      | High-income Asia Pacific  | 682.07                      | High-income North America   | 558.51                    | High-income Asia Pacific  | 829.80                     | Central Sub-Saharan Africa | 463.08         | South Asia                 | 392.10                     | Central Sub-Saharan Africa | 514.86     |
|      |                           | High-income North America | 646.38                      | Southern Sub-Saharan Africa | 536.31                    | High-income North America | 729.65                     | Eastern Sub-Saharan Africa | 461.02         | Central Asia               | 382.15                     | Eastern Sub-Saharan Africa | 501.28     |
|      |                           | Australasia               | 620.09                      | High-income Asia Pacific    | 533.69                    | Australasia               | 708.49                     | Southeast Asia             | 437.13         | Southeast Asia             | 377.39                     | Southeast Asia             | 492.37     |
|      | ASPR                      | High-income Asia Pacific  | 8608.63                     | High-income North America   | 7344.41                   | High-income Asia Pacific  | 10345.22                   | Central Sub-Saharan Africa | 5940.49        | Central Asia               | 5000.14                    | Central Sub-Saharan Africa | 6591.36    |
|      |                           | High-income North America | 8421.62                     | Eastern Europe              | 6952.17                   | High-income North America | 9384.59                    | Eastern Sub-Saharan Africa | 5829.96        | Southeast Asia             | 4986.16                    | Eastern Sub-Saharan Africa | 6331.67    |
|      |                           | Australasia               | 7917.60                     | Southern Sub-Saharan Africa | 6835.26                   | Australasia               | 8979.31                    | Southeast Asia             | 5675.80        | South Asia                 | 4906.10                    | Southeast Asia             | 6280.17    |
| ASDR | High-income Asia Pacific  | 314.98                    | High-income North America   | 258.15                      | High-income Asia Pacific  | 384.97                    | Central Sub-Saharan Africa | 204.30                     | Central Asia   | 173.65                     | Central Sub-Saharan Africa | 227.76                     |            |
|      | High-income North America | 300.89                    | Eastern Europe              | 245.07                      | High-income North America | 338.83                    | Eastern Sub-Saharan Africa | 200.97                     | Southeast Asia | 172.20                     | Eastern Sub-Saharan Africa | 218.51                     |            |
|      | Australasia               | 283.38                    | Southern Sub-Saharan Africa | 238.88                      | Australasia               | 324.73                    | Southeast Asia             | 196.18                     | South Asia     | 165.97                     | Southeast Asia             | 217.15                     |            |



**Table S3. The incident case, prevalent case, DALYs and their changes of osteoarthritis among 204 countries and territories from 1990 to 2021**

| Country             | Incident case                      |                                    |                           | Prevalent case                        |                                       |                           | DALYs                            |                                    |                           |
|---------------------|------------------------------------|------------------------------------|---------------------------|---------------------------------------|---------------------------------------|---------------------------|----------------------------------|------------------------------------|---------------------------|
|                     | 1990                               | 2021                               | 1990-2021                 | 1990                                  | 2021                                  | 1990-2021                 | 1990                             | 2021                               | 1990-2021                 |
|                     | Both (95%UI)                       | Both (95%UI)                       | Change (%)                | Both (95%UI)                          | Both (95%UI)                          | Change (%)                | Both (95%UI)                     | Both (95%UI)                       | Change (%)                |
| Afghanistan         | 27287.14<br>(23791.40-30990.44)    | 57027.01<br>(49382.26-64358.73)    | 108.99<br>(94.53-123.73)  | 321991.29<br>(283428.68-361803.75)    | 546859.25<br>(480077.52-609142.83)    | 69.84<br>(61.98-78.43)    | 10777.63<br>(5227.44-21149.16)   | 18084.93<br>(8774.79-36668.69)     | 67.80<br>(59.04-77.24)    |
| Albania             | 9185.71<br>(8123.81-10211.06)      | 17460.82<br>(15374.09-19596.73)    | 90.09<br>(82.14-98.45)    | 106048.15<br>(94170.97-117357.18)     | 248148.77<br>(218659.47-276763.93)    | 134.00<br>(125.92-142.37) | 3648.68<br>(1770.33-7290.51)     | 8677.42<br>(4127.20-17605.22)      | 137.82<br>(128.70-147.86) |
| Algeria             | 58393.22<br>(51616.03-65377.18)    | 209506.85<br>(183863.57-233742.72) | 258.79<br>(245.55-272.37) | 677464.87<br>(597902.38-758233.11)    | 2432559.20<br>(2150380.55-2697828.39) | 259.07<br>(247.36-270.27) | 23230.05<br>(11038.45-47246.95)  | 84149.99<br>(40665.34-169768.89)   | 262.25<br>(248.84-276.36) |
| American Samoa      | 159.64<br>(139.93-178.21)          | 323.39<br>(283.81-361.15)          | 102.57<br>(94.50-110.52)  | 1736.72<br>(1537.19-1950.03)          | 3972.39<br>(3516.21-4396.81)          | 128.73<br>(121.12-135.92) | 60.82<br>(28.72-122.66)          | 138.44<br>(66.50-282.11)           | 127.65<br>(119.12-136.51) |
| Andorra             | 308.07<br>(272.45-344.21)          | 806.21<br>(714.75-900.19)          | 161.69<br>(152.78-171.04) | 3839.88<br>(3446.04-4260.12)          | 10783.66<br>(9708.90-11941.60)        | 180.83<br>(173.70-188.03) | 136.40<br>(65.57-277.15)         | 383.97<br>(184.47-765.25)          | 181.50<br>(174.02-191.39) |
| Angola              | 24000.87<br>(21032.81-26933.40)    | 83357.00<br>(72517.33-93086.30)    | 247.31<br>(235.91-258.64) | 252573.55<br>(218756.26-284310.81)    | 869768.55<br>(761428.36-975501.47)    | 244.36<br>(234.58-254.29) | 8723.32<br>(4124.01-17531.13)    | 30158.42<br>(14452.69-60591.86)    | 245.72<br>(232.86-257.99) |
| Antigua and Barbuda | 261.91<br>(234.54-289.52)          | 663.09<br>(581.25-741.16)          | 153.17<br>(144.41-163.06) | 3537.37<br>(3151.96-3899.99)          | 8259.78<br>(7313.21-9225.89)          | 133.50<br>(127.24-140.72) | 125.18<br>(59.09-252.46)         | 290.95<br>(138.89-585.96)          | 132.42<br>(124.55-141.24) |
| Argentina           | 175240.51<br>(154713.47-195453.94) | 311889.59<br>(277214.89-345791.60) | 77.98<br>(72.67-83.68)    | 2279648.28<br>(2035021.59-2531459.93) | 4194310.64<br>(3775256.87-4616497.10) | 83.99<br>(79.04-89.07)    | 80960.14<br>(38452.28-162324.99) | 150106.55<br>(71901.74-303301.74)  | 85.41<br>(79.39-91.32)    |
| Armenia             | 12389.73<br>(10850.76-13989.92)    | 19889.61<br>(17445.58-22467.64)    | 60.53<br>(54.59-66.86)    | 156998.66<br>(136161.01-177816.25)    | 296565.56<br>(256205.25-339560.73)    | 88.90<br>(82.10-96.17)    | 5466.94<br>(2629.43-10899.93)    | 10518.06<br>(5107.34-21121.97)     | 92.39<br>(84.34-100.34)   |
| Australia           | 103534.97<br>(92498.77-114683.22)  | 225080.14<br>(199821.48-251381.91) | 117.40<br>(110.30-124.99) | 1383918.40<br>(1243299.24-1529471.11) | 3294936.82<br>(2968752.85-3631540.28) | 138.09<br>(131.22-145.15) | 49047.85<br>(23740.21-98909.20)  | 118305.78<br>(58625.77-241248.79)  | 141.20<br>(132.64-149.53) |
| Austria             | 51884.78<br>(46358.05-57454.54)    | 78648.62<br>(70337.56-87916.28)    | 51.58<br>(47.46-56.38)    | 750066.72<br>(675574.61-827423.14)    | 1167787.79<br>(1058282.84-1289388.54) | 55.69<br>(51.91-59.80)    | 26566.64<br>(12792.12-53033.56)  | 41716.45<br>(20002.70-84033.57)    | 57.03<br>(52.39-62.41)    |
| Azerbaijan          | 25059.25<br>(21622.61-28310.85)    | 61652.84<br>(53118.12-70036.64)    | 146.03<br>(137.64-155.09) | 323778.81<br>(279068.31-372561.75)    | 771551.15<br>(660881.70-879386.85)    | 138.30<br>(129.72-146.95) | 11420.29<br>(5453.69-23077.56)   | 27347.57<br>(13226.90-54528.69)    | 139.46<br>(129.47-148.79) |
| Bahamas             | 993.23<br>(876.28-1107.19)         | 2722.32<br>(2370.90-3044.24)       | 174.09<br>(164.05-186.66) | 11361.45<br>(10136.65-12639.17)       | 32754.01<br>(28800.53-36382.87)       | 188.29<br>(180.03-197.38) | 402.66<br>(190.94-809.57)        | 1159.35<br>(558.16-2332.32)        | 187.92<br>(178.43-198.24) |
| Bahrain             | 1351.88<br>(1194.94-1500.38)       | 8147.28<br>(7061.02-9159.45)       | 502.66<br>(474.56-531.18) | 12686.25<br>(11231.54-14184.64)       | 80203.38<br>(70945.51-90083.32)       | 532.21<br>(511.00-553.10) | 438.81<br>(205.89-900.47)        | 2765.90<br>(1306.16-5571.85)       | 530.32<br>(507.75-557.83) |
| Bangladesh          | 223684.26<br>(198212.01-248765.26) | 690026.90<br>(612219.56-767880.58) | 208.48<br>(198.21-219.50) | 2470610.86<br>(2192025.94-2737062.55) | 8297327.05<br>(7370625.42-9214630.37) | 235.84<br>(225.54-245.94) | 83618.70<br>(40288.47-168313.21) | 284515.64<br>(137093.17-577735.07) | 240.25<br>(227.58-254.29) |
| Barbados            | 1359.66<br>(1202.53-1509.04)       | 2709.65<br>(2387.50-3047.14)       | 99.29<br>(90.32-107.32)   | 19303.96<br>(17252.74-21345.22)       | 38371.00<br>(33784.92-42487.32)       | 98.77<br>(93.12-104.20)   | 687.86<br>(321.83-1389.17)       | 1365.63<br>(649.64-2778.74)        | 98.53<br>(91.75-104.64)   |
| Belarus             | 63143.24<br>(55568.29-70531.80)    | 80484.3<br>(170517.89-90198.29)    | 27.46<br>(23.91-31.25)    | 894797.22<br>(788274.07-1008658.33)   | 1219042.64<br>(1073903.34-1368927.41) | 36.24<br>(32.60-39.95)    | 31504.48<br>(15062.61-64042.55)  | 43468.46<br>(20750.22-86959.82)    | 37.98<br>(33.28-42.60)    |
| Belgium             | 68465.60<br>(60991.54-76513.42)    | 97578.64<br>(86702.98-108987.00)   | 42.52<br>(38.44-47.40)    | 982108.45<br>(881171.33-1084366.44)   | 1478912.90<br>(1337143.06-1635290.53) | 50.59<br>(47.12-54.72)    | 34843.91<br>(16682.98-69416.58)  | 52625.47<br>(25527.62-106465.48)   | 51.03<br>(46.49-55.67)    |
| Belize              | 496.98<br>(440.28-550.02)          | 2061.49<br>(1815.72-2294.14)       | 314.81<br>(300.32-331.15) | 5979.89<br>(5313.62-6634.81)          | 23216.26<br>(20541.14-25750.71)       | 288.24<br>(276.60-302.31) | 209.83<br>(101.45-419.47)        | 816.83<br>(390.96-1663.82)         | 289.29<br>(275.97-305.81) |
| Benin               | 9508.32<br>(8400.25-10545.90)      | 32568.98<br>(28506.51-36258.31)    | 242.53<br>(230.12-253.58) | 106754.11<br>(94726.97-119330.90)     | 343780.31<br>(306791.56-381589.96)    | 222.03<br>(211.40-233.09) | 3618.89<br>(1742.58-7290.42)     | 11869.55<br>(5697.97-23986.80)     | 227.99<br>(214.86-241.00) |

|                                     |                                       |                                          |                           |                                          |                                             |                           |                                      |                                        |                           |
|-------------------------------------|---------------------------------------|------------------------------------------|---------------------------|------------------------------------------|---------------------------------------------|---------------------------|--------------------------------------|----------------------------------------|---------------------------|
| Bermuda                             | 384.12<br>(338.53-426.61)             | 670.47<br>(592.72-745.56)                | 74.55<br>(67.76-83.02)    | 4755.37<br>(4236.07-5249.93)             | 9996.99<br>(8837.57-10989.95)               | 110.23<br>(104.37-117.53) | 170.12<br>(80.51-345.29)             | 359.06<br>(172.79-735.43)              | 111.06<br>(104.01-119.13) |
| Bhutan                              | 1259.13<br>(1111.55-1408.84)          | 3180.50<br>(2819.72-3532.29)             | 152.60<br>(144.30-161.59) | 13318.69<br>(11793.63-14892.34)          | 37238.23<br>(33076.40-41199.34)             | 179.59<br>(170.35-189.61) | 452.93<br>(219.90-908.85)            | 1281.59<br>(621.12-2600.86)            | 182.96<br>(171.36-194.61) |
| Bolivia<br>(Plurinational State of) | 18351.33<br>(16218.11-20443.03)       | 57029.84<br>(50392.13-63358.58)          | 210.77<br>(200.87-220.54) | 203683.60<br>(180657.93-226607.72)       | 666485.83<br>(590520.74-738699.58)          | 227.22<br>(216.97-237.31) | 7050.14<br>(3371.39-14207.89)        | 23288.59<br>(11170.09-47119.68)        | 230.33<br>(218.43-242.62) |
| Bosnia and<br>Herzegovina           | 19585.38<br>(17166.30-21960.72)       | 26326.54<br>(23132.59-29466.07)          | 34.42<br>(28.99-39.92)    | 234845.20<br>(206726.13-262201.70)       | 391736.09<br>(346442.37-440350.45)          | 66.81<br>(60.57-73.22)    | 8100.04<br>(3852.38-16233.06)        | 13707.03<br>(6542.58-27707.40)         | 69.22<br>(61.94-76.64)    |
| Botswana                            | 3011.99<br>(2675.04-3378.67)          | 10298.12<br>(9102.60-11420.24)           | 241.90<br>(229.19-254.36) | 33411.74<br>(29776.22-37407.51)          | 109840.34<br>(97516.75-122269.24)           | 228.75<br>(218.62-238.85) | 1156.19<br>(547.72-2324.35)          | 3800.02<br>(1831.39-7654.76)           | 228.67<br>(217.89-241.46) |
| Brazil                              | 538758.49<br>(474540.52-599987.99)    | 1533312.78<br>(1353748.32-1694669.80)    | 184.60<br>(179.87-189.11) | 6033181.80<br>(5347514.03-6684708.36)    | 18970857.79<br>(16804901.87-21077260.10)    | 214.44<br>(210.36-218.66) | 208123.58<br>(99503.48-418167.95)    | 663901.66<br>(318773.54-1339004.65)    | 218.99<br>(214.05-224.24) |
| Brunei Darussalam                   | 906.73<br>(797.36-1003.88)            | 3203.59<br>(2817.53-3554.52)             | 253.31<br>(239.69-266.33) | 9011.38<br>(8058.41-9964.31)             | 34031.74<br>(30247.67-37597.12)             | 277.65<br>(266.87-288.94) | 321.78<br>(153.33-649.16)            | 1223.46<br>(582.86-2448.41)            | 280.22<br>(267.22-293.12) |
| Bulgaria                            | 57146.41<br>(50341.94-64002.68)       | 59409.74<br>(52593.76-65848.04)          | 3.96<br>(0.39-7.53)       | 791590.39<br>(692118.02-88939.47)        | 936043.36<br>(826382.05-1044846.14)         | 18.25<br>(14.88-21.59)    | 27784.25<br>(13266.96-55751.93)      | 33206.64<br>(16137.48-67206.41)        | 19.52<br>(15.87-23.85)    |
| Burkina Faso                        | 19593.17<br>(17143.28-21970.66)       | 49304.03<br>(43078.96-54825.90)          | 151.64<br>(142.32-161.04) | 217159.12<br>(192068.00-243494.94)       | 521316.59<br>(463357.74-586311.20)          | 140.06<br>(132.63-148.10) | 7331.69<br>(3537.23-14818.35)        | 17798.28<br>(8611.92-35905.27)         | 142.76<br>(133.44-152.05) |
| Burundi                             | 10533.50<br>(9293.49-11673.84)        | 26111.53<br>(22939.76-29320.36)          | 147.89<br>(140.45-155.14) | 116072.34<br>(103027.25-129637.18)       | 264422.54<br>(233713.33-296285.47)          | 127.81<br>(121.50-134.85) | 3955.43<br>(1913.25-7939.87)         | 9035.49<br>(4359.22-18146.02)          | 128.43<br>(120.79-137.76) |
| Cabo Verde                          | 877.51<br>(774.37-988.10)             | 2532.98<br>(2238.00-2844.88)             | 188.66<br>(175.76-200.88) | 11780.94<br>(10397.80-13212.12)          | 29550.82<br>(26139.30-32888.11)             | 150.84<br>(141.20-160.24) | 405.14<br>(195.79-813.01)            | 1027.46<br>(494.19-2071.01)            | 153.61<br>(142.44-165.08) |
| Cambodia                            | 18793.04<br>(16448.32-21070.10)       | 56902.76<br>(50230.93-63537.98)          | 202.79<br>(191.84-216.01) | 204929.54<br>(181011.33-228887.53)       | 659749.49<br>(587709.16-739198.60)          | 221.94<br>(209.71-234.60) | 6904.52<br>(3331.86-14077.32)        | 22484.74<br>(10740.19-45064.47)        | 225.65<br>(211.08-241.01) |
| Cameroon                            | 23980.27<br>(21000.70-26764.92)       | 82772.35<br>(73055.74-92139.82)          | 245.17<br>(231.78-257.42) | 259289.49<br>(230455.47-290263.92)       | 852478.86<br>(762205.78-940130.55)          | 228.77<br>(217.69-239.78) | 8831.21<br>(4271.94-17831.07)        | 29381.20<br>(14159.32-59080.32)        | 232.70<br>(219.97-246.46) |
| Canada                              | 128827.85<br>(114244.35-144137.73)    | 263975.92<br>(232772.41-297164.84)       | 104.91<br>(97.85-111.89)  | 1824017.73<br>(1600678.65-2046086.79)    | 4163156.38<br>(3679838.46-4663100.96)       | 128.24<br>(122.10-133.97) | 63957.74<br>(31071.65-130702.97)     | 146844.93<br>(71051.19-296531.55)      | 129.60<br>(121.61-137.44) |
| Central African<br>Republic         | 5883.78<br>(5145.16-6580.74)          | 13041.90<br>(11395.03-14582.93)          | 121.66<br>(113.19-129.27) | 61668.37<br>(54203.05-68965.73)          | 129289.96<br>(114759.95-144249.08)          | 109.65<br>(102.31-116.53) | 2079.57<br>(1000.01-4212.52)         | 4377.99<br>(2111.72-8874.33)           | 110.52<br>(101.96-119.62) |
| Chad                                | 12181.15<br>(10745.41-13630.81)       | 30986.72<br>(27232.40-34601.58)          | 154.38<br>(145.00-165.12) | 139179.70<br>(123429.64-155558.52)       | 318880.39<br>(282303.88-358853.94)          | 129.11<br>(120.68-138.49) | 4708.41<br>(2276.20-9519.13)         | 10825.32<br>(5277.49-21890.88)         | 129.91<br>(119.83-140.17) |
| Chile                               | 58213.53<br>(51807.45-64572.81)       | 145187.62<br>(129824.00-162035.35)       | 149.41<br>(140.75-157.90) | 701689.44<br>(626386.77-776446.26)       | 1951585.56<br>(1759442.64-2155187.41)       | 178.13<br>(169.93-186.00) | 24661.87<br>(11880.33-50150.57)      | 69420.82<br>(33532.08-138325.97)       | 181.49<br>(171.91-191.12) |
| China                               | 4654141.48<br>(4075192.05-5212885.65) | 11652721.19<br>(10207638.21-13107929.18) | 150.37<br>(142.75-157.10) | 53352514.68<br>(46603087.10-59685781.45) | 152848105.93<br>(134655962.16-170842262.84) | 186.49<br>(179.62-192.93) | 1829415.63<br>(880107.77-3682519.91) | 5327389.98<br>(2541781.20-10678674.95) | 191.21<br>(183.62-198.69) |
| Colombia                            | 104721.43<br>(93002.31-117050.64)     | 311332.96<br>(273697.43-346614.46)       | 197.30<br>(186.34-208.86) | 1169852.16<br>(1033377.13-1299615.46)    | 4025156.32<br>(3565880.18-4466444.72)       | 244.07<br>(233.32-255.40) | 40679.96<br>(19449.83-81303.31)      | 142072.89<br>(67444.44-289099.67)      | 249.25<br>(235.03-262.05) |
| Comoros                             | 956.02<br>(837.75-1072.32)            | 2635.83<br>(2323.09-2942.15)             | 175.71<br>(166.33-184.21) | 10342.70<br>(9169.82-11583.52)           | 29374.78<br>(25981.92-32840.57)             | 184.01<br>(174.26-193.01) | 353.04<br>(170.19-715.41)            | 1012.17<br>(485.55-2055.19)            | 186.70<br>(175.23-197.46) |
| Congo                               | 5796.06<br>(5101.27-6478.71)          | 19068.59<br>(16720.31-21208.70)          | 228.99<br>(216.45-241.66) | 65397.22<br>(57773.19-72900.54)          | 196134.98<br>(174147.16-218303.13)          | 199.91<br>(189.93-209.39) | 2254.86<br>(1070.60-4562.74)         | 6791.77<br>(3215.27-13707.01)          | 201.21<br>(189.73-213.07) |
| Cook Islands                        | 74.93<br>(66.09-83.69)                | 140.94<br>(124.11-157.69)                | 88.10<br>(81.13-95.99)    | 892.11<br>(791.93-990.89)                | 2010.43<br>(1774.72-2225.18)                | 125.36<br>(117.58-132.99) | 31.17<br>(14.92-61.02)               | 70.64<br>(34.04-142.35)                | 126.60<br>(118.31-135.46) |
| Costa Rica                          | 9940.82<br>(8816.29-11032.31)         | 31516.89<br>(27880.71-35173.45)          | 217.05<br>(205.51-227.57) | 115531.98<br>(102589.18-127712.24)       | 404928.35<br>(358473.04-447915.59)          | 250.49<br>(240.31-260.42) | 4031.73<br>(1924.49-8121.14)         | 14231.75<br>(6859.95-28750.09)         | 252.99<br>(241.13-264.18) |
| Croatia                             | 29753.09<br>(26249.29-33364.16)       | 35691.03<br>(31552.11-39616.34)          | 19.96<br>(15.66-24.69)    | 395928.51<br>(347321.39-445002.64)       | 565409.43<br>(499041.10-630962.62)          | 42.81<br>(38.67-47.05)    | 13849.69<br>(6614.20-28014.50)       | 19990.65<br>(9654.29-40472.21)         | 44.34<br>(39.42-49.51)    |

|                                       |                                    |                                    |                           |                                       |                                       |                           |                                   |                                    |                           |
|---------------------------------------|------------------------------------|------------------------------------|---------------------------|---------------------------------------|---------------------------------------|---------------------------|-----------------------------------|------------------------------------|---------------------------|
| Cuba                                  | 52466.00<br>(46435.46-58324.29)    | 99435.27<br>(87342.40-111905.97)   | 89.52<br>(82.27-97.67)    | 659381.32<br>(583439.64-733482.26)    | 1372809.99<br>(1213433.06-1525482.71) | 108.20<br>(102.48-114.38) | 23141.68<br>(11051.41-46779.99)   | 48463.88<br>(23028.96-97796.59)    | 109.42<br>(102.02-116.29) |
| Cyprus                                | 4013.93<br>(3569.11-4449.11)       | 10305.97<br>(9253.59-11402.55)     | 156.76<br>(148.78-165.36) | 51643.29<br>(46463.25-57278.09)       | 139029.87<br>(124996.46-153247.27)    | 169.21<br>(162.33-176.49) | 1817.83<br>(872.79-3643.38)       | 4955.66<br>(2402.53-9910.35)       | 172.61<br>(164.46-182.03) |
| Czechia                               | 64113.83<br>(56721.67-72019.40)    | 91249.26<br>(81003.96-101781.74)   | 42.32<br>(37.75-46.55)    | 907575.23<br>(800750.92-1018733.77)   | 1420152.14<br>(1247133.11-1591851.31) | 56.48<br>(52.49-60.65)    | 31730.75<br>(15387.70-64336.89)   | 50206.82<br>(24413.49-101810.86)   | 58.23<br>(53.42-63.48)    |
| Côte d'Ivoire                         | 23224.20<br>(20351.59-25968.09)    | 73190.20<br>(63803.77-81621.09)    | 215.15<br>(204.97-225.04) | 230694.22<br>(205327.51-256963.09)    | 733425.47<br>(653903.50-817875.59)    | 217.92<br>(208.12-227.62) | 7780.95<br>(3776.21-15610.06)     | 25227.82<br>(12158.00-51055.60)    | 224.23<br>(211.30-236.40) |
| Democratic People's Republic of Korea | 90678.62<br>(79002.70-103016.81)   | 175530.47<br>(153632.18-197148.03) | 93.57<br>(84.19-101.89)   | 1049463.99<br>(928192.12-1174686.51)  | 2222257.29<br>(1964539.46-2482777.60) | 111.75<br>(101.53-120.33) | 36130.55<br>(17172.37-72746.09)   | 77009.62<br>(37281.74-155704.45)   | 113.14<br>(102.47-123.93) |
| Democratic Republic of the Congo      | 82694.31<br>(72457.72-92054.28)    | 213656.55<br>(186933.96-237905.56) | 158.37<br>(149.69-167.12) | 891752.44<br>(786537.97-994780.98)    | 2209192.10<br>(1952823.80-2450224.17) | 147.74<br>(139.83-154.89) | 30223.05<br>(14461.50-61245.11)   | 75436.98<br>(35464.48-151454.24)   | 149.60<br>(139.89-158.64) |
| Denmark                               | 36836.64<br>(32957.21-40594.90)    | 48847.84<br>(43444.12-54516.68)    | 32.61<br>(27.23-38.73)    | 543684.57<br>(485653.43-603097.84)    | 744525.08<br>(669360.85-823259.52)    | 36.94<br>(30.76-43.72)    | 19537.51<br>(9558.00-39975.81)    | 26730.06<br>(12922.90-54646.46)    | 36.81<br>(29.78-44.67)    |
| Djibouti                              | 781.05<br>(686.81-876.05)          | 4367.79<br>(3830.24-4867.23)       | 459.22<br>(438.81-482.03) | 7545.72<br>(6712.94-8440.38)          | 43542.62<br>(38604.56-48600.45)       | 477.05<br>(456.94-497.66) | 258.78<br>(124.05-522.18)         | 1513.32<br>(720.02-3030.18)        | 484.79<br>(460.33-511.48) |
| Dominica                              | 285.45<br>(254.40-316.27)          | 469.16<br>(413.65-522.71)          | 64.36<br>(58.51-70.14)    | 3753.89<br>(3340.68-4163.48)          | 6092.77<br>(5387.90-6793.40)          | 62.31<br>(57.67-67.28)    | 131.68<br>(63.23-266.59)          | 214.28<br>(102.56-429.25)          | 62.73<br>(57.52-68.51)    |
| Dominican Republic                    | 21754.22<br>(19211.65-24251.40)    | 60247.27<br>(53094.73-67341.16)    | 176.95<br>(168.48-186.37) | 247859.76<br>(219596.97-275061.42)    | 737841.02<br>(654420.77-816064.74)    | 197.68<br>(189.64-206.65) | 8702.35<br>(4128.44-17379.75)     | 25997.26<br>(12460.17-52425.54)    | 198.74<br>(188.69-209.14) |
| Ecuador                               | 32268.04<br>(28495.96-35886.48)    | 100807.30<br>(88994.85-111969.16)  | 212.41<br>(201.60-222.80) | 366819.69<br>(326443.66-403917.82)    | 1246863.63<br>(1106360.22-1378365.25) | 239.91<br>(229.76-250.01) | 12889.78<br>(6151.41-25626.59)    | 44084.07<br>(21040.07-87905.46)    | 242.01<br>(230.48-253.43) |
| Egypt                                 | 145297.21<br>(127232.23-162962.00) | 395500.13<br>(346708.88-441377.26) | 172.20<br>(161.87-181.40) | 1545496.84<br>(1357026.50-1727343.32) | 4288855.64<br>(3812604.45-4764960.99) | 177.51<br>(167.13-186.32) | 52976.93<br>(25225.48-107326.45)  | 147792.63<br>(71251.85-303928.39)  | 178.98<br>(167.94-190.48) |
| El Salvador                           | 16197.47<br>(14204.34-17967.28)    | 34373.97<br>(30447.28-38032.10)    | 112.22<br>(105.49-119.52) | 191965.61<br>(169692.56-213064.51)    | 443375.15<br>(395271.73-487949.71)    | 130.97<br>(124.47-138.44) | 6668.21<br>(3151.57-13493.65)     | 15547.76<br>(7438.88-31269.02)     | 133.16<br>(125.69-142.66) |
| Equatorial Guinea                     | 929.05<br>(812.62-1043.91)         | 3776.05<br>(3310.50-4195.17)       | 306.44<br>(286.46-327.64) | 10007.26<br>(8846.77-11210.93)        | 37815.17<br>(33405.54-42295.39)       | 277.88<br>(261.45-295.77) | 336.01<br>(163.76-681.50)         | 1308.13<br>(622.68-2612.33)        | 289.31<br>(270.26-310.99) |
| Eritrea                               | 6019.71<br>(5274.97-6752.18)       | 16112.85<br>(14178.94-18023.32)    | 167.67<br>(157.09-178.34) | 57678.48<br>(51105.32-64536.90)       | 159725.62<br>(141263.01-178274.41)    | 176.92<br>(166.72-186.93) | 1954.85<br>(934.37-3916.13)       | 5430.56<br>(2571.64-10768.52)      | 177.80<br>(163.62-190.58) |
| Estonia                               | 10258.10<br>(9077.34-11433.97)     | 11714.70<br>(10394.73-13129.72)    | 14.20<br>(10.61-18.23)    | 147423.89<br>(129808.22-165855.44)    | 194934.07<br>(171215.15-218687.17)    | 32.23<br>(28.58-35.84)    | 5205.46<br>(2497.89-10404.20)     | 7009.67<br>(3367.59-14039.51)      | 34.66<br>(30.00-39.40)    |
| Eswatini                              | 1688.03<br>(1487.87-1891.38)       | 3821.29<br>(3366.88-4244.42)       | 126.38<br>(117.44-134.72) | 17749.15<br>(15782.33-19682.37)       | 40512.49<br>(36024.77-45098.67)       | 128.25<br>(120.20-136.45) | 613.89<br>(291.83-1241.89)        | 1392.87<br>(670.26-2793.90)        | 126.89<br>(117.70-137.22) |
| Ethiopia                              | 99638.17<br>(87384.88-111461.84)   | 270741.86<br>(237202.63-300718.03) | 171.73<br>(161.96-180.80) | 1040402.55<br>(920397.03-1164693.65)  | 2881339.99<br>(2528598.05-3201411.61) | 176.94<br>(166.27-187.31) | 35251.73<br>(16935.10-71267.94)   | 100011.78<br>(47612.03-199996.70)  | 183.71<br>(171.57-195.04) |
| Fiji                                  | 2368.63<br>(2091.44-2655.62)       | 5074.51<br>(4459.45-5702.04)       | 114.24<br>(105.50-123.02) | 24590.71<br>(21890.82-27545.86)       | 60348.78<br>(53323.43-67176.20)       | 145.41<br>(136.77-153.43) | 848.38<br>(405.51-1689.36)        | 2098.46<br>(1015.88-4237.81)       | 147.35<br>(136.37-157.06) |
| Finland                               | 33541.08<br>(29882.46-37178.18)    | 49029.86<br>(43897.84-54528.36)    | 46.18<br>(40.76-51.40)    | 461234.50<br>(417021.55-508410.45)    | 782910.16<br>(706234.31-867239.94)    | 69.74<br>(65.07-74.34)    | 16276.74<br>(7927.66-32884.35)    | 27939.39<br>(13503.13-56189.50)    | 71.65<br>(66.55-77.51)    |
| France                                | 365820.91<br>(325843.18-407123.37) | 558962.11<br>(496888.97-624475.41) | 52.80<br>(48.50-58.04)    | 5232168.25<br>(4717987.83-5780825.67) | 8701539.81<br>(7878884.73-9534116.68) | 66.31<br>(62.20-70.60)    | 185036.14<br>(89539.89-372835.49) | 310427.51<br>(150026.94-625920.60) | 67.77<br>(62.75-73.27)    |
| Gabon                                 | 2703.35<br>(2373.30-3026.86)       | 6801.14<br>(5969.26-7587.90)       | 151.58<br>(141.83-160.92) | 32706.04<br>(28948.16-36480.07)       | 75237.14<br>(67262.57-83892.72)       | 130.04<br>(122.63-138.33) | 1124.54<br>(539.36-2295.03)       | 2609.06<br>(1240.78-5238.45)       | 132.01<br>(122.66-141.50) |
| Gambia                                | 1848.90<br>(1624.41-2066.21)       | 6002.80<br>(5266.59-6646.15)       | 224.67<br>(212.99-235.79) | 19411.31<br>(17255.44-21783.29)       | 64113.82<br>(56832.18-70970.49)       | 230.29<br>(218.29-241.85) | 664.08<br>(321.13-1334.01)        | 2214.59<br>(1060.95-4490.50)       | 233.48<br>(218.48-247.20) |
| Georgia                               | 27867.53<br>(24387.12-31363.36)    | 24890.41<br>(21859.79-27991.84)    | -10.68<br>(-13.67--7.68)  | 383419.92<br>(332432.40-434597.41)    | 383788.96<br>(333862.79-434176.64)    | 0.10<br>(-2.97-3.21)      | 13507.47<br>(6569.29-27037.37)    | 13535.84<br>(6550.61-27155.19)     | 0.21<br>(-3.54-3.89)      |

|                               |                                       |                                       |                           |                                          |                                          |                           |                                     |                                       |                           |
|-------------------------------|---------------------------------------|---------------------------------------|---------------------------|------------------------------------------|------------------------------------------|---------------------------|-------------------------------------|---------------------------------------|---------------------------|
| Germany                       | 579625.02<br>(515357.90-644918.67)    | 787712.39<br>(698574.45-873750.11)    | 35.90<br>(31.64-40.65)    | 8283522.19<br>(7453152.16-9115020.16)    | 12268606.80<br>(11049241.94-13609527.68) | 48.11<br>(44.11-51.56)    | 294049.23<br>(142784.64-593358.30)  | 437790.86<br>(215922.65-879846.36)    | 48.88<br>(43.84-53.50)    |
| Ghana                         | 37544.76<br>(32916.40-41932.30)       | 110975.97<br>(96894.81-123575.19)     | 195.58<br>(186.02-206.87) | 411219.36<br>(361888.03-458705.81)       | 1183031.13<br>(1050661.29-1309266.24)    | 187.69<br>(178.44-198.43) | 14299.58<br>(6761.04-28809.14)      | 41273.33<br>(19680.79-82749.66)       | 188.63<br>(176.95-201.79) |
| Greece                        | 68731.58<br>(61358.99-77471.38)       | 92595.48<br>(82685.76-102213.93)      | 34.72<br>(29.08-39.47)    | 936119.70<br>(843678.89-1038256.66)      | 1436278.45<br>(1297936.74-1588189.63)    | 53.43<br>(48.44-57.74)    | 32944.31<br>(15987.31-66126.53)     | 51134.34<br>(24852.32-103742.30)      | 55.21<br>(49.96-60.33)    |
| Greenland                     | 191.57<br>(167.37-215.74)             | 355.46<br>(311.36-401.72)             | 85.55<br>(75.45-95.94)    | 2090.33<br>(1831.10-2337.98)             | 4610.22<br>(4034.08-5172.24)             | 120.55<br>(112.65-127.83) | 72.35<br>(34.63-148.00)             | 162.20<br>(78.22-326.78)              | 124.17<br>(114.31-133.49) |
| Grenada                       | 313.17<br>(279.61-346.44)             | 682.40<br>(601.65-764.37)             | 117.90<br>(108.45-128.23) | 4378.35<br>(3881.50-4886.00)             | 8483.62<br>(7510.71-9412.90)             | 93.76<br>(87.10-100.32)   | 153.47<br>(73.79-309.41)            | 297.28<br>(141.80-600.57)             | 93.71<br>(86.28-101.15)   |
| Guam                          | 525.08<br>(460.61-585.83)             | 1156.80<br>(1019.10-1289.41)          | 120.31<br>(109.74-131.00) | 5724.05<br>(5078.31-6418.67)             | 16202.16<br>(14300.39-17994.77)          | 183.05<br>(172.08-193.56) | 201.86<br>(96.92-404.67)            | 576.88<br>(277.95-1150.01)            | 185.78<br>(174.33-199.59) |
| Guatemala                     | 19813.99<br>(17425.97-21949.64)       | 63651.95<br>(56005.20-70927.60)       | 221.25<br>(211.66-233.36) | 214789.96<br>(190429.18-238337.88)       | 748843.34<br>(663036.55-831469.32)       | 248.64<br>(238.90-260.55) | 7374.50<br>(3516.16-14877.88)       | 25805.62<br>(12422.04-52785.37)       | 249.93<br>(237.49-263.44) |
| Guinea                        | 14609.02<br>(12924.97-16365.56)       | 29813.74<br>(26205.26-33039.84)       | 104.08<br>(96.59-111.78)  | 167938.02<br>(148986.97-187462.09)       | 320099.56<br>(284903.23-358791.66)       | 90.61<br>(83.78-97.15)    | 5700.16<br>(2768.42-11612.48)       | 10941.10<br>(5275.45-21930.95)        | 91.94<br>(84.29-99.90)    |
| Guinea-Bissau                 | 1958.89<br>(1718.92-2193.52)          | 4439.20<br>(3882.55-4936.63)          | 126.62<br>(118.03-134.84) | 20806.93<br>(18382.44-23276.36)          | 43794.78<br>(38803.14-48753.24)          | 110.48<br>(103.67-117.17) | 705.20<br>(344.95-1425.89)          | 1497.58<br>(715.81-2994.93)           | 112.36<br>(103.52-120.73) |
| Guyana                        | 2239.53<br>(1980.51-2486.45)          | 4056.52<br>(3553.92-4547.71)          | 81.13<br>(73.87-87.79)    | 24709.67<br>(21920.59-27494.33)          | 48016.70<br>(42379.57-53318.82)          | 94.32<br>(87.26-99.98)    | 848.84<br>(406.54-1720.27)          | 1659.59<br>(797.39-3733.31)           | 95.51<br>(87.75-102.05)   |
| Haiti                         | 16740.09<br>(14742.48-18656.33)       | 44247.15<br>(39083.19-49488.76)       | 164.32<br>(154.71-174.24) | 180842.66<br>(161578.40-203285.33)       | 461322.52<br>(408504.21-515425.72)       | 155.10<br>(145.88-163.86) | 6139.73<br>(2993.49-12364.46)       | 15722.29<br>(7588.42-31426.85)        | 156.07<br>(145.72-167.55) |
| Honduras                      | 11445.56<br>(10046.37-12716.05)       | 39418.14<br>(34602.20-43968.59)       | 244.40<br>(233.72-256.17) | 127604.09<br>(112175.55-142053.65)       | 446901.99<br>(397249.99-497171.51)       | 250.23<br>(241.27-260.69) | 4415.74<br>(2127.23-8787.25)        | 15482.73<br>(7462.67-31056.56)        | 250.63<br>(239.87-263.66) |
| Hungary                       | 68521.47<br>(60690.56-76505.92)       | 84064.81<br>(74011.72-93556.28)       | 22.68<br>(18.80-26.43)    | 970946.61<br>(856018.03-1089127.31)      | 1310359.18<br>(1158647.09-1472743.41)    | 34.96<br>(31.46-38.40)    | 33900.37<br>(16393.85-68585.64)     | 46542.49<br>(22389.95-93905.81)       | 37.29<br>(33.00-41.41)    |
| Iceland                       | 1419.37<br>(1269.63-1569.62)          | 2753.77<br>(2458.83-3049.80)          | 94.01<br>(86.39-101.47)   | 19611.01<br>(17550.22-21782.15)          | 40058.36<br>(36184.11-44272.24)          | 104.26<br>(96.16-111.85)  | 706.58<br>(345.79-1451.70)          | 1447.42<br>(705.50-2897.03)           | 104.85<br>(94.86-114.71)  |
| India                         | 2474842.12<br>(2182570.85-2747485.14) | 6701764.08<br>(5911471.07-7428209.67) | 170.80<br>(165.73-175.74) | 26639507.16<br>(23639835.22-29480348.87) | 79214251.02<br>(70296947.65-87586539.76) | 197.36<br>(191.83-203.39) | 897470.86<br>(433854.40-1802635.58) | 2718457.05<br>(1302654.53-5462599.64) | 202.90<br>(196.48-209.82) |
| Indonesia                     | 457055.30<br>(400852.38-509725.69)    | 1308805.81<br>(1146853.19-1469964.88) | 186.36<br>(180.53-192.70) | 4983948.48<br>(4411432.41-5586203.05)    | 14891306.50<br>(13109591.73-16672857.83) | 198.79<br>(192.65-205.58) | 170423.96<br>(81686.92-343678.02)   | 516616.26<br>(245937.64-1031740.82)   | 203.14<br>(195.93-210.90) |
| Iran<br>(Islamic Republic of) | 132275.54<br>(116401.28-147760.95)    | 449414.40<br>(395815.84-499366.80)    | 239.76<br>(233.35-246.65) | 1469041.32<br>(1295481.49-1641745.77)    | 5083977.42<br>(4515256.82-5645682.27)    | 246.07<br>(240.74-251.73) | 50356.09<br>(24041.12-101206.43)    | 175263.35<br>(83503.05-351986.30)     | 248.05<br>(242.26-254.61) |
| Iraq                          | 40791.43<br>(35892.06-45167.52)       | 149558.21<br>(130580.64-167726.17)    | 266.64<br>(254.59-280.02) | 462766.89<br>(411019.96-512938.21)       | 1615817.36<br>(1436788.21-1801750.95)    | 249.16<br>(239.06-259.93) | 15832.91<br>(7529.69-31775.40)      | 54964.14<br>(26620.05-111028.98)      | 247.15<br>(234.15-259.65) |
| Ireland                       | 18952.62<br>(16953.86-20966.30)       | 38498.71<br>(34402.66-42749.67)       | 103.13<br>(97.32-109.86)  | 259982.82<br>(232118.82-287443.39)       | 532942.69<br>(479969.35-589994.26)       | 104.99<br>(99.61-110.10)  | 9216.68<br>(4439.55-18587.97)       | 19052.17<br>(9230.39-38296.94)        | 106.71<br>(100.35-112.99) |
| Israel                        | 23382.42<br>(20990.96-25916.57)       | 58968.86<br>(52884.43-65862.66)       | 152.19<br>(144.28-158.83) | 312003.67<br>(280035.35-345863.29)       | 821935.73<br>(742487.46-906819.96)       | 163.44<br>(157.41-169.59) | 11092.53<br>(5293.47-22314.96)      | 29412.45<br>(14049.79-59274.77)       | 165.16<br>(157.89-173.16) |
| Italy                         | 415924.73<br>(369369.27-465184.00)    | 595991.15<br>(530002.05-664508.76)    | 43.29<br>(41.15-45.53)    | 5826406.63<br>(5210209.46-6466884.18)    | 9171839.29<br>(8231986.28-10143387.16)   | 57.42<br>(55.59-59.46)    | 206444.99<br>(99871.63-413613.59)   | 328910.43<br>(159768.21-663710.96)    | 59.32<br>(57.14-61.60)    |
| Jamaica                       | 8487.99<br>(7542.14-9431.57)          | 17246.76<br>(15255.65-19199.34)       | 103.19<br>(96.78-110.22)  | 111740.41<br>(99300.49-124096.12)        | 221285.81<br>(197000.13-244088.71)       | 98.04<br>(93.14-104.67)   | 3937.80<br>(1874.53-7953.26)        | 7804.75<br>(3738.67-15767.42)         | 98.20<br>(92.19-105.78)   |
| Japan                         | 1083158.09<br>(956009.66-1200740.90)  | 1510140.68<br>(1348295.04-1664133.39) | 39.42<br>(34.48-44.67)    | 13672546.22<br>(12142308.67-15127789.68) | 25378142.19<br>(22883664.81-27840274.16) | 85.61<br>(81.32-90.94)    | 493607.60<br>(237042.85-994223.83)  | 939484.99<br>(450468.54-1907691.61)   | 90.33<br>(85.18-96.13)    |
| Jordan                        | 7851.69<br>(6901.51-8788.87)          | 51742.34<br>(45551.99-57344.94)       | 559.00<br>(540.91-580.77) | 83781.76<br>(73939.73-93468.72)          | 560038.55<br>(499447.26-624459.51)       | 568.45<br>(550.94-589.85) | 2886.27<br>(1381.40-5762.06)        | 19358.87<br>(9213.75-38956.11)        | 570.72<br>(546.55-596.09) |

|                                     |                                    |                                    |                           |                                       |                                         |                           |                                   |                                    |                           |
|-------------------------------------|------------------------------------|------------------------------------|---------------------------|---------------------------------------|-----------------------------------------|---------------------------|-----------------------------------|------------------------------------|---------------------------|
| Kazakhstan                          | 64184.63<br>(56185.52-72297.88)    | 109192.03<br>(95013.72-122962.51)  | 70.12<br>(64.66-75.47)    | 831969.93<br>(719540.75-950666.79)    | 1438645.55<br>(1254327.49-1650412.67)   | 72.92<br>(67.20-78.26)    | 29186.07<br>(13995.08-58956.77)   | 51049.60<br>(24478.99-103160.59)   | 74.91<br>(68.12-81.80)    |
| Kenya                               | 43388.94<br>(38339.81-48283.16)    | 151394.48<br>(132774.60-168327.27) | 248.92<br>(242.27-255.15) | 470145.02<br>(416631.36-523478.38)    | 1600840.38<br>(1411451.46-1776032.71)   | 240.50<br>(233.74-247.20) | 16150.49<br>(7727.88-32612.75)    | 55737.26<br>(26430.41-112102.99)   | 245.11<br>(238.04-252.68) |
| Kiribati                            | 223.50<br>(195.57-249.36)          | 496.41<br>(435.91-555.58)          | 122.10<br>(114.17-129.35) | 2482.17<br>(2202.99-2782.02)          | 5506.49<br>(4882.55-6151.79)            | 121.84<br>(114.77-128.62) | 85.41<br>(40.75-170.69)           | 190.79<br>(91.17-379.01)           | 123.39<br>(115.35-132.23) |
| Kuwait                              | 4803.24<br>(4239.96-5357.35)       | 27283.61<br>(23711.49-30552.98)    | 468.02<br>(442.77-492.71) | 44075.53<br>(39167.41-49291.28)       | 256931.13<br>(225941.61-287094.89)      | 482.93<br>(461.25-503.18) | 1529.23<br>(730.07-3069.46)       | 8875.19<br>(4216.79-17984.91)      | 480.37<br>(455.74-505.66) |
| Kyrgyzstan                          | 13633.64<br>(11891.22-15303.54)    | 28256.31<br>(24309.26-32132.68)    | 107.25<br>(99.94-115.49)  | 182459.46<br>(158195.50-208786.05)    | 347582.58<br>(298907.18-399945.42)      | 90.50<br>(85.02-97.34)    | 6396.76<br>(3090.37-12803.79)     | 12275.84<br>(5873.37-24608.89)     | 91.91<br>(85.22-99.46)    |
| Lao People's<br>Democratic Republic | 8442.30<br>(7402.99-9417.87)       | 23166.86<br>(20272.10-25800.72)    | 174.41<br>(164.05-186.83) | 94897.46<br>(84571.51-106999.75)      | 256116.12<br>(225951.68-284449.16)      | 169.89<br>(159.39-180.84) | 3222.47<br>(1550.70-6532.22)      | 8798.74<br>(4204.83-17778.08)      | 173.04<br>(161.05-186.52) |
| Latvia                              | 17577.14<br>(15584.46-19600.57)    | 17147.20<br>(15281.60-19092.01)    | -2.45<br>(-5.56-0.98)     | 251241.20<br>(221943.88-281862.97)    | 285051.22<br>(251601.01-319883.83)      | 13.46<br>(10.47-16.49)    | 8833.66<br>(4204.52-17933.79)     | 10204.96<br>(4910.59-20813.73)     | 15.52<br>(11.94-19.38)    |
| Lebanon                             | 10501.69<br>(9259.15-11791.71)     | 29680.77<br>(26182.25-32856.27)    | 182.63<br>(172.77-192.39) | 125297.98<br>(110889.87-140499.66)    | 386963.44<br>(345476.98-427385.05)      | 208.83<br>(199.25-218.78) | 4298.07<br>(2050.71-8673.36)      | 13309.11<br>(6394.88-26581.43)     | 209.65<br>(199.23-222.41) |
| Lesotho                             | 4036.43<br>(3571.16-4497.67)       | 6345.26<br>(5632.66-7046.41)       | 57.20<br>(51.39-62.82)    | 46613.76<br>(41366.31-52080.47)       | 71755.68<br>(63483.90-79522.46)         | 53.94<br>(48.53-59.40)    | 1603.29<br>(774.79-3193.90)       | 2454.86<br>(1172.19-4980.74)       | 53.11<br>(46.74-59.15)    |
| Liberia                             | 5475.55<br>(4876.03-6106.23)       | 14829.84<br>(13025.39-16591.72)    | 170.84<br>(158.37-183.61) | 62346.51<br>(55424.33-69475.24)       | 144111.87<br>(128548.62-160569.46)      | 131.15<br>(122.21-140.41) | 2099.93<br>(1008.99-4193.81)      | 4885.42<br>(2358.73-9921.85)       | 132.65<br>(122.45-142.59) |
| Libya                               | 10069.64<br>(8831.64-11224.24)     | 35916.30<br>(31462.32-40045.09)    | 256.68<br>(244.38-269.14) | 114661.77<br>(101657.63-126779.74)    | 381938.86<br>(337903.69-424560.33)      | 233.10<br>(223.48-243.77) | 3966.63<br>(1873.49-8054.90)      | 13140.63<br>(6298.46-26535.06)     | 231.28<br>(220.12-242.93) |
| Lithuania                           | 22206.94<br>(19615.64-24958.49)    | 24886.23<br>(21924.02-27897.06)    | 12.07<br>(8.44-15.70)     | 312085.66<br>(274934.46-351694.31)    | 412409.86<br>(363536.30-464231.18)      | 32.15<br>(28.34-36.08)    | 10970.20<br>(5259.83-22184.35)    | 14729.69<br>(7077.75-30377.17)     | 34.27<br>(30.12-38.97)    |
| Luxembourg                          | 2603.67<br>(2328.11-2913.47)       | 5250.30<br>(4678.89-5850.11)       | 101.65<br>(96.09-108.16)  | 35959.31<br>(32429.80-39645.32)       | 72050.81<br>(64856.85-79546.68)         | 100.37<br>(95.38-105.95)  | 1277.16<br>(619.58-2581.01)       | 2575.73<br>(1255.54-5199.88)       | 101.68<br>(95.14-107.78)  |
| Madagascar                          | 22700.59<br>(19850.57-25437.82)    | 62379.53<br>(54683.44-69430.13)    | 174.79<br>(164.84-186.21) | 246450.19<br>(218907.37-275234.82)    | 618495.67<br>(547973.12-692259.24)      | 150.96<br>(142.58-160.22) | 8359.98<br>(4039.87-16918.07)     | 21115.81<br>(10250.18-42216.18)    | 152.58<br>(141.81-162.51) |
| Malawi                              | 18371.91<br>(16138.62-20422.28)    | 41598.86<br>(36586.74-46465.90)    | 126.43<br>(118.89-134.63) | 196013.78<br>(174247.72-220147.51)    | 430596.20<br>(381850.83-480035.16)      | 119.68<br>(112.62-126.71) | 6653.06<br>(3212.43-13377.23)     | 14742.49<br>(7111.09-29707.08)     | 121.59<br>(113.48-130.10) |
| Malaysia                            | 46814.10<br>(41143.95-52105.40)    | 149066.36<br>(130991.97-165936.76) | 218.42<br>(207.53-230.67) | 525256.35<br>(464559.50-582937.29)    | 1844480.99<br>(1623467.15-2046052.29)   | 251.16<br>(239.90-262.89) | 18052.20<br>(8536.87-36195.92)    | 64150.46<br>(30558.32-130650.94)   | 255.36<br>(241.63-268.96) |
| Maldives                            | 442.55<br>(384.45-497.09)          | 2284.88<br>(1997.12-2541.56)       | 416.30<br>(393.40-441.71) | 4977.03<br>(4373.61-5600.38)          | 23523.03<br>(20543.55-26422.98)         | 372.63<br>(354.72-389.97) | 171.52<br>(81.65-346.87)          | 820.87<br>(388.85-1648.84)         | 378.58<br>(357.88-398.51) |
| Mali                                | 18969.55<br>(16611.99-21293.85)    | 48917.47<br>(42975.14-54786.19)    | 157.87<br>(147.82-166.12) | 205635.09<br>(180947.42-232196.94)    | 518280.50<br>(460243.85-576197.95)      | 152.04<br>(142.22-160.14) | 6952.47<br>(3320.62-14004.14)     | 17679.07<br>(8525.66-35194.22)     | 154.28<br>(143.31-166.17) |
| Malta                               | 2205.31<br>(1957.06-2451.21)       | 3974.10<br>(3570.22-4417.06)       | 80.21<br>(72.71-88.09)    | 28417.91<br>(25361.57-31464.91)       | 61872.52<br>(55817.38-68505.28)         | 117.72<br>(111.26-124.80) | 1011.24<br>(492.25-2019.69)       | 2226.73<br>(1083.36-4473.32)       | 120.20<br>(112.79-128.46) |
| Marshall Islands                    | 96.74<br>(85.36-106.98)            | 254.01<br>(222.26-283.91)          | 162.56<br>(151.37-172.16) | 1052.53<br>(930.58-1170.40)           | 2734.54<br>(2405.68-3060.88)            | 159.80<br>(151.94-167.69) | 36.41<br>(17.29-73.31)            | 94.57(44.64-190.85)                | 159.74<br>(150.52-169.63) |
| Mauritania                          | 4902.59<br>(4314.66-5482.70)       | 12721.50<br>(11193.83-14180.53)    | 159.49<br>(152.25-168.48) | 55960.72<br>(49822.40-62499.76)       | 142473.72<br>(126133.12-157303.37)      | 154.60<br>(147.60-163.03) | 1920.88<br>(932.12-3910.42)       | 4959.34<br>(2362.72-10023.13)      | 158.18<br>(149.04-167.60) |
| Mauritius                           | 3553.81<br>(3136.85-3951.78)       | 8641.30<br>(7560.43-9666.42)       | 143.16<br>(132.23-153.17) | 41941.83<br>(36871.79-46837.37)       | 120219.34<br>(105220.27-134579.30)      | 186.63<br>(177.27-194.94) | 1444.84<br>(684.57-2922.64)       | 4163.99<br>(1992.20-8329.16)       | 188.20<br>(176.75-198.04) |
| Mexico                              | 271007.03<br>(239139.82-301174.48) | 845738.53<br>(741869.99-936364.25) | 212.07<br>(206.23-217.58) | 3019238.13<br>(2680552.58-3343444.48) | 10208236.96<br>(9013451.69-11312756.72) | 238.11<br>(232.79-243.41) | 104802.83<br>(50161.79-212108.24) | 360985.49<br>(172240.82-727106.19) | 244.44<br>(237.98-250.84) |
| Micronesia<br>(Federated States of) | 266.95<br>(236.53-296.26)          | 499.60<br>(434.91-559.80)          | 87.15<br>(78.98-94.73)    | 3093.93<br>(2748.92-3428.92)          | 5779.57<br>(5072.55-6444.79)            | 86.80<br>(80.71-93.41)    | 107.03<br>(50.78-214.09)          | 201.32<br>(96.39-401.46)           | 88.10<br>(81.08-96.23)    |

|                          |                                    |                                    |                           |                                       |                                       |                           |                                  |                                    |                           |
|--------------------------|------------------------------------|------------------------------------|---------------------------|---------------------------------------|---------------------------------------|---------------------------|----------------------------------|------------------------------------|---------------------------|
| Monaco                   | 274.62<br>(246.27-306.83)          | 391.11<br>(349.54-437.03)          | 42.42<br>(38.63-47.07)    | 4351.72<br>(3921.96-4804.52)          | 6228.23<br>(5607.05-6869.27)          | 43.12<br>(39.50-46.74)    | 156.95<br>(75.43-319.92)         | 225.05<br>(108.80-450.99)          | 43.39<br>(38.90-48.00)    |
| Mongolia                 | 4849.16<br>(4251.14-5444.52)       | 15754.25<br>(13472.49-18098.73)    | 224.89<br>(210.42-240.83) | 60106.12<br>(52373.38-68053.96)       | 183223.00<br>(157823.06-212343.29)    | 204.83<br>(190.37-219.90) | 2094.75<br>(1000.87-4190.42)     | 6452.60<br>(3066.68-13168.92)      | 208.04<br>(192.30-224.88) |
| Montenegro               | 3187.67<br>(2803.09-3554.85)       | 4653.46<br>(4083.11-5215.08)       | 45.98<br>(40.69-51.02)    | 41463.57<br>(36197.10-46588.69)       | 67345.04<br>(59160.38-75352.44)       | 62.42<br>(57.72-67.21)    | 1460.24<br>(699.99-2946.32)      | 2383.02<br>(1146.27-4867.88)       | 63.19<br>(57.47-68.92)    |
| Morocco                  | 68064.12<br>(60211.80-76074.19)    | 180998.03<br>(159986.89-202804.35) | 165.92<br>(156.87-176.04) | 795767.21<br>(706124.42-884295.97)    | 2171352.04<br>(1923170.17-2402600.66) | 172.86<br>(164.82-181.88) | 27325.43<br>(13115.79-55791.70)  | 74163.92<br>(35516.30-151542.03)   | 171.41<br>(162.34-182.81) |
| Mozambique               | 28521.44<br>(25086.65-31791.52)    | 62053.04<br>(54601.24-69190.88)    | 117.57<br>(109.43-125.67) | 302314.65<br>(266627.31-338109.88)    | 638138.13<br>(563557.68-713789.51)    | 111.08<br>(103.36-118.04) | 10166.69<br>(4848.95-20528.77)   | 21568.69<br>(10342.31-43534.45)    | 112.15<br>(103.44-120.83) |
| Myanmar                  | 94100.31<br>(83053.46-104575.74)   | 233234.37<br>(205139.10-260510.89) | 147.86<br>(137.34-157.87) | 1077954.41<br>(954126.96-1205274.71)  | 2815942.99<br>(2485900.57-3143670.43) | 161.23<br>(150.68-171.18) | 36582.99<br>(17525.52-74377.90)  | 96779.11<br>(46237.61-192236.94)   | 164.55<br>(152.23-175.85) |
| Namibia                  | 3250.46<br>(2855.14-3639.44)       | 8343.57<br>(7333.97-9309.93)       | 156.69<br>(147.32-165.53) | 36282.00<br>(32170.08-40576.45)       | 91168.76<br>(81462.02-101415.01)      | 151.28<br>(142.87-159.19) | 1251.09<br>(609.87-2523.89)      | 3149.25<br>(1497.08-6318.67)       | 151.72<br>(141.38-161.43) |
| Nauru                    | 30.51<br>(26.65-34.04)             | 42.40<br>(37.22-47.33)             | 38.99<br>(33.95-45.13)    | 318.47<br>(282.71-355.55)             | 457.91<br>(405.26-513.28)             | 43.79<br>(39.33-49.21)    | 11.06<br>(5.26-22.08)            | 15.92<br>(7.60-31.64)              | 43.96<br>(38.27-50.39)    |
| Nepal                    | 44228.63<br>(39302.50-49166.64)    | 115211.17<br>(102658.20-128001.50) | 160.49<br>(151.56-170.05) | 477016.06<br>(423058.26-531853.49)    | 1354754.22<br>(1202295.88-1508078.41) | 184.01<br>(174.92-193.30) | 15938.63<br>(7779.87-32320.51)   | 45782.02<br>(22135.94-92351.74)    | 187.24<br>(176.24-199.29) |
| Netherlands              | 97291.47<br>(87433.12-107937.62)   | 154895.17<br>(137844.91-173273.19) | 59.21<br>(51.57-66.37)    | 1351065.82<br>(1239207.08-1478700.98) | 2323332.19<br>(2095824.25-2566694.80) | 71.96<br>(64.62-79.46)    | 48435.51<br>(23580.36-97160.91)  | 83317.18<br>(40222.11-169267.26)   | 72.02<br>(63.36-81.34)    |
| New Zealand              | 20650.68<br>(18415.42-22849.17)    | 44371.59<br>(39437.71-49394.72)    | 114.87<br>(109.14-121.37) | 275881.74<br>(247471.52-305446.77)    | 627576.84<br>(562573.67-693133.76)    | 127.48<br>(122.18-133.08) | 9758.67<br>(4729.71-19669.07)    | 22600.28<br>(10845.75-45607.20)    | 131.59<br>(125.62-138.66) |
| Nicaragua                | 8667.75<br>(7627.60-9609.35)       | 30198.12<br>(26577.04-33715.71)    | 248.40<br>(237.31-261.52) | 95091.97<br>(84560.40-105551.04)      | 348503.36<br>(308821.41-386203.33)    | 266.49<br>(256.07-279.38) | 3277.05<br>(1582.84-6601.62)     | 12087.17<br>(5854.33-24321.79)     | 268.84<br>(256.14-282.76) |
| Niger                    | 14143.62<br>(12458.62-15854.20)    | 43201.64<br>(38133.16-48220.56)    | 205.45<br>(195.20-217.65) | 143841.00<br>(127677.95-160715.60)    | 454880.92<br>(401577.73-510376.47)    | 216.24<br>(206.26-227.87) | 4875.55<br>(2377.20-9773.40)     | 15513.57<br>(7468.38-31212.23)     | 218.19<br>(205.26-231.37) |
| Nigeria                  | 227291.16<br>(200073.97-254306.46) | 593768.16<br>(521287.00-662832.29) | 161.24<br>(156.44-165.97) | 2538174.06<br>(2252320.71-2836865.39) | 6171576.50<br>(5479715.56-6850080.01) | 143.15<br>(139.29-147.07) | 86775.39<br>(41754.81-174519.99) | 213565.72<br>(102289.81-428806.70) | 146.11<br>(141.84-150.32) |
| Niue                     | 10.74<br>(9.49-11.97)              | 12.34<br>(10.90-13.75)             | 14.96<br>(10.65-19.30)    | 146.90<br>(130.74-164.72)             | 168.54<br>(148.03-187.40)             | 14.73<br>(11.22-18.79)    | 5.12<br>(2.45-10.30)             | 5.91<br>(2.86-11.79)               | 15.34<br>(11.47-19.95)    |
| North Macedonia          | 9175.41<br>(8090.51-10209.20)      | 16079.71<br>(14210.58-18001.51)    | 75.25<br>(69.87-81.05)    | 113854.61<br>(100497.19-127263.64)    | 220221.20<br>(194054.80-247312.66)    | 93.42<br>(88.29-98.18)    | 3957.22<br>(1891.12-8022.74)     | 7720.21<br>(3729.91-15666.96)      | 95.09<br>(88.30-101.32)   |
| Northern Mariana Islands | 165.37<br>(145.23-185.03)          | 361.82<br>(314.37-409.81)          | 118.80<br>(104.16-136.00) | 1449.75<br>(1277.38-1629.58)          | 4360.66<br>(3861.99-4852.81)          | 200.79<br>(187.18-216.07) | 50.74<br>(24.28-102.84)          | 153.78<br>(72.67-307.87)           | 203.10<br>(188.24-221.32) |
| Norway                   | 28574.34<br>(25448.95-31541.83)    | 45754.69<br>(40756.00-51003.94)    | 60.13<br>(57.31-62.81)    | 426724.99<br>(382913.51-472687.54)    | 665457.98<br>(598229.62-735909.27)    | 55.95<br>(54.24-57.59)    | 15180.68<br>(7350.49-30580.07)   | 23939.19<br>(11585.31-48114.64)    | 57.70<br>(55.42-59.61)    |
| Oman                     | 4163.80<br>(3667.82-4635.66)       | 18373.47<br>(16230.35-20498.67)    | 341.27<br>(325.45-356.71) | 41160.90<br>(36553.33-46150.93)       | 166344.32<br>(148368.10-186292.88)    | 304.13<br>(291.21-317.43) | 1408.82<br>(676.59-2859.37)      | 5753.23<br>(2747.36-11540.36)      | 308.37<br>(292.54-325.41) |
| Pakistan                 | 249293.45<br>(218771.59-280263.07) | 710195.02<br>(618261.31-798895.91) | 184.88<br>(178.11-192.33) | 2854291.85<br>(2512824.79-3197228.70) | 7627598.23<br>(6679952.77-8492196.76) | 167.23<br>(161.43-173.69) | 96928.72<br>(46086.79-195297.34) | 261199.60<br>(124700.72-522198.52) | 169.48<br>(162.54-178.17) |
| Palau                    | 59.36<br>(52.31-65.82)             | 155.67<br>(135.54-175.92)          | 162.24<br>(150.10-174.65) | 684.56<br>(609.74-761.93)             | 1907.48<br>(1680.63-2138.60)          | 178.64<br>(169.63-188.22) | 23.89<br>(11.35-48.86)           | 66.63<br>(31.77-132.66)            | 178.91<br>(168.92-189.97) |
| Palestine                | 4112.41<br>(3617.44-4598.69)       | 15980.91<br>(14017.08-17900.93)    | 288.60<br>(274.67-304.90) | 47974.07<br>(42524.49-53957.46)       | 174021.23<br>(153510.79-193335.41)    | 262.74<br>(249.78-276.29) | 1643.55<br>(797.10-3289.82)      | 5968.35<br>(2849.38-12076.82)      | 263.14<br>(247.71-278.96) |
| Panama                   | 8020.19<br>(7082.41-8912.34)       | 24713.84<br>(21961.12-27430.65)    | 208.15<br>(197.58-218.29) | 93919.84<br>(83215.42-104408.50)      | 315880.70<br>(280593.22-347772.08)    | 236.33<br>(226.55-244.96) | 3269.32<br>(1561.63-6569.60)     | 11102.53<br>(5340.56-22255.18)     | 239.60<br>(227.28-251.43) |
| Papua New Guinea         | 9687.45<br>(8500.77-10874.23)      | 32236.46<br>(28233.33-36149.52)    | 232.77<br>(219.18-246.25) | 101622.67<br>(89857.07-113863.98)     | 328342.50<br>(290264.50-366544.41)    | 223.10<br>(210.25-234.47) | 3445.04<br>(1655.09-6904.44)     | 11205.47<br>(5416.85-22417.12)     | 225.26<br>(212.40-239.34) |

|                                  |                                      |                                       |                            |                                          |                                          |                            |                                     |                                     |                            |
|----------------------------------|--------------------------------------|---------------------------------------|----------------------------|------------------------------------------|------------------------------------------|----------------------------|-------------------------------------|-------------------------------------|----------------------------|
| Paraguay                         | 12880.63<br>(11366.87-14299.89)      | 35220.61<br>(31206.44-39088.60)       | 173.44<br>(164.76-182.73)  | 150830.49<br>(133482.46-166899.67)       | 420797.00<br>(371504.60-467033.14)       | 178.99<br>(171.62-186.97)  | 5275.53<br>(2519.57-10630.20)       | 14700.30<br>(6967.63-29805.12)      | 178.65<br>(169.23-188.16)  |
| Peru                             | 70517.17<br>(62193.27-78558.21)      | 205559.36<br>(180552.05-227854.12)    | 191.50<br>(181.13-200.96)  | 813102.61<br>(720158.97-903442.32)       | 2517755.09<br>(2228671.61-2782727.44)    | 209.65<br>(200.65-217.98)  | 28553.75<br>(13791.43-57638.06)     | 89320.44<br>(42787.35-180730.52)    | 212.82<br>(202.71-222.65)  |
| Philippines                      | 136804.55<br>(119814.54-152613.58)   | 419468.91<br>(366177.69-471535.90)    | 206.62<br>(201.44-211.53)  | 1518301.16<br>(1328784.72-1694013.52)    | 4905958.00<br>(4283100.35-5490220.80)    | 223.12<br>(218.94-227.42)  | 51853.01<br>(24542.09-104045.22)    | 169673.12<br>(80661.21-339752.86)   | 227.22<br>(222.33-232.95)  |
| Poland                           | 208141.04<br>(183527.77-232356.05)   | 328301.95<br>(290504.70-366346.01)    | 57.73<br>(54.74-60.98)     | 2760678.31<br>(2435920.37-3094921.33)    | 4892574.97<br>(4294492.74-5479011.74)    | 77.22<br>(74.73-79.90)     | 96022.36<br>(46325.16-193634.29)    | 173973.80<br>(84080.61-351958.02)   | 81.18<br>(78.28-84.07)     |
| Portugal                         | 64091.05<br>(57341.64-71476.21)      | 99153.66<br>(88674.31-109697.25)      | 54.71<br>(49.75-59.63)     | 879207.36<br>(785026.09-974590.00)       | 1531034.98<br>(1387657.91-1690288.92)    | 74.14<br>(69.47-78.59)     | 30963.47<br>(14989.00-62443.28)     | 54607.12<br>(26327.40-109973.50)    | 76.36<br>(70.77-82.23)     |
| Puerto Rico                      | 20663.80<br>(18419.37-23018.99)      | 32518.89<br>(29014.96-35959.46)       | 57.37<br>(51.32-63.28)     | 267146.76<br>(238537.30-295265.73)       | 512073.83<br>(458024.98-565681.30)       | 91.68<br>(85.85-97.74)     | 9504.52<br>(4541.60-19067.25)       | 18333.09<br>(8816.43-37052.57)      | 92.89<br>(85.83-100.01)    |
| Qatar                            | 1287.83<br>(1128.22-1448.67)         | 13822.30<br>(12031.47-15488.75)       | 973.30<br>(928.64-1023.88) | 10014.12<br>(8795.68-11369.36)           | 108211.42<br>(95937.41-122252.93)        | 980.59<br>(936.34-1027.55) | 345.83<br>(164.48-698.60)           | 3732.31<br>(1781.75-7558.47)        | 979.22<br>(923.78-1041.07) |
| Republic of Korea                | 243702.24<br>(215123.00-270409.48)   | 615471.97<br>(547205.31-688215.64)    | 152.55<br>(143.06-162.88)  | 2692411.38<br>(2400450.42-2973646.95)    | 8441324.38<br>(7578238.02-9289492.95)    | 213.52<br>(203.94-224.62)  | 96296.45<br>(46362.81-195129.91)    | 307676.79<br>(148214.59-623772.02)  | 219.51<br>(208.47-230.77)  |
| Republic of Moldova              | 21213.86<br>(18723.08-23577.43)      | 28864.06<br>(25566.45-32253.82)       | 36.06<br>(32.25-40.46)     | 273920.89<br>(241769.33-305215.09)       | 414221.66<br>(365281.13-462181.94)       | 51.22<br>(47.01-55.91)     | 9526.52<br>(4559.95-19320.81)       | 14657.60<br>(7021.23-29353.45)      | 53.86<br>(48.72-59.50)     |
| Romania                          | 125422.77<br>(110912.37-140299.44)   | 151599.31<br>(133962.17-168487.14)    | 20.87<br>(17.10-25.42)     | 1664333.33<br>(1465507.82-1861361.16)    | 2276904.19<br>(2014050.11-2545520.16)    | 36.81<br>(33.12-41.01)     | 57921.93<br>(27934.07-116376.07)    | 80579.54<br>(38213.16-163255.15)    | 39.12<br>(34.42-44.15)     |
| Russian Federation               | 1004302.62<br>(881009.94-1125128.18) | 1283831.31<br>(1130169.17-1446183.75) | 27.83<br>(25.66-30.34)     | 14229933.06<br>(12375792.60-16136118.40) | 18882624.58<br>(16518692.41-21233249.88) | 32.70<br>(30.03-35.13)     | 502936.73<br>(239783.88-1018932.61) | 673207.72<br>(324711.53-1363422.48) | 33.86<br>(31.30-36.71)     |
| Rwanda                           | 13013.08<br>(11506.58-14539.83)      | 33947.88<br>(29699.02-37790.72)       | 160.87<br>(151.46-170.59)  | 138831.39<br>(123262.68-155502.75)       | 354898.61<br>(313940.33-399397.96)       | 155.63<br>(146.71-162.84)  | 4711.85<br>(2267.34-9557.50)        | 12116.23<br>(5847.10-24410.12)      | 157.14<br>(146.18-166.98)  |
| Saint Kitts and Nevis            | 168.81<br>(149.56-186.78)            | 467.83<br>(410.28-523.06)             | 177.14<br>(161.67-191.70)  | 2440.56<br>(2170.39-2706.46)             | 5643.42<br>(4965.64-6285.03)             | 131.23<br>(122.00-140.32)  | 86.18<br>(41.12-173.38)             | 198.93<br>(94.48-400.84)            | 130.85<br>(121.03-140.44)  |
| Saint Lucia                      | 443.80<br>(395.10-492.27)            | 1384.94<br>(1220.62-1539.29)          | 212.07<br>(199.86-225.23)  | 5545.16<br>(4924.90-6182.49)             | 17764.36<br>(15747.46-19673.52)          | 220.36<br>(210.56-231.21)  | 192.59<br>(92.73-392.45)            | 622.82<br>(300.17-1257.51)          | 223.40<br>(212.24-235.46)  |
| Saint Vincent and the Grenadines | 348.13<br>(311.61-387.74)            | 798.14<br>(705.29-892.81)             | 129.27<br>(120.53-137.02)  | 4460.46<br>(3969.73-4938.32)             | 10319.11<br>(9104.70-11423.73)           | 131.35<br>(124.44-137.97)  | 155.81<br>(74.14-313.77)            | 361.31<br>(174.89-743.54)           | 131.89<br>(124.12-140.18)  |
| Samoa                            | 477.17<br>(419.44-532.85)            | 905.55<br>(795.80-1019.18)            | 89.77<br>(83.27-96.48)     | 5669.06<br>(5062.90-6305.32)             | 10896.83<br>(9617.00-12172.10)           | 92.22<br>(85.93-98.10)     | 196.53<br>(94.07-390.05)            | 379.73<br>(181.52-754.24)           | 93.22<br>(86.52-100.79)    |
| San Marino                       | 159.65<br>(142.43-178.00)            | 314.00<br>(280.47-351.39)             | 96.68<br>(90.95-102.72)    | 2272.43<br>(2046.73-2510.85)             | 4760.39<br>(4286.57-5293.62)             | 109.48<br>(104.37-114.13)  | 81.12<br>(39.67-162.95)             | 170.57<br>(82.73-345.03)            | 110.27<br>(104.48-116.24)  |
| Sao Tome and Principe            | 299.17<br>(264.02-335.07)            | 763.89<br>(668.78-851.29)             | 155.34<br>(144.02-167.53)  | 3683.85<br>(3245.27-4140.47)             | 8195.01<br>(7248.72-9176.89)             | 122.46<br>(113.49-131.28)  | 127.40<br>(61.30-262.05)            | 287.00<br>(137.57-579.95)           | 125.28<br>(115.67-135.31)  |
| Saudi Arabia                     | 35182.44<br>(30925.89-39296.34)      | 184905.73<br>(161454.22-206867.00)    | 425.56<br>(405.17-447.36)  | 358102.26<br>(317568.12-400082.29)       | 1669212.28<br>(1468855.45-1864087.27)    | 366.13<br>(348.09-385.57)  | 12217.23<br>(5871.01-24414.47)      | 57366.54<br>(27050.04-114815.17)    | 369.55<br>(348.03-393.15)  |
| Senegal                          | 16080.31<br>(14163.01-17955.18)      | 44160.78<br>(38545.73-49138.95)       | 174.63<br>(165.18-183.83)  | 178535.82<br>(158271.63-200005.13)       | 487696.08<br>(431955.89-543741.15)       | 173.16<br>(164.73-181.09)  | 6090.89<br>(2937.01-12334.38)       | 16773.28<br>(8031.28-33485.34)      | 175.38<br>(165.18-185.37)  |
| Serbia                           | 53619.46<br>(47007.88-60118.14)      | 68586.13<br>(60636.78-76247.57)       | 27.91<br>(22.49-32.89)     | 688243.42<br>(601329.22-772951.61)       | 1032459.01<br>(910056.15-1152671.49)     | 50.01<br>(45.33-55.03)     | 24007.24<br>(11468.56-48135.34)     | 36404.12<br>(17445.25-73708.35)     | 51.64<br>(46.34-57.67)     |
| Seychelles                       | 232.31<br>(205.62-258.46)            | 634.96<br>(551.71-712.61)             | 173.32<br>(162.27-185.31)  | 3101.34<br>(2740.11-3456.96)             | 8011.72<br>(7010.33-8933.87)             | 158.33<br>(149.38-167.44)  | 107.65<br>(51.17-214.87)            | 278.60<br>(132.98-559.59)           | 158.80<br>(147.84-170.25)  |
| Sierra Leone                     | 9246.96<br>(8198.20-10287.02)        | 21581.78<br>(18975.70-23937.05)       | 133.39<br>(123.66-142.29)  | 104473.55<br>(92952.49-117306.42)        | 228398.68<br>(202456.59-254358.92)       | 118.62<br>(110.83-126.66)  | 3537.73<br>(1709.10-7084.24)        | 7830.04<br>(3753.43-15712.36)       | 121.33<br>(112.40-130.68)  |
| Singapore                        | 18009.23<br>(15810.41-20088.41)      | 60586.55<br>(53459.98-67210.64)       | 236.42<br>(224.14-249.52)  | 198983.10<br>(176481.59-219345.47)       | 772440.20<br>(686704.35-849720.39)       | 288.19<br>(276.56-300.33)  | 7221.64<br>(3412.38-14317.95)       | 28430.14<br>(13694.28-56974.23)     | 293.68<br>(280.62-307.70)  |



|                               |                                    |                                    |                           |                                       |                                       |                           |                                   |                                    |                           |
|-------------------------------|------------------------------------|------------------------------------|---------------------------|---------------------------------------|---------------------------------------|---------------------------|-----------------------------------|------------------------------------|---------------------------|
| Slovakia                      | 28455.15<br>(25090.16-31773.66)    | 44551.07<br>(39163.91-49636.20)    | 56.57<br>(52.36-61.31)    | 391659.09<br>(342919.43-440887.94)    | 659576.96<br>(581867.78-740170.59)    | 68.41<br>(64.29-72.95)    | 13705.87<br>(6487.80-27895.00)    | 23394.74<br>(11270.21-47392.67)    | 70.69<br>(65.48-76.67)    |
| Slovenia                      | 11790.01<br>(10383.91-13186.03)    | 18194.62<br>(16122.93-20341.77)    | 54.32<br>(49.35-59.92)    | 162734.08<br>(142848.87-182921.73)    | 287180.50<br>(252520.00-321638.69)    | 76.47<br>(71.47-82.19)    | 5682.82<br>(2694.50-11430.93)     | 10172.71<br>(4917.64-20700.68)     | 79.01<br>(72.78-85.13)    |
| Solomon Islands               | 761.91<br>(666.37-855.14)          | 2344.49<br>(2039.23-2634.05)       | 207.71<br>(195.95-219.43) | 8226.55<br>(7301.90-9179.61)          | 24551.69<br>(21729.56-27515.86)       | 198.44<br>(188.35-209.19) | 282.87<br>(135.04-567.00)         | 848.82<br>(404.33-1696.17)         | 200.07<br>(187.20-212.59) |
| Somalia                       | 13590.69<br>(11943.50-15233.76)    | 35857.13<br>(31434.54-40006.35)    | 163.84<br>(153.40-172.64) | 126940.14<br>(112767.45-141973.34)    | 339051.60<br>(300120.42-377062.39)    | 167.10<br>(157.18-175.51) | 4309.51<br>(2104.87-8656.56)      | 11522.88<br>(5543.47-23309.90)     | 167.38<br>(155.66-177.81) |
| South Africa                  | 125033.34<br>(110149.67-139039.89) | 306661.87<br>(269896.02-340954.90) | 145.26<br>(142.05-148.42) | 1443349.54<br>(1271318.53-1603518.53) | 3566080.34<br>(3135481.25-3969604.47) | 147.07<br>(144.45-149.98) | 50501.82<br>(24157.90-101375.11)  | 124233.25<br>(59848.76-248721.69)  | 146.00<br>(142.50-149.81) |
| South Sudan                   | 11184.46<br>(9857.93-12478.83)     | 22010.08<br>(19217.40-24633.32)    | 96.79<br>(88.60-106.23)   | 124312.41<br>(110890.20-139114.36)    | 219211.11<br>(193939.53-245024.42)    | 76.34<br>(70.24-84.31)    | 4165.06<br>(2024.89-8314.49)      | 7379.15<br>(3595.24-14771.78)      | 77.17<br>(69.35-86.04)    |
| Spain                         | 247727.10<br>(219689.38-278141.53) | 420976.27<br>(376268.79-470250.03) | 69.94<br>(64.64-75.27)    | 3489572.39<br>(3139552.81-3872738.53) | 6279574.92<br>(5668450.51-6993098.45) | 79.95<br>(75.05-84.92)    | 123887.67<br>(59793.30-248851.82) | 224792.41<br>(108762.63-454455.69) | 81.45<br>(75.55-87.49)    |
| Sri Lanka                     | 48932.05<br>(42912.10-54503.09)    | 117977.47<br>(103434.96-131691.11) | 141.10<br>(129.13-151.89) | 552485.89<br>(488604.28-613795.84)    | 1575155.30<br>(1380242.47-1763543.12) | 185.10<br>(173.32-196.40) | 18854.04<br>(8981.17-38305.20)    | 54025.08<br>(25576.21-108718.84)   | 186.54<br>(173.30-198.59) |
| Sudan                         | 39608.54<br>(34928.25-44228.58)    | 114477.63<br>(100690.06-127670.73) | 189.02<br>(175.76-200.28) | 438043.32<br>(388820.35-493519.15)    | 1200374.40<br>(1063278.17-1331239.81) | 174.03<br>(163.54-183.75) | 14803.80<br>(7071.43-29773.48)    | 41062.32<br>(19773.84-82320.50)    | 177.38<br>(164.67-190.41) |
| Suriname                      | 1531.56<br>(1338.49-1705.69)       | 3896.00<br>(3417.28-4354.40)       | 154.38<br>(146.10-163.33) | 18172.65<br>(16038.43-20192.34)       | 48941.48<br>(43092.77-54493.92)       | 169.31<br>(161.99-176.73) | 639.83<br>(304.42-1303.95)        | 1719.06<br>(825.94-3439.02)        | 168.67<br>(159.66-178.26) |
| Sweden                        | 54140.08<br>(47891.60-60494.79)    | 77849.10<br>(68631.12-87509.92)    | 43.79<br>(39.95-48.13)    | 797704.83<br>(708550.50-892345.98)    | 1188697.73<br>(1047613.18-1329028.25) | 49.01<br>(45.46-52.97)    | 28113.81<br>(13222.87-57854.31)   | 42255.42<br>(20045.75-86461.02)    | 50.30<br>(46.01-55.44)    |
| Switzerland                   | 46178.84<br>(41057.31-51247.02)    | 76109.05<br>(67951.25-85016.38)    | 64.81<br>(60.25-69.53)    | 656863.76<br>(587681.65-726269.15)    | 1131233.23<br>(1021569.54-1251299.83) | 72.22<br>(68.68-76.52)    | 23207.91<br>(11273.75-46797.74)   | 40161.71<br>(19424.56-80499.55)    | 73.05<br>(68.71-78.28)    |
| Syrian Arab Republic          | 25783.58<br>(22778.63-28804.98)    | 75626.00<br>(65836.59-85154.65)    | 193.31<br>(182.20-204.14) | 287369.10<br>(254501.04-319697.49)    | 890644.41<br>(783272.90-991866.23)    | 209.93<br>(199.89-221.12) | 9839.91<br>(4763.46-19630.86)     | 30700.65<br>(14734.72-60901.80)    | 212.00<br>(199.96-225.60) |
| Taiwan<br>(Province of China) | 91954.12<br>(80996.16-102954.22)   | 223448.81<br>(197853.78-249985.94) | 143.00<br>(133.46-152.71) | 1104590.49<br>(973881.96-1230178.29)  | 3215060.50<br>(2855621.84-3595342.09) | 191.06<br>(180.03-200.99) | 38585.33<br>(18394.05-77245.94)   | 113637.80<br>(53956.35-229872.21)  | 194.51<br>(182.77-205.48) |
| Tajikistan                    | 11677.89<br>(10186.64-13142.76)    | 32556.00<br>(27991.38-36814.38)    | 178.78<br>(169.13-189.66) | 147684.49<br>(128100.46-167793.36)    | 370401.52<br>(318735.22-423393.26)    | 150.81<br>(142.97-160.05) | 5145.09<br>(2472.05-10394.73)     | 12933.01<br>(6153.48-25852.96)     | 151.37<br>(141.48-162.32) |
| Thailand                      | 165162.40<br>(144618.60-183600.46) | 484227.60<br>(425932.22-544644.62) | 193.18<br>(179.27-208.71) | 1843097.36<br>(1638257.86-2053298.15) | 6612397.30<br>(5856915.79-7391249.39) | 258.77<br>(243.45-274.24) | 62734.43<br>(30600.65-126180.47)  | 229188.05<br>(110605.94-460753.16) | 265.33<br>(248.22-283.83) |
| Timor-Leste                   | 1404.89<br>(1231.69-1580.46)       | 3682.14<br>(3243.76-4097.61)       | 162.09<br>(148.84-175.15) | 13763.05<br>(12197.27-15556.85)       | 45112.88<br>(39773.29-50300.77)       | 227.78<br>(211.13-243.45) | 465.96<br>(223.63-940.86)         | 1540.45<br>(732.52-3120.03)        | 230.59<br>(212.28-249.35) |
| Togo                          | 6576.50<br>(5782.57-7296.69)       | 24075.39<br>(21234.34-26922.44)    | 266.08<br>(252.15-282.26) | 67670.76<br>(60129.75-75120.40)       | 247407.54<br>(218789.11-274359.39)    | 265.60<br>(253.27-279.24) | 2304.32<br>(1109.67-4594.26)      | 8532.45<br>(4036.24-17272.44)      | 270.28<br>(255.43-287.29) |
| Tokelau                       | 6.10<br>(5.37-6.80)                | 8.04<br>(7.09-8.91)                | 31.72<br>(26.77-36.80)    | 82.32<br>(72.55-91.93)                | 108.22<br>(96.19-120.06)              | 31.47<br>(27.20-35.66)    | 2.85<br>(1.38-5.75)               | 3.78<br>(1.82-7.63)                | 32.42<br>(27.66-37.59)    |
| Tonga                         | 302.82<br>(264.80-338.43)          | 469.41<br>(411.80-523.53)          | 55.01<br>(49.39-61.72)    | 3637.25<br>(3214.20-4040.66)          | 5826.86<br>(5172.23-6501.42)          | 60.20<br>(54.26-66.45)    | 126.33<br>(60.36-253.93)          | 203.08<br>(97.57-407.99)           | 60.75<br>(54.68-67.63)    |
| Trinidad and Tobago           | 4879.54<br>(4312.09-5457.58)       | 10980.43<br>(9706.65-12243.36)     | 125.03<br>(116.98-133.51) | 58782.23<br>(52329.44-65064.47)       | 145745.99<br>(129485.65-161267.12)    | 147.94<br>(140.87-154.94) | 2063.41<br>(981.40-4166.60)       | 5133.24<br>(2478.02-10560.20)      | 148.77<br>(140.58-157.57) |
| Tunisia                       | 23828.30<br>(21005.64-26755.88)    | 69720.70<br>(61709.51-77559.69)    | 192.60<br>(183.05-201.60) | 281097.11<br>(247994.98-314359.38)    | 874118.18<br>(773391.35-972641.97)    | 210.97<br>(200.70-219.91) | 9675.15<br>(4593.69-19642.87)     | 30167.23<br>(14549.09-61097.78)    | 211.80<br>(200.33-223.75) |
| Turkmenistan                  | 9069.78<br>(7961.31-10234.85)      | 24003.35<br>(20721.06-27399.20)    | 190.02<br>(179.99-199.97) | 112657.2<br>(197731.31-128117.03)     | 297030.64<br>(255487.29-341108.94)    | 220.77<br>(209.91-231.69) | 3945.73<br>(1888.90-7987.89)      | 10538.16<br>(4990.58-20938.36)     | 224.68<br>(211.84-237.30) |
| Tuvalu                        | 35.95<br>(31.51-40.14)             | 60.96<br>(53.46-68.28)             | 164.65<br>(154.74-174.86) | 426.99<br>(378.06-476.47)             | 768.14<br>(676.67-861.37)             | 163.66<br>(154.50-173.16) | 14.80<br>(7.05-30.14)             | 26.89<br>(12.73-54.97)             | 167.08<br>(156.11-178.95) |

|                                    |                                       |                                       |                              |                                          |                                          |                              |                                     |                                      |                              |
|------------------------------------|---------------------------------------|---------------------------------------|------------------------------|------------------------------------------|------------------------------------------|------------------------------|-------------------------------------|--------------------------------------|------------------------------|
| Türkiye                            | 172034.55<br>(151349.54-191269.98)    | 498940.01<br>(442251.12-557033.39)    | 69.56<br>(64.11-75.32)       | 1953405.25<br>(1735773.55-2176900.05)    | 6265937.25<br>(5560635.54-6937782.92)    | 79.90<br>(74.17-85.74)       | 67006.79<br>(32365.54-134315.34)    | 217554.77<br>(104524.79-438712.79)   | 81.67<br>(74.08-88.33)       |
| Uganda                             | 29417.51<br>(25827.76-32999.61)       | 82029.48<br>(72113.17-91565.95)       | 178.85<br>(169.01-189.07)    | 319755.63<br>(282997.68-358252.92)       | 846302.42<br>(748399.72-943276.88)       | 164.67<br>(156.20-173.89)    | 10808.16<br>(5230.93-21752.40)      | 28900.96<br>(13959.74-58727.41)      | 167.40<br>(156.98-178.92)    |
| Ukraine                            | 356545.13<br>(312759.74-401589.88)    | 386110.14<br>(341240.92-431370.24)    | 8.29<br>(4.79-11.78)         | 4936819.25<br>(4325172.58-5555751.54)    | 5699623.83<br>(5010776.96-6405476.83)    | 15.45<br>(12.32-18.74)       | 173385.45<br>(84207.03-350221.67)   | 202302.15<br>(97312.40-406819.99)    | 16.68<br>(12.84-20.50)       |
| United Arab Emirates               | 4548.70<br>(3970.18-5115.42)          | 63707.74<br>(55393.97-72162.23)       | 1300.57<br>(1235.14-1367.01) | 35269.13<br>(30792.82-40075.35)          | 503960.12<br>(441962.32-572572.31)       | 1328.90<br>(1279.20-1386.76) | 1210.94<br>(573.69-2457.77)         | 17355.80<br>(8125.42-34938.74)       | 1333.25<br>(1269.76-1409.17) |
| United Kingdom                     | 416553.10<br>(371985.22-462864.40)    | 610070.33<br>(544797.67-679814.06)    | 46.46<br>(45.00-48.10)       | 6004365.47<br>(5411317.39-6647048.93)    | 8953548.47<br>(8063136.45-9891755.23)    | 49.12<br>(48.13-50.13)       | 215272.50<br>(104015.22-432200.57)  | 322643.41<br>(156642.45-645022.18)   | 49.88<br>(48.75-51.22)       |
| United Republic of Tanzania        | 53271.94<br>(46769.39-59336.83)       | 145866.52<br>(129292.07-162102.24)    | 173.81<br>(165.16-183.46)    | 593225.19<br>(524534.28-660943.80)       | 1545396.50<br>(1374111.04-1718529.93)    | 160.51<br>(152.90-168.67)    | 20257.16<br>(9681.26-40379.52)      | 53090.81<br>(25271.55-107594.85)     | 162.08<br>(153.93-172.21)    |
| United States of America           | 1770581.66<br>(1582305.58-1951370.12) | 3192701.53<br>(2830531.82-3554075.01) | 80.32<br>(76.28-84.38)       | 25007735.07<br>(22549194.96-27580854.86) | 47581100.89<br>(42638857.15-52684415.20) | 90.27<br>(88.59-91.99)       | 900534.50<br>(432395.48-1819200.41) | 1710760.12<br>(829259.16-3463603.19) | 89.97<br>(87.94-92.55)       |
| United States Virgin Islands       | 579.91<br>(510.16-647.66)             | 889.40<br>(784.36-995.15)             | 53.37<br>(44.06-63.39)       | 6535.50<br>(5788.18-7239.81)             | 13567.14<br>(12092.65-14990.09)          | 107.59<br>(98.62-116.16)     | 231.07<br>(110.26-463.72)           | 483.12<br>(234.06-963.15)            | 109.08<br>(99.28-118.70)     |
| Uruguay                            | 19163.75<br>(17021.81-21377.55)       | 26842.26<br>(23942.06-29965.55)       | 40.07<br>(35.52-44.22)       | 266618.11<br>(236979.95-296555.43)       | 392380.61<br>(354172.81-436252.38)       | 47.17<br>(42.91-51.02)       | 9484.71<br>(4532.01-18884.85)       | 14039.33<br>(6794.96-27922.33)       | 48.02<br>(43.39-53.23)       |
| Uzbekistan                         | 53136.92<br>(46259.39-59857.27)       | 159659.3<br>(137465.65-180474.79)     | 200.47<br>(190.01-211.13)    | 691164.84<br>(600001.03-784589.83)       | 1921520.82<br>(1657298.21-2197996.32)    | 178.01<br>(168.83-186.88)    | 24208.24<br>(11686.02-48890.35)     | 67713.83<br>(32353.59-135488.50)     | 179.71<br>(169.26-190.17)    |
| Vanuatu                            | 343.15<br>(299.16-381.29)             | 1056.32<br>(930.56-1190.22)           | 207.83<br>(197.39-219.03)    | 3586.88<br>(3152.36-3991.89)             | 11429.51<br>(10100.44-12778.89)          | 218.65<br>(208.66-229.30)    | 122.57<br>(59.64-248.52)            | 392.31<br>(190.30-791.27)            | 220.06<br>(209.04-232.36)    |
| Venezuela (Bolivarian Republic of) | 59833.32<br>(53027.77-66428.49)       | 180660.39<br>(159653.17-201258.61)    | 201.94<br>(191.13-212.22)    | 669767.47<br>(597380.95-742736.58)       | 2255788.02<br>(1984530.74-2494580.22)    | 236.80<br>(227.43-247.01)    | 23413.93<br>(11252.96-46677.34)     | 79429.29<br>(38221.46-160696.88)     | 239.24<br>(227.47-251.71)    |
| Viet Nam                           | 145579.11<br>(128053.35-162687.98)    | 448882.04<br>(391922.63-502050.10)    | 208.34<br>(194.63-221.30)    | 1779684.81<br>(1572372.51-1987537.22)    | 5415246.51<br>(4745047.23-6045659.66)    | 204.28<br>(191.72-217.02)    | 60615.15<br>(29204.81-120769.91)    | 187214.70<br>(89043.91-373119.41)    | 208.86<br>(194.03-224.80)    |
| Yemen                              | 21538.37<br>(18960.91-23990.46)       | 77884.98<br>(68746.92-86681.40)       | 261.61<br>(247.20-275.23)    | 227270.32<br>(201431.08-254487.85)       | 804925.40<br>(712722.05-894558.83)       | 254.17<br>(240.87-267.03)    | 7635.07<br>(3681.79-15593.27)       | 27348.24<br>(13108.70-55052.66)      | 258.19<br>(242.61-274.47)    |
| Zambia                             | 14991.90<br>(13119.26-16794.84)       | 42992.71<br>(37783.47-48108.27)       | 186.77<br>(176.34-197.10)    | 159770.29<br>(141651.09-177776.16)       | 429173.59<br>(380416.15-476903.19)       | 168.62<br>(160.87-177.32)    | 5468.47<br>(2599.24-11123.08)       | 14661.58<br>(7052.48-29519.94)       | 168.11<br>(158.38-178.98)    |
| Zimbabwe                           | 20556.84<br>(18220.64-22841.63)       | 39757.63<br>(34863.72-44366.30)       | 93.40<br>(86.57-100.04)      | 224498.10<br>(199246.66-250423.26)       | 409820.92<br>(362489.52-457873.97)       | 82.55<br>(76.69-88.27)       | 7714.41<br>(3733.54-15456.25)       | 13961.24<br>(6714.89-27908.04)       | 80.98<br>(74.02-88.78)       |

**Table S4. The ASRs and EAPCs of osteoarthritis among 204 countries and territories from 1990 to 2021.**

| Country             | ASIR (per 100,000 population) |                           |                     | ASPR (per 100,000 population) |                              |                     | ASDR (per 100,000 population) |                           |                     |
|---------------------|-------------------------------|---------------------------|---------------------|-------------------------------|------------------------------|---------------------|-------------------------------|---------------------------|---------------------|
|                     | 1990                          | 2021                      | EAPC<br>(95%CI)     | 1990                          | 2021                         | EAPC<br>(95%CI)     | 1990                          | 2021                      | EAPC<br>(95%CI)     |
|                     | Both (95%UI)                  | Both (95%UI)              |                     | Both (95%UI)                  | Both (95%UI)                 |                     | Both (95%UI)                  | Both (95%UI)              |                     |
| Afghanistan         | 369.68<br>(327.35-412.51)     | 409.68<br>(362.26-460.31) | 0.40<br>(0.36-0.44) | 4551.49<br>(4037.46-5103.92)  | 5109.54<br>(4529.06-5687.19) | 0.44<br>(0.40-0.49) | 151.94<br>(74.17-298.64)      | 168.72<br>(82.61-342.54)  | 0.42<br>(0.36-0.47) |
| Albania             | 394.35<br>(350.82-437.54)     | 450.79<br>(399.77-501.81) | 0.50<br>(0.48-0.53) | 5015.70<br>(4461.40-5552.49)  | 5802.12<br>(5134.05-6443.77) | 0.56<br>(0.53-0.58) | 172.72<br>(84.18-345.16)      | 202.48<br>(95.80-411.34)  | 0.62<br>(0.59-0.65) |
| Algeria             | 423.18<br>(375.95-471.98)     | 497.51<br>(436.82-552.44) | 0.54<br>(0.53-0.55) | 5358.53<br>(4741.54-5992.18)  | 6415.25<br>(5660.49-7119.58) | 0.59<br>(0.58-0.61) | 183.41<br>(87.54-373.15)      | 221.98<br>(107.75-449.66) | 0.63<br>(0.62-0.65) |
| American Samoa      | 547.33<br>(481.28-608.20)     | 592.89<br>(525.32-658.09) | 0.22<br>(0.16-0.27) | 7179.89<br>(6341.41-8017.68)  | 7748.26<br>(6881.09-8567.07) | 0.20<br>(0.14-0.25) | 251.69<br>(119.41-509.07)     | 270.12<br>(129.45-551.87) | 0.18<br>(0.12-0.24) |
| Andorra             | 511.64<br>(452.39-572.82)     | 551.87<br>(489.74-614.22) | 0.23<br>(0.21-0.26) | 6593.29<br>(5912.65-7304.55)  | 7051.36<br>(6341.99-7816.83) | 0.22<br>(0.20-0.24) | 233.96<br>(112.66-475.84)     | 251.11<br>(120.46-499.59) | 0.24<br>(0.21-0.26) |
| Angola              | 467.32<br>(411.19-518.94)     | 512.67<br>(451.42-570.53) | 0.31<br>(0.30-0.32) | 6140.72<br>(5390.56-6872.11)  | 6744.43<br>(5931.12-7515.87) | 0.31<br>(0.30-0.32) | 212.45<br>(101.54-425.96)     | 234.86<br>(113.65-474.44) | 0.35<br>(0.33-0.36) |
| Antigua and Barbuda | 539.12<br>(479.32-598.36)     | 578.69<br>(509.83-644.12) | 0.22<br>(0.21-0.23) | 6937.47<br>(6157.08-7659.58)  | 7428.77<br>(6608.40-8288.91) | 0.21<br>(0.20-0.22) | 245.09<br>(115.82-494.51)     | 261.86<br>(125.07-527.03) | 0.20<br>(0.19-0.22) |
| Argentina           | 541.77<br>(479.37-603.57)     | 594.76<br>(527.85-658.47) | 0.28<br>(0.25-0.31) | 7040.54<br>(6291.77-7820.67)  | 7662.06<br>(6875.74-8441.60) | 0.27<br>(0.24-0.29) | 249.80<br>(118.69-501.09)     | 273.79<br>(131.17-552.10) | 0.29<br>(0.26-0.32) |
| Armenia             | 417.83<br>(366.13-467.52)     | 498.36<br>(433.96-561.53) | 0.66<br>(0.62-0.70) | 5647.29<br>(4927.09-6375.58)  | 6877.82<br>(5958.90-7835.83) | 0.75<br>(0.70-0.80) | 196.82<br>(94.89-394.86)      | 243.48<br>(117.86-489.79) | 0.81<br>(0.76-0.87) |
| Australia           | 554.29<br>(492.60-615.90)     | 619.68<br>(549.23-687.01) | 0.34<br>(0.31-0.37) | 7193.32<br>(6457.14-7943.79)  | 7930.63<br>(7103.71-8774.54) | 0.31<br>(0.29-0.34) | 254.52<br>(122.89-514.01)     | 283.74<br>(140.00-579.91) | 0.34<br>(0.32-0.36) |
| Austria             | 512.67<br>(455.67-567.05)     | 547.99<br>(489.83-610.91) | 0.19<br>(0.18-0.20) | 6666.34<br>(5990.86-7355.99)  | 7020.47<br>(6338.21-7745.78) | 0.15<br>(0.15-0.16) | 235.44<br>(112.91-471.62)     | 250.18<br>(119.59-502.77) | 0.18<br>(0.17-0.19) |
| Azerbaijan          | 456.98<br>(400.36-514.64)     | 507.78<br>(443.37-571.04) | 0.42<br>(0.34-0.50) | 6391.43<br>(5543.13-7311.22)  | 7036.93<br>(6082.81-7974.31) | 0.40<br>(0.31-0.50) | 226.04<br>(108.16-455.57)     | 250.24<br>(121.34-498.42) | 0.43<br>(0.33-0.54) |
| Bahamas             | 560.02<br>(495.79-620.75)     | 593.64<br>(522.42-658.79) | 0.19<br>(0.18-0.21) | 7207.99<br>(6414.18-8012.83)  | 7623.76<br>(6709.03-8430.50) | 0.18<br>(0.16-0.20) | 256.28<br>(122.45-515.73)     | 270.48<br>(130.50-543.63) | 0.18<br>(0.16-0.20) |
| Bahrain             | 474.08<br>(417.34-525.61)     | 510.40<br>(450.11-570.18) | 0.23<br>(0.23-0.24) | 6245.17<br>(5519.86-6943.99)  | 6726.28<br>(5940.43-7469.32) | 0.23<br>(0.23-0.24) | 216.41<br>(103.00-444.87)     | 232.14<br>(111.32-470.08) | 0.22<br>(0.22-0.23) |
| Bangladesh          | 402.60<br>(355.11-449.36)     | 455.67<br>(405.41-506.44) | 0.44<br>(0.40-0.48) | 5088.75<br>(4524.31-5639.13)  | 5823.51<br>(5178.29-6468.16) | 0.47<br>(0.43-0.51) | 172.10<br>(82.68-347.31)      | 199.66<br>(96.24-406.20)  | 0.52<br>(0.47-0.56) |
| Barbados            | 555.94<br>(490.84-620.48)     | 595.24<br>(525.11-661.83) | 0.23<br>(0.21-0.25) | 7124.99<br>(6331.32-7932.76)  | 7638.19<br>(6759.38-8450.26) | 0.23<br>(0.21-0.25) | 252.98<br>(118.68-511.77)     | 271.00<br>(128.56-550.66) | 0.23<br>(0.21-0.26) |
| Belarus             | 507.03<br>(447.17-566.78)     | 564.41<br>(497.20-630.19) | 0.40<br>(0.38-0.41) | 6906.92<br>(6100.22-7764.96)  | 7779.43<br>(6836.89-8711.71) | 0.44<br>(0.42-0.46) | 243.01<br>(115.90-494.74)     | 276.64<br>(131.02-552.93) | 0.49<br>(0.47-0.52) |
| Belgium             | 512.44<br>(456.01-570.60)     | 547.40<br>(487.41-610.97) | 0.18<br>(0.16-0.20) | 6669.13<br>(5978.04-7364.22)  | 7020.14<br>(6333.51-7766.14) | 0.16<br>(0.14-0.17) | 235.88<br>(112.56-469.94)     | 249.12<br>(120.13-503.67) | 0.16<br>(0.15-0.17) |
| Belize              | 509.91<br>(450.86-565.06)     | 579.85<br>(515.88-644.57) | 0.39<br>(0.35-0.44) | 6432.33<br>(5709.35-7146.34)  | 7355.87<br>(6544.10-8170.19) | 0.40<br>(0.35-0.46) | 225.89<br>(109.24-451.93)     | 259.76<br>(124.56-531.99) | 0.42<br>(0.36-0.48) |
| Benin               | 427.31<br>(379.13-475.64)     | 492.73<br>(436.01-545.17) | 0.46<br>(0.44-0.48) | 5318.89<br>(4714.43-5935.71)  | 6253.80<br>(5563.65-6986.83) | 0.52<br>(0.50-0.54) | 180.26<br>(86.82-363.75)      | 216.43<br>(103.74-435.14) | 0.59<br>(0.57-0.61) |

|                                        |                           |                           |                     |                              |                              |                     |                           |                           |                     |
|----------------------------------------|---------------------------|---------------------------|---------------------|------------------------------|------------------------------|---------------------|---------------------------|---------------------------|---------------------|
| Bermuda                                | 584.28<br>(515.14-649.11) | 610.02<br>(538.06-674.79) | 0.14<br>(0.12-0.15) | 7528.63<br>(6700.86-8313.17) | 7848.67<br>(6950.21-8646.83) | 0.13<br>(0.12-0.14) | 269.51<br>(127.75-547.59) | 280.77<br>(134.04-577.67) | 0.13<br>(0.12-0.15) |
| Bhutan                                 | 409.45<br>(363.49-454.69) | 465.74<br>(411.24-516.82) | 0.43<br>(0.41-0.44) | 5197.25<br>(4635.95-5794.22) | 5962.90<br>(5303.80-6602.66) | 0.45<br>(0.44-0.47) | 176.72<br>(85.34-357.62)  | 205.30<br>(99.36-416.97)  | 0.50<br>(0.48-0.51) |
| Bolivia<br>(Plurinational State<br>of) | 491.71<br>(436.14-549.30) | 555.53<br>(491.78-616.88) | 0.40<br>(0.39-0.42) | 6196.19<br>(5522.68-6909.47) | 7051.95<br>(6265.19-7828.99) | 0.42<br>(0.40-0.44) | 214.72<br>(103.06-434.06) | 246.67<br>(118.88-499.94) | 0.46<br>(0.44-0.48) |
| Bosnia and<br>Herzegovina              | 425.94<br>(377.16-473.08) | 492.00<br>(431.49-548.58) | 0.53<br>(0.46-0.59) | 5527.35<br>(4885.85-6162.46) | 6533.06<br>(5777.64-7326.00) | 0.61<br>(0.54-0.69) | 190.82<br>(90.86-382.32)  | 228.09<br>(108.19-460.57) | 0.66<br>(0.58-0.75) |
| Botswana                               | 456.76<br>(405.55-509.55) | 535.62<br>(473.79-595.78) | 0.49<br>(0.47-0.51) | 5822.96<br>(5193.81-6519.56) | 6937.39<br>(6147.07-7710.58) | 0.54<br>(0.52-0.56) | 201.46<br>(96.17-406.88)  | 241.11<br>(116.35-485.70) | 0.56<br>(0.54-0.58) |
| Brazil                                 | 527.73<br>(467.49-585.46) | 589.96<br>(522.15-651.51) | 0.38<br>(0.37-0.39) | 6602.20<br>(5862.60-7306.99) | 7433.17<br>(6589.59-8250.70) | 0.40<br>(0.39-0.41) | 228.00<br>(109.00-459.80) | 260.23<br>(124.97-525.16) | 0.45<br>(0.44-0.47) |
| Brunei Darussalam                      | 638.10<br>(565.55-711.02) | 686.67<br>(609.40-759.01) | 0.23<br>(0.21-0.26) | 8218.40<br>(7341.18-9058.99) | 8815.59<br>(7892.91-9708.06) | 0.23<br>(0.22-0.25) | 295.71<br>(141.47-598.41) | 319.00<br>(152.75-642.40) | 0.26<br>(0.24-0.28) |
| Bulgaria                               | 482.22<br>(426.11-535.83) | 520.68<br>(461.73-577.32) | 0.25<br>(0.24-0.26) | 6386.36<br>(5607.17-7153.15) | 7016.96<br>(6194.42-7863.49) | 0.32<br>(0.30-0.33) | 223.82<br>(106.25-449.81) | 247.88<br>(119.89-500.07) | 0.36<br>(0.34-0.37) |
| Burkina Faso                           | 399.70<br>(353.47-447.89) | 434.60<br>(382.77-485.58) | 0.27<br>(0.26-0.27) | 4913.09<br>(4360.56-5506.06) | 5373.97<br>(4778.24-6014.43) | 0.28<br>(0.28-0.29) | 165.59<br>(80.14-334.84)  | 183.48<br>(89.33-369.00)  | 0.34<br>(0.33-0.34) |
| Burundi                                | 399.82<br>(353.20-444.94) | 408.81<br>(361.23-455.05) | 0.09<br>(0.07-0.10) | 4971.21<br>(4410.04-5556.21) | 5090.05<br>(4515.49-5674.70) | 0.09<br>(0.08-0.11) | 169.22<br>(82.51-338.55)  | 174.11<br>(84.35-350.30)  | 0.12<br>(0.11-0.14) |
| Cabo Verde                             | 431.97<br>(381.53-485.99) | 499.28<br>(442.48-558.22) | 0.49<br>(0.49-0.50) | 5361.85<br>(4732.88-6021.12) | 6384.63<br>(5666.94-7115.52) | 0.60<br>(0.59-0.61) | 184.22<br>(89.06-371.37)  | 222.28<br>(106.71-449.99) | 0.65<br>(0.64-0.66) |
| Cambodia                               | 349.23<br>(307.33-389.74) | 395.30<br>(350.24-440.74) | 0.44<br>(0.42-0.46) | 4390.22<br>(3900.72-4913.70) | 5073.17<br>(4526.94-5661.49) | 0.51<br>(0.49-0.53) | 147.32<br>(71.44-297.48)  | 172.45<br>(82.59-347.10)  | 0.56<br>(0.54-0.58) |
| Cameroon                               | 448.31<br>(396.44-501.41) | 497.96<br>(442.52-554.89) | 0.31<br>(0.29-0.33) | 5590.59<br>(4980.35-6247.19) | 6290.74<br>(5604.23-6947.52) | 0.35<br>(0.32-0.37) | 190.37<br>(92.14-383.34)  | 217.40<br>(105.19-439.99) | 0.40<br>(0.37-0.43) |
| Canada                                 | 416.01<br>(365.47-464.62) | 460.07<br>(405.52-513.81) | 0.21<br>(0.15-0.27) | 5726.13<br>(5028.54-6431.15) | 6228.33<br>(5509.32-6983.19) | 0.20<br>(0.16-0.24) | 200.58<br>(97.21-409.53)  | 219.12<br>(105.39-441.98) | 0.20<br>(0.16-0.25) |
| Central African<br>Republic            | 414.92<br>(365.64-461.84) | 429.06<br>(378.82-478.07) | 0.10<br>(0.09-0.10) | 5234.28<br>(4629.39-5830.79) | 5416.43<br>(4810.45-6077.85) | 0.09<br>(0.08-0.10) | 176.32<br>(84.74-356.63)  | 183.52<br>(89.17-370.77)  | 0.12<br>(0.11-0.13) |
| Chad                                   | 399.77<br>(352.55-447.53) | 420.66<br>(371.48-469.65) | 0.15<br>(0.14-0.16) | 4928.72<br>(4386.60-5501.04) | 5195.54<br>(4610.45-5833.55) | 0.15<br>(0.15-0.16) | 166.59<br>(80.97-337.15)  | 176.36<br>(85.79-356.03)  | 0.17<br>(0.16-0.18) |
| Chile                                  | 535.97<br>(476.19-595.99) | 599.63<br>(536.35-665.62) | 0.33<br>(0.30-0.36) | 6879.89<br>(6154.64-7626.43) | 7686.10<br>(6940.84-8490.80) | 0.34<br>(0.31-0.37) | 242.02<br>(116.91-492.11) | 273.01<br>(132.17-543.92) | 0.37<br>(0.34-0.41) |
| China                                  | 487.11<br>(428.13-543.75) | 554.61<br>(486.85-619.54) | 0.58<br>(0.51-0.66) | 6148.92<br>(5417.29-6855.85) | 7030.66<br>(6211.20-7831.69) | 0.61<br>(0.53-0.70) | 210.61<br>(101.91-423.86) | 244.79<br>(117.30-491.91) | 0.67<br>(0.58-0.76) |
| Colombia                               | 506.09<br>(447.92-565.04) | 565.49<br>(498.00-628.15) | 0.38<br>(0.37-0.39) | 6431.68<br>(5691.26-7130.27) | 7248.39<br>(6425.18-8035.66) | 0.41<br>(0.40-0.42) | 223.91<br>(106.60-450.01) | 255.85<br>(121.38-520.40) | 0.47<br>(0.45-0.48) |
| Comoros                                | 410.18<br>(362.05-460.02) | 453.26<br>(401.04-504.17) | 0.34<br>(0.33-0.36) | 5099.13<br>(4529.15-5712.76) | 5730.41<br>(5090.90-6425.52) | 0.40<br>(0.39-0.42) | 173.75<br>(83.81-351.33)  | 197.51<br>(95.79-401.89)  | 0.46<br>(0.43-0.48) |
| Congo                                  | 465.42<br>(408.90-518.48) | 507.02<br>(449.56-563.60) | 0.27<br>(0.25-0.29) | 6008.24<br>(5308.97-6688.82) | 6579.57<br>(5822.29-7269.41) | 0.28<br>(0.26-0.30) | 207.24<br>(99.02-419.17)  | 228.94<br>(108.50-462.26) | 0.31<br>(0.29-0.34) |
| Cook Islands                           | 524.97<br>(466.34-583.31) | 600.06<br>(530.08-669.97) | 0.40<br>(0.36-0.44) | 6847.30<br>(6086.24-7589.92) | 7820.68<br>(6948.49-8635.62) | 0.39<br>(0.35-0.44) | 239.21<br>(115.12-469.67) | 274.29<br>(131.43-553.03) | 0.41<br>(0.37-0.45) |
| Costa Rica                             | 515.07<br>(456.42-573.76) | 572.96<br>(507.23-639.61) | 0.35<br>(0.33-0.36) | 6530.05<br>(5782.33-7255.26) | 7319.23<br>(6495.11-8094.93) | 0.37<br>(0.35-0.38) | 228.10<br>(109.03-460.02) | 257.22<br>(124.02-519.16) | 0.39<br>(0.38-0.41) |
| Croatia                                | 475.78<br>(421.03-529.37) | 514.63<br>(454.92-573.20) | 0.31<br>(0.29-0.32) | 6364.06<br>(5617.23-7127.73) | 6889.04<br>(6077.98-7714.01) | 0.31<br>(0.29-0.33) | 222.49<br>(105.85-451.18) | 242.83<br>(116.19-490.50) | 0.35<br>(0.33-0.37) |

|                                       |                           |                           |                       |                              |                              |                       |                           |                           |                       |
|---------------------------------------|---------------------------|---------------------------|-----------------------|------------------------------|------------------------------|-----------------------|---------------------------|---------------------------|-----------------------|
| Cuba                                  | 511.30<br>(452.56-569.57) | 561.70<br>(497.53-626.00) | 0.33<br>(0.32-0.35)   | 6460.64<br>(5711.96-7181.60) | 7149.55<br>(6341.91-7924.77) | 0.35<br>(0.34-0.36)   | 226.65<br>(108.22-458.52) | 252.13<br>(119.70-508.83) | 0.38<br>(0.36-0.39)   |
| Cyprus                                | 489.24<br>(435.53-543.47) | 540.01<br>(480.84-598.39) | 0.31<br>(0.29-0.33)   | 6280.38<br>(5647.32-6960.81) | 6887.52<br>(6177.64-7614.12) | 0.31<br>(0.28-0.34)   | 220.50<br>(106.03-442.22) | 244.83<br>(118.54-489.74) | 0.35<br>(0.32-0.38)   |
| Czechia                               | 497.57<br>(437.85-559.98) | 530.32<br>(467.70-594.32) | 0.20<br>(0.19-0.22)   | 6729.07<br>(5936.28-7547.49) | 7158.00<br>(6278.52-8069.96) | 0.19<br>(0.17-0.21)   | 234.93<br>(113.65-476.23) | 252.38<br>(122.37-511.39) | 0.22<br>(0.20-0.24)   |
| Côte d'Ivoire                         | 430.14<br>(380.01-479.29) | 473.79<br>(419.28-528.18) | 0.29<br>(0.27-0.30)   | 5375.53<br>(4761.31-5987.44) | 5989.82<br>(5296.36-6648.85) | 0.32<br>(0.30-0.33)   | 180.99<br>(87.66-366.64)  | 206.55<br>(98.96-421.13)  | 0.39<br>(0.37-0.41)   |
| Democratic People's Republic of Korea | 472.99<br>(414.87-528.27) | 505.10<br>(444.93-562.60) | 0.23<br>(0.21-0.24)   | 6082.82<br>(5405.92-6773.87) | 6522.42<br>(5756.49-7259.56) | 0.23<br>(0.21-0.25)   | 209.30<br>(99.57-421.76)  | 226.01<br>(109.70-457.60) | 0.26<br>(0.24-0.28)   |
| Democratic Republic of the Congo      | 435.39<br>(383.37-484.02) | 442.97<br>(392.55-492.31) | -0.00<br>(-0.07-0.06) | 5495.06<br>(4869.45-6140.49) | 5630.43<br>(4986.72-6263.44) | 0.00<br>(-0.07-0.07)  | 186.03<br>(88.98-378.98)  | 192.57<br>(91.26-388.56)  | 0.04<br>(-0.05-0.12)  |
| Denmark                               | 542.83<br>(481.96-601.04) | 539.24<br>(479.51-598.50) | 0.02<br>(-0.01-0.05)  | 7157.23<br>(6383.36-7947.87) | 6913.85<br>(6189.62-7612.05) | -0.03<br>(-0.07-0.01) | 256.17<br>(125.23-525.24) | 246.85<br>(119.06-502.47) | -0.02<br>(-0.07-0.02) |
| Djibouti                              | 406.30<br>(358.06-454.02) | 475.16<br>(421.53-528.18) | 0.58<br>(0.54-0.62)   | 5098.63<br>(4541.04-5685.89) | 6078.33<br>(5360.14-6782.81) | 0.65<br>(0.61-0.70)   | 174.85<br>(84.17-352.08)  | 211.85<br>(101.25-426.85) | 0.72<br>(0.67-0.77)   |
| Dominica                              | 516.38<br>(456.62-573.82) | 560.33<br>(497.81-619.90) | 0.26<br>(0.24-0.28)   | 6535.93<br>(5798.18-7263.44) | 7159.03<br>(6343.23-7959.96) | 0.29<br>(0.26-0.32)   | 228.88<br>(109.84-461.68) | 251.66<br>(120.62-504.77) | 0.30<br>(0.27-0.34)   |
| Dominican Republic                    | 513.72<br>(455.30-568.88) | 569.34<br>(503.36-635.73) | 0.36<br>(0.34-0.37)   | 6527.81<br>(5770.04-7251.73) | 7275.90<br>(6455.96-8027.51) | 0.37<br>(0.36-0.38)   | 229.61<br>(108.88-460.32) | 256.67<br>(123.39-517.29) | 0.38<br>(0.37-0.40)   |
| Ecuador                               | 533.99<br>(474.80-593.78) | 590.72<br>(522.18-656.04) | 0.35<br>(0.34-0.37)   | 6764.78<br>(6025.12-7470.54) | 7519.98<br>(6667.34-8311.41) | 0.36<br>(0.34-0.37)   | 238.23<br>(113.46-473.99) | 266.02<br>(127.18-531.31) | 0.38<br>(0.36-0.40)   |
| Egypt                                 | 426.67<br>(376.10-479.06) | 485.92<br>(428.33-542.21) | 0.35<br>(0.31-0.38)   | 5381.83<br>(4766.07-5997.61) | 6181.47<br>(5514.48-6898.66) | 0.36<br>(0.33-0.40)   | 184.34<br>(88.76-376.30)  | 212.88<br>(102.71-441.12) | 0.38<br>(0.34-0.41)   |
| El Salvador                           | 506.49<br>(446.95-560.38) | 570.47<br>(505.56-631.65) | 0.40<br>(0.37-0.43)   | 6409.22<br>(5654.70-7112.05) | 7260.22<br>(6468.35-8001.84) | 0.42<br>(0.39-0.45)   | 222.83<br>(105.15-450.96) | 254.69<br>(121.81-512.17) | 0.45<br>(0.42-0.48)   |
| Equatorial Guinea                     | 404.63<br>(357.48-451.47) | 525.10<br>(463.69-583.57) | 1.02<br>(0.95-1.08)   | 5036.52<br>(4473.47-5638.07) | 6803.41<br>(6010.86-7551.62) | 1.16<br>(1.09-1.24)   | 168.70<br>(82.70-341.89)  | 236.45<br>(113.18-474.06) | 1.31<br>(1.23-1.40)   |
| Eritrea                               | 387.17<br>(342.83-433.15) | 424.42<br>(373.65-470.44) | 0.30<br>(0.29-0.31)   | 4815.44<br>(4277.17-5363.61) | 5346.09<br>(4733.62-5981.62) | 0.34<br>(0.33-0.36)   | 162.80<br>(77.37-326.36)  | 181.97<br>(87.13-363.62)  | 0.37<br>(0.36-0.38)   |
| Estonia                               | 526.34<br>(465.97-586.94) | 582.92<br>(509.57-651.05) | 0.35<br>(0.33-0.37)   | 7234.71<br>(6372.16-8155.57) | 8078.01<br>(7084.89-9172.98) | 0.37<br>(0.34-0.40)   | 255.17<br>(122.08-509.70) | 288.85<br>(137.70-578.21) | 0.43<br>(0.39-0.46)   |
| Eswatini                              | 468.62<br>(414.64-521.03) | 533.06<br>(470.10-591.84) | 0.37<br>(0.32-0.42)   | 5923.74<br>(5253.77-6600.06) | 6853.44<br>(6098.84-7609.43) | 0.43<br>(0.38-0.47)   | 205.20<br>(97.27-414.23)  | 236.74<br>(114.31-476.35) | 0.41<br>(0.36-0.47)   |
| Ethiopia                              | 416.45<br>(368.14-462.50) | 497.67<br>(438.54-554.72) | 0.66<br>(0.63-0.69)   | 5154.73<br>(4583.26-5784.53) | 6355.21<br>(5595.77-7115.11) | 0.78<br>(0.74-0.82)   | 174.24<br>(83.89-354.23)  | 221.13<br>(106.00-443.57) | 0.90<br>(0.86-0.94)   |
| Fiji                                  | 489.39<br>(434.75-547.82) | 561.84<br>(494.76-627.97) | 0.43<br>(0.39-0.46)   | 6324.64<br>(5621.26-7061.38) | 7350.01<br>(6534.68-8144.31) | 0.46<br>(0.42-0.50)   | 218.16<br>(103.81-436.67) | 255.44<br>(124.01-518.35) | 0.49<br>(0.45-0.53)   |
| Finland                               | 512.46<br>(456.36-570.22) | 549.98<br>(493.38-610.30) | 0.22<br>(0.20-0.24)   | 6653.50<br>(5991.12-7344.39) | 7049.95<br>(6353.47-7847.64) | 0.19<br>(0.17-0.21)   | 234.36<br>(113.87-474.56) | 250.40<br>(120.14-504.88) | 0.22<br>(0.20-0.23)   |
| France                                | 511.42<br>(453.51-571.99) | 547.52<br>(485.99-604.87) | 0.20<br>(0.17-0.23)   | 6642.77<br>(5964.33-7337.27) | 7026.03<br>(6328.47-7763.58) | 0.18<br>(0.15-0.21)   | 234.40<br>(112.98-472.93) | 249.80<br>(120.05-501.61) | 0.20<br>(0.17-0.23)   |
| Gabon                                 | 449.43<br>(394.82-501.74) | 521.52<br>(462.10-581.15) | 0.47<br>(0.45-0.48)   | 5726.79<br>(5087.22-6371.20) | 6715.95<br>(6006.05-7495.81) | 0.49<br>(0.47-0.51)   | 196.73<br>(94.44-402.34)  | 233.49<br>(111.49-471.87) | 0.53<br>(0.51-0.56)   |
| Gambia                                | 426.60<br>(376.61-478.64) | 491.19<br>(432.75-544.29) | 0.46<br>(0.45-0.47)   | 5354.08<br>(4758.28-5999.44) | 6266.31<br>(5546.61-6941.78) | 0.51<br>(0.50-0.53)   | 183.23<br>(88.19-367.49)  | 216.97<br>(104.66-440.43) | 0.55<br>(0.54-0.57)   |
| Georgia                               | 446.26<br>(394.53-501.00) | 479.34<br>(420.92-539.34) | 0.20<br>(0.15-0.25)   | 6085.05<br>(5310.80-6875.33) | 6585.18<br>(5732.69-7446.44) | 0.21<br>(0.14-0.28)   | 214.36<br>(103.98-429.72) | 231.67<br>(111.79-465.13) | 0.21<br>(0.13-0.28)   |

|                               |                           |                           |                        |                              |                              |                        |                           |                           |                        |
|-------------------------------|---------------------------|---------------------------|------------------------|------------------------------|------------------------------|------------------------|---------------------------|---------------------------|------------------------|
| Germany                       | 519.99<br>(464.38-575.95) | 553.67<br>(490.76-616.73) | 0.20<br>(0.15-0.25)    | 6788.09<br>(6108.46-7478.47) | 7101.48<br>(6375.14-7854.64) | 0.21<br>(0.14-0.28)    | 240.34<br>(116.58-486.29) | 252.42<br>(124.23-508.18) | 0.21<br>(0.13-0.28)    |
| Ghana                         | 483.22<br>(426.33-536.33) | 514.65<br>(452.38-573.11) | 0.15<br>(0.13-0.17)    | 6293.92<br>(5570.49-7038.64) | 6596.62<br>(5839.40-7323.09) | 0.11<br>(0.09-0.13)    | 219.37<br>(104.44-442.96) | 230.94<br>(110.66-463.47) | 0.11<br>(0.09-0.13)    |
| Greece                        | 493.03<br>(440.17-550.49) | 538.05<br>(478.80-598.85) | 0.24<br>(0.16-0.33)    | 6273.43<br>(5658.99-6962.72) | 6841.38<br>(6128.06-7558.30) | 0.21<br>(0.09-0.32)    | 220.27<br>(106.68-442.47) | 242.69<br>(117.51-488.87) | 0.23<br>(0.10-0.35)    |
| Greenland                     | 421.38<br>(372.78-472.42) | 471.16<br>(416.96-527.70) | 0.52<br>(0.41-0.63)    | 5758.74<br>(5072.46-6443.67) | 6311.89<br>(5577.44-7018.56) | 0.60<br>(0.47-0.74)    | 199.70<br>(96.66-407.62)  | 221.68<br>(106.58-445.91) | 0.70<br>(0.54-0.85)    |
| Grenada                       | 507.06<br>(448.94-563.76) | 559.45<br>(496.57-623.76) | 0.35<br>(0.33-0.37)    | 6439.74<br>(5694.45-7173.18) | 7182.67<br>(6385.46-7940.49) | 0.30<br>(0.28-0.32)    | 225.19<br>(108.01-454.13) | 252.03<br>(120.04-508.96) | 0.35<br>(0.32-0.38)    |
| Guam                          | 526.14<br>(459.96-585.54) | 585.14<br>(516.21-653.49) | 0.31<br>(0.28-0.33)    | 6899.48<br>(6103.13-7697.34) | 7662.81<br>(6785.00-8492.58) | 0.34<br>(0.31-0.38)    | 243.66<br>(117.19-490.61) | 272.57<br>(130.83-543.30) | 0.35<br>(0.31-0.39)    |
| Guatemala                     | 473.66<br>(418.41-526.38) | 526.84<br>(464.90-587.70) | 0.35<br>(0.32-0.37)    | 5948.62<br>(5272.25-6601.35) | 6651.75<br>(5895.61-7375.18) | 0.34<br>(0.32-0.37)    | 204.21<br>(97.43-411.01)  | 229.35<br>(110.64-468.92) | 0.37<br>(0.34-0.40)    |
| Guinea                        | 407.52<br>(360.24-458.15) | 441.35<br>(391.03-490.61) | 0.34<br>(0.33-0.35)    | 5023.77<br>(4471.81-5601.18) | 5472.85<br>(4862.60-6116.27) | 0.35<br>(0.34-0.36)    | 170.35<br>(82.60-346.01)  | 187.16<br>(90.56-375.05)  | 0.37<br>(0.36-0.37)    |
| Guinea-Bissau                 | 415.91<br>(366.18-466.96) | 449.91<br>(396.64-504.30) | 0.23<br>(0.22-0.25)    | 5149.53<br>(4564.94-5748.58) | 5632.25<br>(4996.83-6286.28) | 0.25<br>(0.24-0.26)    | 174.40<br>(85.58-351.70)  | 192.95<br>(92.62-388.98)  | 0.28<br>(0.27-0.29)    |
| Guyana                        | 502.74<br>(444.60-559.47) | 559.63<br>(492.67-621.86) | 0.23<br>(0.22-0.24)    | 6351.55<br>(5626.34-7059.22) | 7142.27<br>(6320.33-7924.32) | 0.27<br>(0.25-0.28)    | 218.60<br>(105.30-444.74) | 247.38<br>(118.93-502.57) | 0.30<br>(0.29-0.31)    |
| Haiti                         | 442.36<br>(391.72-492.75) | 482.72<br>(427.11-537.44) | 0.35<br>(0.33-0.37)    | 5470.04<br>(4873.16-6126.75) | 6017.15<br>(5337.40-6713.95) | 0.38<br>(0.36-0.40)    | 185.89<br>(90.75-375.68)  | 205.56<br>(99.61-414.73)  | 0.41<br>(0.38-0.43)    |
| Honduras                      | 483.21<br>(423.44-537.00) | 534.58<br>(472.02-594.80) | 0.31<br>(0.30-0.32)    | 6085.80<br>(5355.05-6786.11) | 6762.81<br>(5990.99-7500.81) | 0.34<br>(0.33-0.35)    | 210.73<br>(101.67-419.56) | 234.49<br>(113.62-471.52) | 0.36<br>(0.35-0.37)    |
| Hungary                       | 500.34<br>(443.39-557.91) | 534.71<br>(469.04-597.53) | 0.33<br>(0.33-0.34)    | 6709.10<br>(5925.46-7503.83) | 7214.44<br>(6368.95-8126.69) | 0.35<br>(0.34-0.35)    | 233.81<br>(112.60-473.37) | 255.43<br>(121.98-513.41) | 0.36<br>(0.35-0.37)    |
| Iceland                       | 549.74<br>(490.87-609.42) | 570.31<br>(509.81-631.84) | 0.19<br>(0.17-0.22)    | 7152.25<br>(6408.10-7939.30) | 7403.16<br>(6672.74-8204.43) | 0.21<br>(0.17-0.24)    | 257.13<br>(125.65-529.60) | 266.59<br>(129.22-534.84) | 0.26<br>(0.23-0.30)    |
| India                         | 438.57<br>(389.25-485.34) | 505.00<br>(445.85-559.19) | 0.08<br>(0.03-0.13)    | 5507.82<br>(4893.00-6104.55) | 6450.10<br>(5727.52-7137.44) | 0.11<br>(0.06-0.15)    | 185.04<br>(89.55-374.84)  | 221.21<br>(106.34-446.55) | 0.11<br>(0.05-0.16)    |
| Indonesia                     | 383.12<br>(337.78-426.13) | 446.32<br>(393.96-496.65) | 0.47<br>(0.45-0.50)    | 4870.66<br>(4310.22-5475.32) | 5753.51<br>(5067.26-6426.03) | 0.54<br>(0.51-0.57)    | 166.18<br>(79.41-335.23)  | 199.35<br>(95.36-399.40)  | 0.62<br>(0.59-0.64)    |
| Iran<br>(Islamic Republic of) | 431.91<br>(381.86-478.32) | 489.96<br>(433.93-541.89) | 0.51<br>(0.49-0.53)    | 5447.47<br>(4832.39-6098.90) | 6230.63<br>(5520.28-6928.61) | 0.54<br>(0.52-0.56)    | 186.61<br>(89.16-376.72)  | 215.06<br>(102.51-433.50) | 0.60<br>(0.57-0.62)    |
| Iraq                          | 448.04<br>(392.76-498.76) | 482.17<br>(424.64-537.96) | 0.42<br>(0.37-0.47)    | 5726.27<br>(5061.17-6360.22) | 6212.41<br>(5512.95-6899.99) | 0.45<br>(0.36-0.54)    | 196.15<br>(93.48-394.81)  | 211.66<br>(102.78-427.04) | 0.48<br>(0.39-0.58)    |
| Ireland                       | 509.37<br>(451.56-566.39) | 551.97<br>(492.92-614.47) | 0.21<br>(0.19-0.23)    | 6567.15<br>(5836.02-7276.77) | 7038.71<br>(6311.33-7817.10) | 0.22<br>(0.20-0.25)    | 232.12<br>(111.79-469.46) | 250.99<br>(121.51-505.28) | 0.21<br>(0.18-0.23)    |
| Israel                        | 514.10<br>(457.68-573.02) | 550.06<br>(491.20-613.26) | 0.23<br>(0.22-0.25)    | 6608.75<br>(5921.60-7309.56) | 7043.03<br>(6360.05-7771.73) | 0.22<br>(0.20-0.24)    | 234.39<br>(111.80-470.27) | 251.49<br>(119.76-507.17) | 0.24<br>(0.22-0.27)    |
| Italy                         | 528.28<br>(469.83-586.66) | 560.17<br>(498.16-622.36) | -0.19<br>(-0.37--0.02) | 6763.99<br>(6076.33-7492.00) | 7102.79<br>(6365.16-7858.68) | -0.25<br>(-0.44--0.05) | 238.92<br>(115.29-479.42) | 253.76<br>(122.37-511.53) | -0.30<br>(-0.53--0.08) |
| Jamaica                       | 512.63<br>(452.87-570.60) | 560.85<br>(496.04-622.78) | 0.24<br>(0.19-0.30)    | 6489.84<br>(5736.57-7193.44) | 7129.51<br>(6347.43-7865.33) | 0.24<br>(0.17-0.30)    | 228.40<br>(108.85-461.42) | 251.52<br>(120.26-507.66) | 0.29<br>(0.22-0.37)    |
| Japan                         | 633.39<br>(560.47-699.89) | 671.40<br>(594.22-740.18) | 0.31<br>(0.29-0.33)    | 7955.13<br>(7071.66-8796.20) | 8442.68<br>(7514.97-9306.51) | 0.32<br>(0.29-0.34)    | 287.04<br>(137.89-578.09) | 309.47<br>(147.61-625.16) | 0.33<br>(0.30-0.36)    |
| Jordan                        | 453.18<br>(403.15-504.64) | 512.39<br>(455.00-567.56) | 0.40<br>(0.22-0.57)    | 5845.34<br>(5186.40-6512.19) | 6661.01<br>(5930.75-7365.31) | 0.45<br>(0.23-0.67)    | 201.61<br>(97.21-405.82)  | 230.62<br>(110.63-463.10) | 0.56<br>(0.29-0.83)    |

|                                     |                           |                           |                     |                              |                              |                     |                           |                           |                     |
|-------------------------------------|---------------------------|---------------------------|---------------------|------------------------------|------------------------------|---------------------|---------------------------|---------------------------|---------------------|
| Kazakhstan                          | 468.31<br>(412.41-523.97) | 545.27<br>(477.21-610.87) | 0.41<br>(0.38-0.44) | 6534.70<br>(5661.37-7420.15) | 7753.16<br>(6780.81-8862.72) | 0.43<br>(0.40-0.46) | 229.68<br>(110.43-463.58) | 275.74<br>(132.53-557.97) | 0.45<br>(0.42-0.48) |
| Kenya                               | 447.59<br>(396.00-495.11) | 516.33<br>(457.17-572.70) | 0.52<br>(0.49-0.55) | 5591.60<br>(4952.58-6240.34) | 6578.32<br>(5819.56-7327.82) | 0.59<br>(0.55-0.63) | 192.09<br>(92.36-388.17)  | 229.67<br>(109.42-462.80) | 0.64<br>(0.59-0.68) |
| Kiribati                            | 499.13<br>(440.05-557.54) | 542.96<br>(480.76-604.78) | 0.48<br>(0.45-0.51) | 6504.82<br>(5779.53-7252.47) | 7072.38<br>(6288.68-7879.49) | 0.54<br>(0.51-0.57) | 223.76<br>(107.40-446.50) | 245.16<br>(117.39-491.33) | 0.61<br>(0.57-0.65) |
| Kuwait                              | 472.49<br>(421.41-526.80) | 530.97<br>(470.38-590.98) | 0.22<br>(0.17-0.26) | 6195.32<br>(5519.63-6877.85) | 6867.24<br>(6095.67-7617.16) | 0.20<br>(0.15-0.25) | 215.93<br>(102.79-440.53) | 238.38<br>(113.72-478.00) | 0.22<br>(0.17-0.28) |
| Kyrgyzstan                          | 441.31<br>(385.52-493.85) | 490.97<br>(425.08-552.09) | 0.43<br>(0.41-0.45) | 6139.58<br>(5334.58-7001.17) | 6870.46<br>(5921.52-7865.82) | 0.40<br>(0.38-0.42) | 215.42<br>(103.79-431.66) | 243.57<br>(116.39-488.63) | 0.39<br>(0.37-0.41) |
| Lao People's<br>Democratic Republic | 353.39<br>(312.05-393.84) | 402.53<br>(353.19-448.15) | 0.41<br>(0.35-0.47) | 4473.64<br>(3984.69-5028.53) | 5173.35<br>(4569.48-5731.86) | 0.46<br>(0.38-0.54) | 151.59<br>(72.58-306.98)  | 177.54<br>(84.62-358.28)  | 0.51<br>(0.42-0.59) |
| Latvia                              | 518.03<br>(458.86-574.95) | 574.13<br>(507.90-640.01) | 0.46<br>(0.44-0.49) | 7047.79<br>(6232.73-7902.98) | 7920.03<br>(6968.25-8955.27) | 0.51<br>(0.47-0.54) | 247.55<br>(117.55-502.41) | 282.11<br>(134.93-576.79) | 0.56<br>(0.52-0.59) |
| Lebanon                             | 435.82<br>(386.32-485.68) | 508.74<br>(448.00-564.39) | 0.37<br>(0.35-0.40) | 5584.99<br>(4968.90-6252.87) | 6601.22<br>(5883.40-7300.53) | 0.42<br>(0.39-0.45) | 191.32<br>(91.40-385.43)  | 227.15<br>(109.45-453.89) | 0.49<br>(0.45-0.53) |
| Lesotho                             | 433.46<br>(383.82-484.21) | 504.29<br>(447.08-559.17) | 0.50<br>(0.46-0.53) | 5446.96<br>(4831.75-6051.35) | 6488.47<br>(5745.11-7198.35) | 0.54<br>(0.51-0.57) | 187.32<br>(90.63-373.79)  | 222.40<br>(106.73-451.47) | 0.56<br>(0.53-0.59) |
| Liberia                             | 432.33<br>(384.14-485.35) | 483.81<br>(427.55-539.80) | 0.53<br>(0.51-0.55) | 5391.26<br>(4783.97-6010.30) | 6111.05<br>(5430.77-6772.88) | 0.62<br>(0.59-0.65) | 181.45<br>(87.44-362.61)  | 208.11<br>(100.37-423.06) | 0.61<br>(0.58-0.65) |
| Libya                               | 453.84<br>(400.43-504.46) | 503.98<br>(443.81-558.83) | 0.45<br>(0.41-0.49) | 5860.10<br>(5206.23-6521.70) | 6530.77<br>(5787.05-7228.17) | 0.50<br>(0.45-0.55) | 202.92<br>(96.32-412.74)  | 225.21<br>(107.82-453.27) | 0.56<br>(0.50-0.61) |
| Lithuania                           | 511.24<br>(452.64-572.02) | 568.44<br>(499.89-637.71) | 0.35<br>(0.32-0.38) | 6922.38<br>(6106.09-7812.01) | 7829.53<br>(6905.47-8826.83) | 0.36<br>(0.32-0.39) | 243.17<br>(116.35-491.92) | 278.30<br>(132.64-574.62) | 0.34<br>(0.31-0.38) |
| Luxembourg                          | 517.72<br>(462.11-579.82) | 549.70<br>(491.73-611.82) | 0.40<br>(0.37-0.42) | 6740.38<br>(6069.67-7446.97) | 7055.12<br>(6350.95-7786.37) | 0.46<br>(0.43-0.50) | 238.81<br>(115.50-483.36) | 251.93<br>(122.45-509.09) | 0.51<br>(0.48-0.55) |
| Madagascar                          | 387.82<br>(341.63-435.90) | 408.20<br>(360.87-454.33) | 0.17<br>(0.15-0.18) | 4777.37<br>(4264.66-5337.38) | 5050.98<br>(4487.25-5638.64) | 0.14<br>(0.12-0.15) | 161.83<br>(78.28-325.10)  | 172.41<br>(82.83-346.84)  | 0.16<br>(0.14-0.18) |
| Malawi                              | 401.64<br>(356.05-448.51) | 441.17<br>(389.27-493.50) | 0.18<br>(0.17-0.19) | 4979.87<br>(4428.52-5585.09) | 5536.18<br>(4902.49-6192.45) | 0.19<br>(0.18-0.21) | 168.71<br>(81.54-339.58)  | 189.73<br>(91.76-382.09)  | 0.23<br>(0.21-0.24) |
| Malaysia                            | 411.58<br>(363.02-457.65) | 473.66<br>(417.83-527.02) | 0.34<br>(0.33-0.35) | 5386.56<br>(4753.29-5990.01) | 6267.07<br>(5520.08-6965.71) | 0.38<br>(0.36-0.39) | 185.03<br>(87.55-370.73)  | 217.70<br>(103.87-443.51) | 0.44<br>(0.42-0.46) |
| Maldives                            | 394.84<br>(347.18-439.80) | 456.17<br>(400.23-506.73) | 0.47<br>(0.46-0.49) | 5162.56<br>(4558.25-5779.79) | 6113.49<br>(5332.08-6842.20) | 0.49<br>(0.47-0.52) | 177.55<br>(84.70-359.45)  | 213.79<br>(101.95-429.88) | 0.54<br>(0.52-0.56) |
| Mali                                | 404.78<br>(356.37-453.36) | 445.03<br>(394.43-496.85) | 0.49<br>(0.46-0.53) | 5003.74<br>(4436.31-5625.95) | 5557.47<br>(4934.97-6183.51) | 0.55<br>(0.53-0.58) | 168.89<br>(80.93-338.21)  | 189.59<br>(91.88-381.30)  | 0.61<br>(0.58-0.65) |
| Malta                               | 514.89<br>(455.64-572.87) | 551.31<br>(491.66-613.98) | 0.31<br>(0.30-0.31) | 6659.62<br>(5938.22-7376.78) | 7071.75<br>(6385.67-7831.83) | 0.34<br>(0.34-0.35) | 236.77<br>(115.32-472.40) | 252.86<br>(122.60-508.25) | 0.39<br>(0.38-0.39) |
| Marshall Islands                    | 483.80<br>(425.40-539.62) | 540.81<br>(474.60-600.25) | 0.18<br>(0.15-0.21) | 6338.84<br>(5581.77-7083.13) | 7072.47<br>(6217.97-7882.15) | 0.17<br>(0.14-0.20) | 219.31<br>(104.67-440.29) | 244.86<br>(116.04-495.27) | 0.19<br>(0.15-0.23) |
| Mauritania                          | 442.99<br>(390.85-495.64) | 500.54<br>(441.28-558.33) | 0.33<br>(0.31-0.36) | 5543.30<br>(4943.52-6184.44) | 6313.63<br>(5564.19-6966.39) | 0.32<br>(0.29-0.35) | 190.19<br>(92.23-388.04)  | 220.12<br>(105.28-443.81) | 0.32<br>(0.29-0.35) |
| Mauritius                           | 426.21<br>(374.78-474.79) | 483.28<br>(426.38-540.07) | 0.37<br>(0.35-0.38) | 5628.46<br>(4946.82-6267.53) | 6427.34<br>(5638.19-7185.67) | 0.39<br>(0.37-0.41) | 193.69<br>(92.30-391.76)  | 222.26<br>(106.14-445.17) | 0.45<br>(0.43-0.46) |
| Mexico                              | 549.16<br>(485.53-609.06) | 617.03<br>(544.47-681.41) | 0.43<br>(0.42-0.44) | 6890.62<br>(6125.73-7623.91) | 7826.53<br>(6918.85-8646.82) | 0.44<br>(0.43-0.46) | 239.45<br>(114.45-484.81) | 277.12<br>(132.54-558.87) | 0.46<br>(0.45-0.48) |
| Micronesia<br>(Federated States of) | 489.52<br>(430.63-543.96) | 550.86<br>(485.32-611.78) | 0.41<br>(0.39-0.43) | 6346.09<br>(5630.55-7059.52) | 7191.63<br>(6345.37-7963.08) | 0.46<br>(0.43-0.49) | 219.37<br>(104.24-438.86) | 250.51<br>(119.72-500.88) | 0.52<br>(0.49-0.55) |

|                          |                           |                           |                      |                              |                              |                       |                           |                           |                       |
|--------------------------|---------------------------|---------------------------|----------------------|------------------------------|------------------------------|-----------------------|---------------------------|---------------------------|-----------------------|
| Monaco                   | 536.83<br>(480.55-597.82) | 566.68<br>(505.30-629.25) | 0.35<br>(0.30-0.41)  | 6940.07<br>(6234.74-7689.48) | 7238.13<br>(6514.11-7963.94) | 0.38<br>(0.32-0.43)   | 248.76<br>(118.94-503.98) | 259.79<br>(124.70-520.48) | 0.40<br>(0.34-0.45)   |
| Mongolia                 | 421.97<br>(371.58-472.44) | 517.10<br>(448.90-583.24) | 0.15<br>(0.14-0.16)  | 5744.98<br>(5009.96-6500.22) | 7361.05<br>(6383.13-8508.66) | 0.13<br>(0.12-0.14)   | 200.49<br>(96.11-401.54)  | 260.86<br>(124.73-529.12) | 0.14<br>(0.12-0.15)   |
| Montenegro               | 490.10<br>(430.27-544.71) | 520.39<br>(455.72-581.45) | 0.69<br>(0.65-0.73)  | 6534.03<br>(5736.13-7303.23) | 6982.04<br>(6128.84-7825.05) | 0.87<br>(0.82-0.92)   | 230.26<br>(110.50-464.37) | 246.54<br>(117.94-504.22) | 0.93<br>(0.88-0.98)   |
| Morocco                  | 430.06<br>(380.30-478.99) | 473.51<br>(419.47-527.28) | 0.24<br>(0.23-0.26)  | 5503.53<br>(4899.07-6127.99) | 6061.39<br>(5386.56-6727.52) | 0.26<br>(0.25-0.28)   | 189.02<br>(90.88-386.39)  | 207.00<br>(99.31-422.84)  | 0.28<br>(0.26-0.30)   |
| Mozambique               | 393.94<br>(348.00-439.98) | 432.72<br>(382.52-481.34) | 0.28<br>(0.25-0.31)  | 4868.36<br>(4318.74-5423.74) | 5413.36<br>(4778.29-6077.61) | 0.27<br>(0.23-0.31)   | 163.40<br>(78.32-330.18)  | 183.15<br>(87.86-370.97)  | 0.25<br>(0.20-0.29)   |
| Myanmar                  | 358.73<br>(318.00-397.31) | 423.47<br>(373.22-470.01) | 0.32<br>(0.30-0.33)  | 4569.29<br>(4058.26-5124.49) | 5509.96<br>(4883.59-6154.18) | 0.36<br>(0.34-0.37)   | 154.51<br>(74.29-312.45)  | 189.01<br>(90.46-376.10)  | 0.40<br>(0.38-0.42)   |
| Namibia                  | 435.73<br>(384.48-486.90) | 491.31<br>(434.64-546.38) | 0.61<br>(0.58-0.64)  | 5491.05<br>(4865.00-6137.22) | 6282.58<br>(5591.32-6986.71) | 0.68<br>(0.64-0.71)   | 189.21<br>(92.31-383.13)  | 217.66<br>(104.04-438.91) | 0.74<br>(0.70-0.78)   |
| Nauru                    | 498.59<br>(439.16-555.24) | 565.58<br>(496.77-627.82) | 0.35<br>(0.33-0.38)  | 6469.66<br>(5732.81-7183.72) | 7401.39<br>(6526.73-8232.71) | 0.40<br>(0.37-0.43)   | 224.67<br>(106.75-447.42) | 257.73<br>(123.00-512.70) | 0.42<br>(0.39-0.45)   |
| Nepal                    | 387.57<br>(345.59-431.61) | 446.59<br>(398.83-496.31) | 0.38<br>(0.36-0.40)  | 4848.20<br>(4313.74-5394.94) | 5637.45<br>(5020.51-6276.11) | 0.41<br>(0.38-0.43)   | 161.56<br>(78.73-329.46)  | 190.42<br>(92.16-385.86)  | 0.42<br>(0.39-0.45)   |
| Netherlands              | 536.48<br>(482.43-594.24) | 562.31<br>(499.26-625.49) | 0.48<br>(0.45-0.51)  | 7007.11<br>(6413.98-7691.19) | 7179.66<br>(6487.57-7948.13) | 0.51<br>(0.48-0.53)   | 250.65<br>(121.91-504.45) | 256.35<br>(123.40-520.44) | 0.55<br>(0.52-0.58)   |
| New Zealand              | 563.05<br>(500.62-625.21) | 622.04<br>(553.44-687.72) | 0.06<br>(-0.01-0.14) | 7201.53<br>(6453.83-7965.55) | 7851.94<br>(7027.87-8662.21) | -0.01<br>(-0.09-0.08) | 254.13<br>(122.95-512.36) | 281.65<br>(134.65-568.23) | -0.03<br>(-0.12-0.07) |
| Nicaragua                | 480.78<br>(422.73-533.68) | 542.53<br>(479.59-605.28) | 0.31<br>(0.29-0.33)  | 6028.68<br>(5350.19-6702.72) | 6877.36<br>(6091.92-7616.93) | 0.28<br>(0.26-0.30)   | 207.89<br>(100.06-419.25) | 238.86<br>(116.01-483.03) | 0.33<br>(0.30-0.35)   |
| Niger                    | 399.91<br>(353.17-443.53) | 423.84<br>(375.53-472.84) | 0.40<br>(0.37-0.42)  | 4942.51<br>(4402.73-5542.87) | 5232.06<br>(4650.16-5890.50) | 0.43<br>(0.41-0.45)   | 167.32<br>(81.73-336.66)  | 178.35<br>(86.39-355.00)  | 0.45<br>(0.43-0.48)   |
| Nigeria                  | 450.16<br>(398.00-500.71) | 498.72<br>(440.84-553.16) | 0.18<br>(0.18-0.19)  | 5626.71<br>(4985.17-6276.04) | 6255.95<br>(5535.47-6973.39) | 0.18<br>(0.18-0.19)   | 192.41<br>(92.65-388.43)  | 217.13<br>(104.48-439.38) | 0.21<br>(0.21-0.22)   |
| Niue                     | 520.49<br>(460.94-581.93) | 584.10<br>(517.25-647.85) | 0.35<br>(0.31-0.40)  | 6805.20<br>(6053.21-7651.00) | 7654.17<br>(6773.95-8485.39) | 0.37<br>(0.33-0.42)   | 237.44<br>(113.56-477.26) | 268.12<br>(129.45-536.33) | 0.43<br>(0.39-0.48)   |
| North Macedonia          | 453.81<br>(402.11-505.54) | 496.39<br>(437.42-552.48) | 0.36<br>(0.33-0.40)  | 5939.21<br>(5255.63-6635.68) | 6595.38<br>(5821.31-7362.79) | 0.37<br>(0.33-0.41)   | 206.54<br>(98.87-419.99)  | 230.94<br>(111.13-468.16) | 0.39<br>(0.35-0.43)   |
| Northern Mariana Islands | 525.90<br>(465.45-584.25) | 571.41<br>(503.61-639.83) | 0.33<br>(0.32-0.35)  | 6928.34<br>(6124.78-7717.16) | 7473.14<br>(6649.55-8256.84) | 0.39<br>(0.37-0.41)   | 244.05<br>(117.02-494.33) | 263.59<br>(124.96-531.34) | 0.43<br>(0.40-0.45)   |
| Norway                   | 527.78<br>(468.90-586.59) | 566.43<br>(504.41-629.34) | 0.21<br>(0.16-0.26)  | 6810.29<br>(6081.69-7529.30) | 7194.44<br>(6445.14-7978.71) | 0.19<br>(0.14-0.24)   | 241.23<br>(116.18-483.89) | 257.93<br>(124.39-518.57) | 0.19<br>(0.14-0.24)   |
| Oman                     | 423.69<br>(377.23-472.04) | 501.17<br>(444.48-559.73) | 0.28<br>(0.19-0.37)  | 5553.44<br>(4912.60-6176.06) | 6610.79<br>(5877.94-7322.45) | 0.26<br>(0.15-0.37)   | 190.09<br>(91.78-387.39)  | 229.48<br>(109.88-462.56) | 0.32<br>(0.19-0.45)   |
| Pakistan                 | 394.09<br>(346.61-441.36) | 457.98<br>(402.52-509.95) | 0.57<br>(0.54-0.60)  | 4966.42<br>(4389.77-5580.03) | 5854.83<br>(5137.27-6550.19) | 0.58<br>(0.56-0.60)   | 168.48<br>(79.89-341.15)  | 200.60<br>(95.98-403.02)  | 0.63<br>(0.61-0.66)   |
| Palau                    | 523.52<br>(461.21-583.20) | 577.27<br>(510.57-644.04) | 0.52<br>(0.50-0.54)  | 6836.86<br>(6071.43-7611.03) | 7584.40<br>(6727.15-8413.92) | 0.56<br>(0.54-0.58)   | 238.52<br>(113.71-486.33) | 264.80<br>(126.34-530.31) | 0.59<br>(0.58-0.61)   |
| Palestine                | 431.54<br>(383.21-482.87) | 482.51<br>(423.88-538.85) | 0.29<br>(0.25-0.32)  | 5473.46<br>(4856.53-6145.15) | 6252.59<br>(5540.47-6945.76) | 0.30<br>(0.26-0.34)   | 187.46<br>(90.89-375.80)  | 214.84<br>(102.84-438.13) | 0.30<br>(0.25-0.34)   |
| Panama                   | 489.36<br>(432.95-543.53) | 557.46<br>(495.29-619.08) | 0.33<br>(0.31-0.36)  | 6212.11<br>(5507.84-6917.34) | 7127.00<br>(6334.22-7844.65) | 0.40<br>(0.38-0.43)   | 216.38<br>(103.08-435.86) | 250.60<br>(120.45-502.55) | 0.42<br>(0.40-0.44)   |
| Papua New Guinea         | 418.16<br>(367.93-466.12) | 458.49<br>(402.59-512.05) | 0.40<br>(0.39-0.41)  | 5273.87<br>(4678.32-5859.78) | 5806.13<br>(5140.09-6474.72) | 0.42<br>(0.41-0.43)   | 178.21<br>(85.94-357.89)  | 197.86<br>(96.02-398.60)  | 0.45<br>(0.43-0.46)   |



|                                  |                           |                           |                     |                              |                              |                     |                           |                           |                     |
|----------------------------------|---------------------------|---------------------------|---------------------|------------------------------|------------------------------|---------------------|---------------------------|---------------------------|---------------------|
| Paraguay                         | 523.21<br>(462.64-581.96) | 552.50<br>(490.16-612.86) | 0.27<br>(0.26-0.28) | 6693.27<br>(5932.58-7381.73) | 7045.67<br>(6223.98-7826.86) | 0.28<br>(0.26-0.29) | 234.44<br>(112.25-472.60) | 246.42<br>(116.75-501.02) | 0.31<br>(0.29-0.32) |
| Peru                             | 520.82<br>(462.16-579.79) | 578.82<br>(509.40-641.16) | 0.18<br>(0.14-0.22) | 6641.17<br>(5895.34-7382.66) | 7387.15<br>(6546.68-8191.56) | 0.16<br>(0.11-0.21) | 233.73<br>(112.96-473.00) | 262.45<br>(125.87-531.72) | 0.16<br>(0.10-0.22) |
| Philippines                      | 379.14<br>(333.45-423.79) | 436.09<br>(382.63-485.96) | 0.34<br>(0.32-0.36) | 4937.21<br>(4334.29-5512.24) | 5704.12<br>(4994.45-6360.81) | 0.33<br>(0.31-0.36) | 168.30<br>(79.99-338.38)  | 197.17<br>(93.94-396.21)  | 0.36<br>(0.33-0.39) |
| Poland                           | 485.83<br>(428.33-540.86) | 545.91<br>(480.16-607.04) | 0.42<br>(0.39-0.46) | 6352.60<br>(5622.61-7107.47) | 7209.37<br>(6359.02-8062.52) | 0.42<br>(0.38-0.45) | 220.78<br>(106.13-445.93) | 255.44<br>(122.70-514.99) | 0.46<br>(0.42-0.50) |
| Portugal                         | 499.38<br>(446.73-554.39) | 545.22<br>(488.28-604.98) | 0.40<br>(0.38-0.41) | 6419.41<br>(5732.16-7112.09) | 6967.51<br>(6290.48-7707.56) | 0.43<br>(0.41-0.46) | 225.43<br>(109.11-455.69) | 247.29<br>(118.83-498.32) | 0.51<br>(0.48-0.54) |
| Puerto Rico                      | 579.84<br>(514.61-646.56) | 625.47<br>(556.85-693.46) | 0.35<br>(0.27-0.43) | 7421.24<br>(6620.21-8213.12) | 8021.69<br>(7104.50-8862.45) | 0.39<br>(0.28-0.50) | 263.80<br>(126.22-528.30) | 285.66<br>(136.91-575.20) | 0.46<br>(0.33-0.58) |
| Qatar                            | 471.63<br>(416.68-524.49) | 518.18<br>(460.61-577.47) | 0.27<br>(0.25-0.29) | 6220.40<br>(5474.07-6930.89) | 6835.35<br>(6109.62-7568.07) | 0.28<br>(0.26-0.30) | 215.51<br>(103.38-433.91) | 236.31<br>(114.23-472.87) | 0.29<br>(0.27-0.31) |
| Republic of Korea                | 665.91<br>(592.27-739.15) | 701.23<br>(625.36-776.78) | 0.25<br>(0.23-0.28) | 8639.54<br>(7715.08-9501.27) | 8997.39<br>(8082.99-9897.80) | 0.27<br>(0.24-0.29) | 310.35<br>(149.89-629.38) | 327.14<br>(157.44-662.81) | 0.26<br>(0.24-0.28) |
| Republic of Moldova              | 466.87<br>(413.24-517.77) | 527.51<br>(467.44-589.45) | 0.26<br>(0.15-0.37) | 6181.68<br>(5461.83-6881.08) | 7085.48<br>(6248.88-7948.01) | 0.23<br>(0.12-0.34) | 215.04<br>(102.74-436.54) | 250.31<br>(119.74-501.88) | 0.28<br>(0.15-0.40) |
| Romania                          | 451.25<br>(400.32-499.77) | 492.13<br>(434.73-545.08) | 0.50<br>(0.43-0.56) | 5917.37<br>(5251.77-6600.81) | 6494.95<br>(5751.53-7224.19) | 0.56<br>(0.48-0.64) | 205.84<br>(98.80-413.85)  | 229.11<br>(108.11-463.15) | 0.62<br>(0.54-0.71) |
| Russian Federation               | 567.41<br>(498.64-635.22) | 595.22<br>(523.11-664.62) | 0.32<br>(0.31-0.34) | 7889.89<br>(6889.74-8937.70) | 8051.32<br>(7065.94-9048.10) | 0.35<br>(0.33-0.37) | 278.77<br>(132.59-565.82) | 286.24<br>(137.07-579.34) | 0.41<br>(0.38-0.43) |
| Rwanda                           | 393.20<br>(349.16-439.83) | 426.56<br>(375.22-474.36) | 0.27<br>(0.23-0.30) | 4847.03<br>(4312.01-5421.17) | 5300.37<br>(4691.85-5937.64) | 0.23<br>(0.18-0.29) | 164.19<br>(78.80-330.13)  | 181.00<br>(87.52-364.52)  | 0.28<br>(0.21-0.34) |
| Saint Kitts and Nevis            | 542.16<br>(477.32-601.08) | 588.16<br>(521.19-651.58) | 0.29<br>(0.27-0.31) | 6945.60<br>(6130.20-7686.98) | 7571.27<br>(6700.23-8384.82) | 0.32<br>(0.30-0.34) | 244.01<br>(116.79-490.25) | 267.40<br>(127.24-537.19) | 0.36<br>(0.33-0.39) |
| Saint Lucia                      | 507.97<br>(448.15-566.44) | 567.98<br>(502.87-628.95) | 0.26<br>(0.25-0.28) | 6415.95<br>(5699.45-7143.84) | 7248.65<br>(6444.19-8008.88) | 0.28<br>(0.26-0.29) | 222.62<br>(107.61-452.77) | 254.17<br>(122.58-513.27) | 0.30<br>(0.28-0.31) |
| Saint Vincent and the Grenadines | 504.61<br>(449.56-563.01) | 558.35<br>(492.89-624.11) | 0.33<br>(0.30-0.37) | 6397.95<br>(5679.70-7065.58) | 7102.72<br>(6286.60-7848.03) | 0.36<br>(0.32-0.40) | 223.20<br>(106.16-449.77) | 248.54<br>(120.13-511.44) | 0.39<br>(0.35-0.44) |
| Samoa                            | 501.83<br>(442.89-558.99) | 554.50<br>(488.20-621.23) | 0.35<br>(0.34-0.37) | 6490.46<br>(5805.31-7196.06) | 7229.28<br>(6387.21-8051.03) | 0.36<br>(0.34-0.38) | 224.83<br>(107.81-446.44) | 252.00<br>(121.02-504.65) | 0.37<br>(0.35-0.39) |
| San Marino                       | 524.79<br>(466.35-586.08) | 561.86<br>(499.88-630.44) | 0.32<br>(0.30-0.33) | 6783.34<br>(6108.04-7523.27) | 7145.91<br>(6446.11-7953.04) | 0.35<br>(0.34-0.36) | 241.43<br>(118.01-484.73) | 255.32<br>(123.31-515.39) | 0.37<br>(0.36-0.39) |
| Sao Tome and Principe            | 449.75<br>(398.28-501.90) | 524.21<br>(462.18-582.24) | 0.20<br>(0.18-0.21) | 5685.90<br>(5023.11-6379.01) | 6782.54<br>(5994.58-7537.66) | 0.16<br>(0.14-0.18) | 196.47<br>(94.67-403.55)  | 238.24<br>(114.64-481.44) | 0.17<br>(0.15-0.19) |
| Saudi Arabia                     | 438.33<br>(387.05-487.74) | 519.02<br>(457.66-575.01) | 0.51<br>(0.49-0.53) | 5667.97<br>(5009.98-6297.62) | 6748.90<br>(5982.75-7462.24) | 0.60<br>(0.57-0.63) | 193.15<br>(93.26-388.67)  | 232.61<br>(112.24-467.66) | 0.66<br>(0.63-0.69) |
| Senegal                          | 433.81<br>(381.84-484.04) | 475.47<br>(416.82-528.94) | 0.34<br>(0.26-0.43) | 5413.82<br>(4796.04-6047.40) | 6000.67<br>(5295.74-6683.86) | 0.26<br>(0.14-0.39) | 184.61<br>(88.68-373.17)  | 206.53<br>(98.57-415.10)  | 0.27<br>(0.14-0.41) |
| Serbia                           | 454.10<br>(402.28-504.77) | 501.27<br>(442.69-560.42) | 0.26<br>(0.25-0.28) | 5940.02<br>(5240.90-6624.06) | 6639.37<br>(5843.91-7416.34) | 0.29<br>(0.28-0.31) | 207.20<br>(98.31-417.56)  | 233.45<br>(111.10-471.88) | 0.32<br>(0.31-0.34) |
| Seychelles                       | 425.83<br>(375.95-474.19) | 484.27<br>(424.30-538.98) | 0.37<br>(0.36-0.39) | 5597.53<br>(4954.42-6239.91) | 6468.72<br>(5702.10-7176.25) | 0.42<br>(0.40-0.44) | 194.22<br>(92.43-387.60)  | 224.69<br>(107.34-452.80) | 0.46<br>(0.43-0.48) |
| Sierra Leone                     | 410.11<br>(361.85-459.47) | 456.66<br>(405.02-507.81) | 0.41<br>(0.38-0.45) | 5080.13<br>(4526.96-5700.05) | 5743.70<br>(5103.84-6394.00) | 0.45<br>(0.41-0.49) | 171.91<br>(83.49-344.78)  | 197.17<br>(94.57-398.34)  | 0.46<br>(0.41-0.50) |
| Singapore                        | 662.46<br>(583.53-735.49) | 685.67<br>(606.53-760.52) | 0.34<br>(0.32-0.37) | 8553.41<br>(7625.49-9400.16) | 8795.59<br>(7834.77-9662.12) | 0.39<br>(0.36-0.42) | 312.25<br>(148.94-621.24) | 323.81<br>(156.07-648.84) | 0.45<br>(0.41-0.48) |

|                               |                           |                           |                     |                              |                              |                     |                           |                           |                     |
|-------------------------------|---------------------------|---------------------------|---------------------|------------------------------|------------------------------|---------------------|---------------------------|---------------------------|---------------------|
| Slovakia                      | 493.73<br>(434.26-553.74) | 530.37<br>(465.34-589.97) | 0.07<br>(0.06-0.09) | 6633.92<br>(5808.75-7454.60) | 7172.31<br>(6328.32-8022.93) | 0.08<br>(0.07-0.09) | 231.89<br>(109.63-471.96) | 253.76<br>(121.46-514.80) | 0.11<br>(0.10-0.13) |
| Slovenia                      | 491.11<br>(431.90-546.56) | 525.36<br>(463.12-586.40) | 0.22<br>(0.20-0.24) | 6626.19<br>(5823.73-7430.59) | 7066.98<br>(6214.38-7901.68) | 0.24<br>(0.21-0.26) | 231.24<br>(109.64-465.72) | 249.66<br>(119.93-506.22) | 0.28<br>(0.25-0.30) |
| Solomon Islands               | 444.64<br>(392.62-495.53) | 506.17<br>(444.44-563.70) | 0.22<br>(0.20-0.25) | 5668.76<br>(5030.93-6322.85) | 6521.52<br>(5770.18-7279.33) | 0.20<br>(0.18-0.23) | 194.58<br>(93.43-392.85)  | 225.65<br>(107.13-452.46) | 0.24<br>(0.21-0.27) |
| Somalia                       | 397.57<br>(350.12-443.01) | 413.53<br>(365.08-463.06) | 0.40<br>(0.37-0.43) | 4936.42<br>(4380.82-5554.07) | 5154.48<br>(4571.28-5746.80) | 0.43<br>(0.40-0.46) | 167.54<br>(80.77-340.99)  | 175.08<br>(84.25-352.26)  | 0.45<br>(0.42-0.48) |
| South Africa                  | 538.52<br>(477.00-598.27) | 579.68<br>(513.41-643.73) | 0.16<br>(0.15-0.17) | 6897.67<br>(6089.39-7678.13) | 7437.78<br>(6576.71-8268.63) | 0.17<br>(0.16-0.19) | 241.82<br>(116.11-486.72) | 259.73<br>(125.61-521.32) | 0.19<br>(0.17-0.20) |
| South Sudan                   | 391.68<br>(345.93-437.05) | 419.30<br>(370.66-468.51) | 0.26<br>(0.25-0.27) | 4833.03<br>(4315.14-5389.30) | 5173.45<br>(4585.44-5772.62) | 0.28<br>(0.26-0.29) | 161.50<br>(78.48-322.42)  | 173.75<br>(83.86-349.85)  | 0.27<br>(0.25-0.29) |
| Spain                         | 509.74<br>(452.16-570.09) | 550.53<br>(490.54-613.91) | 0.24<br>(0.23-0.25) | 6585.06<br>(5902.27-7293.35) | 7067.43<br>(6346.65-7834.40) | 0.25<br>(0.23-0.26) | 233.09<br>(112.14-466.70) | 252.41<br>(121.52-509.81) | 0.27<br>(0.26-0.29) |
| Sri Lanka                     | 380.91<br>(336.17-423.87) | 438.19<br>(385.54-486.66) | 0.23<br>(0.20-0.26) | 4907.64<br>(4340.57-5473.98) | 5737.33<br>(5047.68-6405.69) | 0.25<br>(0.22-0.29) | 167.17<br>(79.94-337.48)  | 196.48<br>(93.15-395.00)  | 0.27<br>(0.23-0.31) |
| Sudan                         | 374.78<br>(330.89-417.35) | 451.05<br>(400.85-502.02) | 0.48<br>(0.46-0.49) | 4649.53<br>(4118.90-5216.84) | 5699.10<br>(5039.27-6361.30) | 0.52<br>(0.51-0.53) | 156.88<br>(75.28-315.18)  | 195.16<br>(93.83-392.69)  | 0.54<br>(0.52-0.56) |
| Suriname                      | 539.08<br>(474.72-599.35) | 583.07<br>(515.65-644.18) | 0.62<br>(0.58-0.67) | 6909.37<br>(6124.45-7648.52) | 7492.59<br>(6632.25-8310.76) | 0.69<br>(0.64-0.74) | 243.78<br>(115.72-497.39) | 263.42<br>(126.60-526.28) | 0.74<br>(0.69-0.80) |
| Sweden                        | 448.03<br>(393.92-504.34) | 490.50<br>(429.31-550.45) | 0.28<br>(0.27-0.29) | 5721.62<br>(5030.11-6419.35) | 6206.46<br>(5449.73-6981.99) | 0.29<br>(0.28-0.30) | 201.04<br>(94.46-412.76)  | 219.94<br>(103.56-446.30) | 0.29<br>(0.27-0.30) |
| Switzerland                   | 512.78<br>(455.29-571.81) | 536.25<br>(478.09-595.83) | 0.38<br>(0.20-0.56) | 6659.33<br>(5952.03-7400.47) | 6869.39<br>(6203.94-7594.36) | 0.40<br>(0.19-0.61) | 234.87<br>(113.98-474.03) | 243.32<br>(117.04-483.61) | 0.44<br>(0.21-0.68) |
| Syrian Arab Republic          | 421.30<br>(376.92-467.98) | 482.73<br>(425.82-541.86) | 0.13<br>(0.12-0.13) | 5315.64<br>(4725.16-5952.02) | 6178.65<br>(5461.63-6883.36) | 0.10<br>(0.10-0.10) | 181.91<br>(87.43-364.87)  | 212.96<br>(102.28-423.55) | 0.12<br>(0.11-0.12) |
| Taiwan<br>(Province of China) | 519.32<br>(456.78-584.18) | 594.32<br>(526.06-663.52) | 0.46<br>(0.44-0.47) | 6717.37<br>(5931.78-7456.00) | 7761.15<br>(6899.98-8652.98) | 0.52<br>(0.50-0.54) | 234.43<br>(112.04-470.13) | 273.91<br>(129.60-554.09) | 0.55<br>(0.52-0.57) |
| Tajikistan                    | 398.52<br>(351.00-447.99) | 437.73<br>(382.62-489.19) | 0.50<br>(0.47-0.52) | 5395.27<br>(4710.30-6124.38) | 5919.48<br>(5131.91-6713.73) | 0.52<br>(0.50-0.54) | 188.20<br>(90.38-379.32)  | 207.38<br>(99.15-415.74)  | 0.56<br>(0.53-0.58) |
| Thailand                      | 383.46<br>(337.94-423.76) | 462.73<br>(408.91-515.69) | 0.34<br>(0.29-0.40) | 4903.26<br>(4351.89-5480.03) | 5999.99<br>(5325.54-6676.29) | 0.34<br>(0.27-0.41) | 166.64<br>(81.37-337.43)  | 207.81<br>(100.02-418.95) | 0.36<br>(0.29-0.43) |
| Timor-Leste                   | 348.39<br>(306.28-389.21) | 400.38<br>(352.99-446.00) | 0.65<br>(0.63-0.66) | 4416.96<br>(3920.11-4966.90) | 5191.62<br>(4582.52-5781.30) | 0.69<br>(0.68-0.70) | 148.80<br>(71.51-300.75)  | 176.95<br>(84.18-358.22)  | 0.76<br>(0.74-0.77) |
| Togo                          | 421.50<br>(372.31-469.40) | 469.20<br>(415.21-524.26) | 0.52<br>(0.49-0.55) | 5239.90<br>(4654.07-5851.10) | 5942.02<br>(5283.59-6623.74) | 0.61<br>(0.57-0.65) | 178.46<br>(85.94-356.45)  | 205.46<br>(97.97-413.44)  | 0.67<br>(0.62-0.72) |
| Tokelau                       | 485.33<br>(427.99-541.92) | 561.14<br>(496.02-621.88) | 0.33<br>(0.31-0.35) | 6244.09<br>(5532.85-6958.76) | 7321.90<br>(6519.88-8126.66) | 0.39<br>(0.37-0.41) | 215.95<br>(104.32-435.22) | 255.45<br>(122.74-515.18) | 0.44<br>(0.42-0.47) |
| Tonga                         | 493.71<br>(435.22-550.03) | 548.75<br>(483.06-609.57) | 0.48<br>(0.45-0.51) | 6346.13<br>(5623.63-7059.81) | 7098.51<br>(6312.37-7929.74) | 0.52<br>(0.49-0.56) | 220.27<br>(105.41-444.73) | 247.51<br>(119.11-497.80) | 0.56<br>(0.53-0.60) |
| Trinidad and Tobago           | 542.83<br>(477.85-606.65) | 584.43<br>(517.34-650.64) | 0.28<br>(0.23-0.33) | 6946.98<br>(6166.35-7707.36) | 7493.92<br>(6678.70-8293.18) | 0.29<br>(0.24-0.35) | 243.98<br>(116.21-492.29) | 263.61<br>(127.05-542.33) | 0.31<br>(0.25-0.37) |
| Tunisia                       | 429.98<br>(379.47-481.71) | 492.79<br>(438.30-545.86) | 0.28<br>(0.26-0.30) | 5476.94<br>(4853.16-6104.75) | 6374.66<br>(5640.98-7079.66) | 0.29<br>(0.27-0.31) | 188.28<br>(89.50-382.15)  | 219.92<br>(106.32-446.51) | 0.30<br>(0.27-0.32) |
| Turkmenistan                  | 431.32<br>(381.15-485.90) | 504.12<br>(440.58-569.61) | 0.45<br>(0.44-0.46) | 5900.62<br>(5140.52-6667.35) | 7040.77<br>(6084.80-8034.71) | 0.50<br>(0.49-0.51) | 207.07<br>(99.30-418.51)  | 250.85<br>(118.85-501.52) | 0.52<br>(0.50-0.54) |
| Tuvalu                        | 483.16<br>(425.55-536.43) | 547.04<br>(481.10-611.49) | 0.56<br>(0.52-0.60) | 6213.43<br>(5507.54-6931.80) | 7164.29<br>(6313.54-8004.47) | 0.63<br>(0.57-0.69) | 215.00<br>(102.66-438.95) | 250.57<br>(118.95-512.59) | 0.69<br>(0.62-0.76) |

|                                    |                           |                           |                      |                              |                              |                      |                           |                           |                      |
|------------------------------------|---------------------------|---------------------------|----------------------|------------------------------|------------------------------|----------------------|---------------------------|---------------------------|----------------------|
| Türkiye                            | 432.28<br>(383.55-478.70) | 504.54<br>(447.64-564.47) | 0.37<br>(0.33-0.41)  | 5451.00<br>(4840.24-6098.01) | 6494.84<br>(5774.23-7194.61) | 0.43<br>(0.39-0.47)  | 186.92<br>(89.85-377.73)  | 225.44<br>(108.35-455.74) | 0.48<br>(0.44-0.52)  |
| Uganda                             | 393.38<br>(345.16-440.69) | 432.88<br>(383.31-481.65) | 0.51<br>(0.44-0.57)  | 4869.53<br>(4324.75-5462.94) | 5411.13<br>(4799.77-6007.11) | 0.57<br>(0.49-0.65)  | 164.44<br>(79.49-331.17)  | 185.04<br>(89.61-375.17)  | 0.61<br>(0.51-0.71)  |
| Ukraine                            | 523.44<br>(460.03-582.69) | 563.85<br>(495.98-629.08) | 0.32<br>(0.31-0.32)  | 6932.92<br>(6103.05-7792.59) | 7552.96<br>(6637.19-8518.02) | 0.35<br>(0.34-0.35)  | 243.21<br>(118.00-492.05) | 267.24<br>(127.59-536.33) | 0.40<br>(0.39-0.41)  |
| United Arab Emirates               | 442.64<br>(390.98-493.56) | 492.29<br>(435.28-547.19) | 0.27<br>(0.25-0.29)  | 5833.58<br>(5145.39-6506.84) | 6385.07<br>(5686.29-7057.91) | 0.30<br>(0.28-0.33)  | 200.85<br>(95.71-407.28)  | 220.60<br>(104.60-444.37) | 0.35<br>(0.33-0.38)  |
| United Kingdom                     | 553.89<br>(494.51-614.65) | 599.09<br>(535.27-664.80) | 0.36<br>(0.34-0.38)  | 7062.83<br>(6351.53-7819.47) | 7557.53<br>(6798.39-8354.38) | 0.30<br>(0.27-0.33)  | 251.97<br>(121.31-505.51) | 271.03<br>(130.90-542.66) | 0.32<br>(0.28-0.35)  |
| United Republic of Tanzania        | 425.28<br>(376.47-472.64) | 453.74<br>(402.88-504.99) | 0.15<br>(0.03-0.26)  | 5346.65<br>(4755.87-5958.26) | 5701.50<br>(5083.81-6350.48) | 0.11<br>(-0.02-0.24) | 182.42<br>(87.39-365.72)  | 196.17<br>(93.77-396.95)  | 0.11<br>(-0.04-0.26) |
| United States of America           | 626.75<br>(554.47-694.08) | 668.49<br>(591.69-739.57) | 0.13<br>(0.09-0.16)  | 8228.07<br>(7415.47-9087.48) | 8686.57<br>(7789.66-9568.34) | 0.10<br>(0.05-0.14)  | 295.34<br>(141.51-594.21) | 310.78<br>(149.65-627.25) | 0.12<br>(0.07-0.17)  |
| United States Virgin Islands       | 569.16<br>(503.11-631.10) | 612.16<br>(539.67-680.71) | 0.06<br>(-0.08-0.21) | 7283.17<br>(6447.04-8083.47) | 7850.62<br>(6982.97-8658.84) | 0.09<br>(-0.05-0.24) | 258.46<br>(124.49-520.07) | 278.10<br>(133.64-553.80) | 0.07<br>(-0.09-0.23) |
| Uruguay                            | 540.15<br>(478.19-600.17) | 595.28<br>(530.77-661.96) | 0.24<br>(0.22-0.27)  | 6998.28<br>(6221.71-7747.47) | 7656.56<br>(6885.19-8513.04) | 0.25<br>(0.22-0.27)  | 248.30<br>(118.53-493.38) | 272.99<br>(131.65-540.80) | 0.24<br>(0.21-0.27)  |
| Uzbekistan                         | 435.64<br>(382.79-491.51) | 498.85<br>(434.94-559.33) | 0.29<br>(0.27-0.31)  | 6016.32<br>(5236.04-6831.58) | 6911.10<br>(5988.98-7871.82) | 0.29<br>(0.27-0.31)  | 211.06<br>(102.14-426.42) | 244.62<br>(116.89-490.38) | 0.31<br>(0.29-0.33)  |
| Vanuatu                            | 429.49<br>(376.82-474.39) | 479.58<br>(425.49-537.88) | 0.43<br>(0.40-0.47)  | 5420.28<br>(4798.65-6034.68) | 6093.09<br>(5397.97-6783.92) | 0.43<br>(0.38-0.48)  | 184.98<br>(89.11-372.82)  | 209.10<br>(101.13-422.71) | 0.46<br>(0.41-0.51)  |
| Venezuela (Bolivarian Republic of) | 525.72<br>(464.16-586.56) | 568.58<br>(504.58-632.00) | 0.34<br>(0.33-0.35)  | 6720.09<br>(5958.04-7442.24) | 7290.87<br>(6435.35-8058.36) | 0.36<br>(0.35-0.37)  | 235.34<br>(113.35-469.68) | 256.79<br>(123.56-519.59) | 0.38<br>(0.37-0.39)  |
| Viet Nam                           | 351.54<br>(310.19-392.73) | 400.84<br>(350.75-445.43) | 0.16<br>(0.10-0.21)  | 4453.32<br>(3942.04-4957.73) | 5186.58<br>(4567.32-5777.21) | 0.15<br>(0.09-0.21)  | 151.39<br>(73.07-301.99)  | 178.97<br>(85.09-356.75)  | 0.15<br>(0.08-0.22)  |
| Yemen                              | 363.38<br>(320.07-407.27) | 421.25<br>(371.11-470.28) | 0.47<br>(0.45-0.49)  | 4516.35<br>(4006.31-5058.53) | 5330.19<br>(4703.28-5941.51) | 0.54<br>(0.51-0.56)  | 151.46<br>(72.95-310.15)  | 181.25<br>(87.44-367.28)  | 0.59<br>(0.57-0.61)  |
| Zambia                             | 430.51<br>(379.49-480.06) | 453.81<br>(400.90-504.97) | 0.56<br>(0.52-0.59)  | 5409.13<br>(4790.74-6032.38) | 5732.05<br>(5074.71-6383.16) | 0.63<br>(0.59-0.67)  | 185.17<br>(87.91-375.23)  | 196.37<br>(94.63-394.72)  | 0.69<br>(0.64-0.73)  |
| Zimbabwe                           | 429.34<br>(381.87-477.08) | 447.86<br>(394.32-502.70) | 0.18<br>(0.14-0.23)  | 5372.60<br>(4786.08-6015.11) | 5598.15<br>(4951.88-6252.71) | 0.21<br>(0.15-0.26)  | 184.56<br>(89.04-371.24)  | 190.98<br>(92.24-381.93)  | 0.22<br>(0.16-0.29)  |

**Table S5. Three countries and territories with the top and bottom burden of osteoarthritis in 1990 and 2021**

| Period | Measure           | Top three countries      |                          |                          |                   |                          |             | Bottom three countries |             |             |          |             |         |
|--------|-------------------|--------------------------|--------------------------|--------------------------|-------------------|--------------------------|-------------|------------------------|-------------|-------------|----------|-------------|---------|
|        |                   | Both                     | Number                   | Male                     | Number            | Female                   | Number      | Both                   | Number      | Male        | Number   | Female      | Number  |
| 1990   | Incident          | China                    | 4654141.48               | China                    | 1901278.42        | China                    | 2752863.06  | Nauru                  | 30.51       | Tuvalu      | 13.44    | Nauru       | 15.65   |
|        |                   | India                    | 2474842.12               | India                    | 1024082.24        | India                    | 1450759.88  | Niue                   | 10.74       | Niue        | 4.34     | Niue        | 6.39    |
|        |                   | United States of America | 1770581.66               | United States of America | 728335.54         | United States of America | 1042246.12  | Tokelau                | 6.10        | Tokelau     | 2.49     | Tokelau     | 3.61    |
|        | Prevalent         | China                    | 53352514.68              | China                    | 21295655.12       | China                    | 32056859.56 | Nauru                  | 318.47      | Nauru       | 161.07   | Nauru       | 157.40  |
|        |                   | India                    | 26639507.16              | India                    | 10790152.60       | India                    | 15849354.56 | Niue                   | 146.90      | Niue        | 56.64    | Niue        | 90.26   |
|        |                   | United States of America | 25007735.07              | United States of America | 9718583.51        | United States of America | 15289151.57 | Tokelau                | 82.32       | Tokelau     | 35.00    | Tokelau     | 47.32   |
|        | DALYs             | China                    | 1829415.63               | China                    | 732255.73         | China                    | 1097159.90  | Nauru                  | 11.06       | Nauru       | 5.61     | Nauru       | 5.45    |
|        |                   | United States of America | 900534.50                | India                    | 360607.28         | United States of America | 556048.02   | Niue                   | 5.12        | Niue        | 1.98     | Niue        | 3.15    |
|        |                   | India                    | 897470.86                | United States of America | 344486.48         | India                    | 536863.58   | Tokelau                | 2.85        | Tokelau     | 1.22     | Tokelau     | 1.64    |
|        | ASIR              | Republic of Korea        | 665.91                   | United States of America | 552.49            | Republic of Korea        | 812.06      | Viet Nam               | 351.54      | Timor-Leste | 300.10   | Timor-Leste | 399.20  |
|        |                   | Singapore                | 662.46                   | South Africa             | 521.93            | Singapore                | 811.74      | Cambodia               | 349.23      | Viet Nam    | 296.91   | Viet Nam    | 394.48  |
|        |                   | Brunei Darussalam        | 638.10                   | Russian Federation       | 513.60            | Brunei Darussalam        | 802.06      | Timor-Leste            | 348.39      | Cambodia    | 293.82   | Cambodia    | 391.25  |
|        | ASPR              | Republic of Korea        | 8639.54                  | United States of America | 7307.76           | Singapore                | 10335.82    | Viet Nam               | 4453.32     | Timor-Leste | 3867.83  | Yemen       | 4954.56 |
|        |                   | Singapore                | 8553.41                  | Russian Federation       | 6914.17           | Republic of Korea        | 10262.79    | Timor-Leste            | 4416.96     | Viet Nam    | 3817.40  | Viet Nam    | 4922.23 |
|        |                   | United States of America | 8228.07                  | South Africa             | 6650.71           | Brunei Darussalam        | 10198.37    | Cambodia               | 4390.22     | Cambodia    | 3761.32  | Cambodia    | 4854.34 |
| ASDR   | Singapore         | 312.25                   | United States of America | 258.67                   | Singapore         | 383.89                   | Viet Nam    | 151.39                 | Timor-Leste | 130.29      | Viet Nam | 167.35      |         |
|        | Republic of Korea | 310.35                   | Russian Federation       | 242.05                   | Brunei Darussalam | 374.18                   | Timor-Leste | 148.80                 | Viet Nam    | 129.82      | Yemen    | 165.58      |         |
|        | Brunei Darussalam | 295.71                   | South Africa             | 233.63                   | Republic of Korea | 373.92                   | Cambodia    | 147.32                 | Cambodia    | 126.69      | Cambodia | 162.55      |         |

|      |                   |                          |                          |                          |                   |                          |             |             |             |            |             |            |        |
|------|-------------------|--------------------------|--------------------------|--------------------------|-------------------|--------------------------|-------------|-------------|-------------|------------|-------------|------------|--------|
| 2021 | Incident          | China                    | 11652721.19              | China                    | 4671650.58        | China                    | 6981070.61  | Nauru       | 42.40       | Nauru      | 17.06       | Nauru      | 25.34  |
|      |                   | India                    | 6701764.08               | India                    | 2602746.96        | India                    | 4099017.11  | Niue        | 12.34       | Niue       | 5.20        | Niue       | 7.14   |
|      |                   | United States of America | 3192701.53               | United States of America | 1326096.12        | United States of America | 1866605.41  | Tokelau     | 8.04        | Tokelau    | 3.41        | Tokelau    | 4.63   |
|      | Prevalent         | China                    | 152848105.90             | China                    | 60235814.14       | China                    | 92612291.79 | Nauru       | 457.91      | Nauru      | 178.55      | Nauru      | 279.36 |
|      |                   | India                    | 79214251.02              | India                    | 29658088.49       | India                    | 49556162.53 | Niue        | 168.54      | Niue       | 68.78       | Niue       | 99.76  |
|      |                   | United States of America | 47581100.89              | United States of America | 19282206.37       | United States of America | 28298894.52 | Tokelau     | 108.22      | Tokelau    | 45.50       | Tokelau    | 62.72  |
|      | DALYs             | China                    | 5327389.98               | China                    | 2094854.20        | China                    | 3232535.78  | Nauru       | 15.92       | Nauru      | 6.21        | Nauru      | 9.72   |
|      |                   | India                    | 2718457.05               | India                    | 1004773.08        | India                    | 1713683.97  | Niue        | 5.91        | Niue       | 2.41        | Niue       | 3.50   |
|      |                   | United States of America | 1710760.12               | United States of America | 680232.84         | United States of America | 1030527.28  | Tokelau     | 3.78        | Tokelau    | 1.59        | Tokelau    | 2.19   |
|      | ASIR              | Republic of Korea        | 701.23                   | United States of America | 577.60            | Republic of Korea        | 859.15      | Viet Nam    | 400.84      | Tajikistan | 339.59      | Cambodia   | 446.00 |
|      |                   | Brunei Darussalam        | 686.67                   | South Africa             | 560.57            | Singapore                | 844.82      | Timor-Leste | 400.38      | Viet Nam   | 338.85      | Somalia    | 444.99 |
|      |                   | Singapore                | 685.67                   | Mexico                   | 560.42            | Brunei Darussalam        | 842.11      | Cambodia    | 395.30      | Cambodia   | 332.11      | Madagascar | 440.96 |
| ASPR | Republic of Korea | 8997.39                  | United States of America | 7579.65                  | Republic of Korea | 10882.76                 | Burundi     | 5090.05     | Viet Nam    | 4438.64    | Burundi     | 5573.28    |        |
|      | Brunei Darussalam | 8815.59                  | Mexico                   | 7208.37                  | Singapore         | 10714.34                 | Cambodia    | 5073.17     | Tajikistan  | 4386.15    | Somalia     | 5518.11    |        |
|      | Singapore         | 8795.59                  | South Africa             | 7124.31                  | Brunei Darussalam | 10684.77                 | Madagascar  | 5050.98     | Cambodia    | 4323.07    | Madagascar  | 5450.60    |        |
| ASDR | Republic of Korea | 327.14                   | United States of America | 266.63                   | Republic of Korea | 402.58                   | Cambodia    | 172.45      | Tajikistan  | 151.40     | Somalia     | 187.63     |        |
|      | Singapore         | 323.81                   | Mexico                   | 254.51                   | Singapore         | 401.49                   | Madagascar  | 172.41      | Afghanistan | 148.08     | Madagascar  | 185.98     |        |
|      | Brunei Darussalam | 319.00                   | Russian Federation       | 250.45                   | Brunei Darussalam | 393.69                   | Afghanistan | 168.72      | Cambodia    | 146.80     | Afghanistan | 185.46     |        |

**Table S6. The DALYs and ASDR with their variations of osteoarthritis attributable to high BMI at the global, SDI quintile, and regional levels from 1990 to 2021**

| Characteristics            | DALYs                                 |                                        |                           | ASDR (per 100,000 population) |                         | EAPC (95%CI)        |
|----------------------------|---------------------------------------|----------------------------------------|---------------------------|-------------------------------|-------------------------|---------------------|
|                            | 1990                                  | 2021                                   | 1990-2021                 | 1990                          | 2021                    |                     |
|                            | Both (95%UI)                          | Both (95%UI)                           | Change (%)                | Both (95%UI)                  | Both (95%UI)            |                     |
| <b>Global</b>              | 1449681.33<br>(-127135.50-4113313.24) | 4422953.51<br>(-421237.19-12338124.92) | 205.10<br>(191.71-227.09) | 35.97<br>(-3.14-102.31)       | 50.59<br>(-4.81-141.35) | 1.17<br>(1.15-1.20) |
| <b>Sex</b>                 |                                       |                                        |                           |                               |                         |                     |
| Male                       | 521229.26<br>(-46292.23-1480937.59)   | 1644274.97<br>(-157014.66-4599839.39)  | 215.46<br>(200.51-236.92) | 27.30<br>(-2.40-77.90)        | 39.47<br>(-3.75-110.79) | 1.26<br>(1.24-1.28) |
| Female                     | 928452.07<br>(-80843.27-2633520.29)   | 2778678.54<br>(-264222.53-7738285.53)  | 199.28<br>(186.79-223.04) | 43.47<br>(-3.78-123.36)       | 60.74<br>(-5.78-169.14) | 1.16<br>(1.13-1.19) |
| <b>Types</b>               |                                       |                                        |                           |                               |                         |                     |
| Osteoarthritis knee        | 1306589.34<br>(-114326.79-3742191.00) | 4019554.91<br>(-382558.22-11222317.96) | 207.64<br>(194.14-229.71) | 32.35<br>(-2.81-92.95)        | 45.93<br>(-4.36-128.33) | 0.89<br>(0.86-0.91) |
| Osteoarthritis hip         | 143091.99<br>(-12808.72-386693.93)    | 403398.60<br>(-38678.96-1076491.22)    | 181.92<br>(169.20-204.89) | 3.63<br>(-0.32-9.81)          | 4.66<br>(-0.45-12.42)   | 1.21<br>(1.18-1.23) |
| <b>SDI</b>                 |                                       |                                        |                           |                               |                         |                     |
| High                       | 569083.03<br>(-52686.32-1575580.47)   | 1271056.92<br>(-127983.26-3441561.02)  | 123.35<br>(112.98-144.93) | 52.63<br>(-4.89-145.38)       | 66.70<br>(-6.82-179.94) | 0.71<br>(0.67-0.76) |
| High-middle                | 393635.12<br>(-35314.98-1102209.19)   | 1105143.77<br>(-108304.99-3016330.75)  | 180.75<br>(168.42-201.99) | 39.00<br>(-3.48-109.56)       | 55.85<br>(-5.46-152.49) | 1.26<br>(1.22-1.31) |
| Middle                     | 318093.44<br>(-26116.87-922529.50)    | 1364967.96<br>(-126086.15-3863690.88)  | 329.11<br>(302.47-367.69) | 28.73<br>(-2.33-83.68)        | 48.16<br>(-4.41-137.15) | 1.86<br>(1.79-1.92) |
| Low-middle                 | 125910.19<br>(-10241.84-369632.67)    | 527571.30<br>(-46776.09-1497615.07)    | 319.01<br>(295.13-355.24) | 19.32<br>(-1.55-57.41)        | 34.55<br>(-3.03-98.53)  | 2.02<br>(1.98-2.06) |
| Low                        | 41133.19<br>(-3041.86-123324.51)      | 150288.28<br>(-11967.92-440893.36)     | 265.37<br>(247.47-286.50) | 16.81<br>(-1.23-51.23)        | 26.73<br>(-2.09-79.82)  | 1.55<br>(1.51-1.59) |
| <b>Regions</b>             |                                       |                                        |                           |                               |                         |                     |
| Andean Latin America       | 9894.27<br>(-919.01-27077.60)         | 39752.31<br>(-4229.51-105662.70)       | 301.77<br>(273.28-349.71) | 46.29<br>(-4.26-127.24)       | 65.71<br>(-6.95-175.47) | 1.18<br>(1.14-1.21) |
| Australasia                | 13064.09<br>(-1250.84-35716.43)       | 39024.36<br>(-3963.41-105319.17)       | 198.71<br>(172.77-254.30) | 56.54<br>(-5.43-154.09)       | 79.24<br>(-8.19-213.40) | 1.10<br>(1.04-1.15) |
| Caribbean                  | 11257.85<br>(-978.89-31879.42)        | 32228.65<br>(-3203.64-86894.80)        | 186.28<br>(169.48-220.09) | 42.82<br>(-3.72-121.23)       | 59.71<br>(-5.93-160.98) | 1.14<br>(1.10-1.18) |
| Central Asia               | 16488.35<br>(-1541.00-45709.18)       | 36183.43<br>(-3859.63-97115.19)        | 119.45<br>(109.02-140.05) | 34.80<br>(-3.21-97.26)        | 42.04<br>(-4.37-113.44) | 0.62<br>(0.61-0.63) |
| Central Europe             | 63283.49<br>(-5875.68-172456.65)      | 107282.01<br>(-11052.48-289260.70)     | 69.53<br>(62.33-86.32)    | 42.05<br>(-3.89-114.92)       | 51.25<br>(-5.32-138.21) | 0.66<br>(0.64-0.67) |
| Central Latin America      | 44279.16<br>(-4269.90-121092.83)      | 174200.55<br>(-18965.68-458370.89)     | 293.41<br>(269.72-341.58) | 50.85<br>(-4.85-139.84)       | 67.69<br>(-7.32-178.75) | 0.91<br>(0.90-0.93) |
| Central Sub-Saharan Africa | 4802.48<br>(-338.39-14209.67)         | 21121.49<br>(-1648.84-62061.11)        | 339.80<br>(294.33-391.70) | 19.60<br>(-1.37-58.77)        | 34.18<br>(-2.59-101.87) | 1.78<br>(1.73-1.83) |

|                              |                                    |                                       |                           |                         |                         |                     |
|------------------------------|------------------------------------|---------------------------------------|---------------------------|-------------------------|-------------------------|---------------------|
| East Asia                    | 256084.43<br>(-20939.60-755795.37) | 1201663.79<br>(-108094.93-3403964.66) | 369.25<br>(326.96-420.35) | 27.46<br>(-2.23-81.48)  | 52.85<br>(-4.73-150.44) | 2.47<br>(2.33-2.60) |
| Eastern Europe               | 120261.52<br>(-11249.12-330991.37) | 189331.51<br>(-19437.22-497720.31)    | 57.43<br>(48.11-78.67)    | 42.78<br>(-3.96-118.19) | 54.95<br>(-5.69-144.57) | 0.88<br>(0.85-0.90) |
| Eastern Sub-Saharan Africa   | 14443.59<br>(-1065.74-43728.94)    | 54046.78<br>(-4255.87-157360.22)      | 274.19<br>(254.09-300.65) | 17.90<br>(-1.31-54.97)  | 28.76<br>(-2.22-84.57)  | 1.56<br>(1.53-1.58) |
| High-income Asia Pacific     | 82638.80<br>(-6623.01-243996.36)   | 201743.24<br>(-15797.04-603491.75)    | 144.13<br>(127.78-163.48) | 39.93<br>(-3.20-117.82) | 51.50<br>(-4.14-153.08) | 0.86<br>(0.84-0.87) |
| High-income North America    | 223661.45<br>(-22013.42-599742.69) | 501346.75<br>(-55304.04-1308805.36)   | 124.15<br>(108.50-158.65) | 67.01<br>(-6.64-178.76) | 82.03<br>(-9.14-215.01) | 0.47<br>(0.31-0.62) |
| North Africa and Middle East | 72032.85<br>(-6988.65-198284.45)   | 296602.76<br>(-34260.25-774588.43)    | 311.76<br>(278.37-390.37) | 40.23<br>(-3.83-111.53) | 59.76<br>(-6.78-155.92) | 1.28<br>(1.27-1.29) |
| Oceania                      | 1315.02<br>(-122.57-3651.54)       | 4313.51<br>(-449.91-11532.70)         | 228.02<br>(212.02-256.19) | 38.94<br>(-3.57-109.06) | 48.86<br>(-4.96-132.98) | 1.28<br>(1.27-1.29) |
| South Asia                   | 84239.63<br>(-6104.07-248489.16)   | 439406.19<br>(-35032.98-1289375.79)   | 421.61<br>(371.26-486.22) | 13.18<br>(-0.94-39.29)  | 27.81<br>(-2.20-81.78)  | 0.69<br>(0.63-0.76) |
| Southeast Asia               | 41752.59<br>(-3098.97-125493.00)   | 201324.62<br>(-15981.22-582465.03)    | 382.18<br>(352.39-424.84) | 14.76<br>(-1.09-44.76)  | 27.87<br>(-2.18-80.99)  | 2.65<br>(2.58-2.73) |
| Southern Latin America       | 26719.70<br>(-2619.98-71378.73)    | 64937.71<br>(-7109.23-167296.89)      | 143.03<br>(127.97-174.15) | 57.23<br>(-5.61-153.03) | 76.31<br>(-8.39-196.56) | 2.65<br>(2.58-2.73) |
| Southern Sub-Saharan Africa  | 12078.61<br>(-1082.54-33236.08)    | 36137.02<br>(-3684.36-95528.35)       | 199.18<br>(181.15-238.51) | 43.15<br>(-3.83-120.08) | 59.34<br>(-5.99-158.72) | 2.19<br>(2.13-2.26) |
| Tropical Latin America       | 43719.28<br>(-3904.63-120749.45)   | 165101.25<br>(-16732.60-441786.37)    | 277.64<br>(254.99-318.36) | 45.65<br>(-4.02-126.66) | 62.95<br>(-6.35-168.57) | 0.94<br>(0.88-1.00) |
| Western Europe               | 282127.82<br>(-25876.85-786737.66) | 525194.69<br>(-51633.50-1415589.91)   | 86.15<br>(78.25-101.81)   | 50.71<br>(-4.69-140.96) | 62.95<br>(-6.27-168.56) | 1.05<br>(1.03-1.06) |
| Western Sub-Saharan Africa   | 25536.36<br>(-2047.47-75155.69)    | 92010.89<br>(-8076.14-256558.55)      | 260.31<br>(238.07-296.41) | 27.47<br>(-2.18-81.74)  | 42.20<br>(-3.60-119.63) | 1.07<br>(1.04-1.09) |

**Table S7. The DALYs and ASDR with their variations of osteoarthritis attributable to high BMI at the national level from 1990 to 2021**

| Characteristics     | DALYs                           |                                  |                           | ASDR (per 100,000 population) |                          | EAPC (95%CI)        |
|---------------------|---------------------------------|----------------------------------|---------------------------|-------------------------------|--------------------------|---------------------|
|                     | 1990                            | 2021                             | 1990-2021                 | 1990                          | 2021                     |                     |
|                     | Both (95%UI)                    | Both (95%UI)                     | Change (%)                | Both (95%UI)                  | Both (95%UI)             |                     |
| Afghanistan         | 2130.97<br>(-175.10-6095.98)    | 4455.34<br>(-394.96-12279.37)    | 109.08<br>(91.98-135.95)  | 28.75<br>(-2.32-82.59)        | 39.15<br>(-3.34-111.00)  | 1.10<br>(1.03-1.16) |
| Albania             | 816.02<br>(-79.36-2138.48)      | 2048.70<br>(-217.09-5398.69)     | 151.06<br>(133.22-181.64) | 38.43<br>(-3.73-101.45)       | 47.70<br>(-5.08-125.80)  | 0.73<br>(0.72-0.74) |
| Algeria             | 4566.00<br>(-412.15-13037.46)   | 21403.58<br>(-2342.76-56691.44)  | 368.76<br>(323.85-468.89) | 35.21<br>(-3.15-100.90)       | 55.71<br>(-6.01-148.01)  | 1.52<br>(1.49-1.54) |
| American Samoa      | 18.09<br>(-2.16-45.73)          | 44.49<br>(-5.56-110.14)          | 145.97<br>(130.84-181.13) | 70.29<br>(-8.10-180.51)       | 83.99<br>(-10.25-210.46) | 0.51<br>(0.42-0.60) |
| Andorra             | 28.74<br>(-2.79-79.59)          | 92.04<br>(-8.51-248.05)          | 220.25<br>(199.62-252.18) | 49.02<br>(-4.76-135.75)       | 60.38<br>(-5.57-162.63)  | 0.70<br>(0.69-0.71) |
| Angola              | 800.45<br>(-61.27-2336.73)      | 4461.97<br>(-350.93-12872.60)    | 457.44<br>(400.01-540.63) | 18.04<br>(-1.36-53.49)        | 32.43<br>(-2.46-95.66)   | 1.89<br>(1.85-1.94) |
| Antigua and Barbuda | 23.72<br>(-2.25-67.41)          | 71.60<br>(-7.78-189.02)          | 201.83<br>(174.34-252.96) | 47.37<br>(-4.60-132.73)       | 63.63<br>(-6.83-168.87)  | 0.97<br>(0.96-0.98) |
| Argentina           | 18350.55<br>(-1765.46-49359.32) | 41045.05<br>(-4484.65-106300.00) | 123.67<br>(107.90-157.17) | 56.27<br>(-5.42-151.52)       | 75.07<br>(-8.23-193.87)  | 0.95<br>(0.90-1.01) |
| Armenia             | 987.65<br>(-96.70-2701.69)      | 1847.18<br>(-195.30-4961.90)     | 87.03<br>(73.54-107.20)   | 35.19<br>(-3.39-96.97)        | 42.95<br>(-4.55-115.55)  | 0.68<br>(0.66-0.70) |
| Australia           | 10901.18<br>(-1045.32-29843.17) | 33151.02<br>(-3319.87-88946.40)  | 204.10<br>(175.56-267.04) | 56.56<br>(-5.43-154.34)       | 80.28<br>(-8.21-214.46)  | 1.13<br>(1.07-1.19) |
| Austria             | 5648.57<br>(-489.96-15739.02)   | 10064.51<br>(-919.72-27954.21)   | 78.18<br>(66.71-97.29)    | 49.91<br>(-4.39-137.30)       | 60.54<br>(-5.61-166.71)  | 0.60<br>(0.59-0.61) |
| Azerbaijan          | 1793.79<br>(-161.98-4903.66)    | 4876.06<br>(-515.87-12868.82)    | 171.83<br>(153.12-209.77) | 34.99<br>(-3.08-95.83)        | 43.98<br>(-4.48-117.43)  | 0.80<br>(0.77-0.82) |
| Bahamas             | 87.62<br>(-8.05-240.61)         | 308.57<br>(-34.42-798.63)        | 252.16<br>(220.90-312.95) | 54.78<br>(-4.98-151.63)       | 70.88<br>(-7.75-185.39)  | 0.84<br>(0.80-0.87) |
| Bahrain             | 99.48<br>(-9.83-267.65)         | 823.85<br>(-103.79-2093.89)      | 728.12<br>(644.93-939.90) | 46.57<br>(-4.48-126.42)       | 66.16<br>(-8.00-168.90)  | 1.14<br>(1.13-1.15) |
| Bangladesh          | 5110.29<br>(-377.68-14944.75)   | 34855.05<br>(-2721.73-102652.61) | 582.06<br>(483.93-700.58) | 10.05<br>(-0.74-29.48)        | 23.64<br>(-1.84-70.03)   | 3.11<br>(2.99-3.23) |
| Barbados            | 146.62<br>(-13.90-412.30)       | 359.60<br>(-36.11-935.65)        | 145.26<br>(125.12-184.24) | 55.40<br>(-5.48-153.48)       | 71.79<br>(-7.23-187.12)  | 0.82<br>(0.79-0.86) |
| Belarus             | 5541.31<br>(-519.62-15528.75)   | 8698.02<br>(-958.86-22790.91)    | 56.97<br>(46.01-80.96)    | 42.48<br>(-3.98-119.17)       | 55.08<br>(-6.08-144.34)  | 0.89<br>(0.87-0.90) |
| Belgium             | 6772.31<br>(-568.01-19070.58)   | 12498.05<br>(-1195.18-34371.14)  | 84.55<br>(72.63-108.06)   | 45.89<br>(-3.83-128.60)       | 59.61<br>(-5.75-162.85)  | 0.81<br>(0.77-0.85) |
| Belize              | 51.77<br>(-4.93-142.85)         | 232.80<br>(-24.29-615.75)        | 349.69<br>(314.22-417.13) | 55.50<br>(-5.28-152.92)       | 72.78<br>(-7.52-194.91)  | 0.86<br>(0.77-0.95) |
| Benin               | 636.98<br>(-52.15-1817.05)      | 2538.22<br>(-211.39-7154.53)     | 298.48<br>(263.34-341.87) | 30.78<br>(-2.51-88.62)        | 44.09<br>(-3.59-126.02)  | 1.14<br>(1.11-1.16) |
| Bermuda             | 39.55<br>(-3.73-106.09)         | 99.49<br>(-11.61-260.34)         | 151.55<br>(130.12-197.76) | 62.21<br>(-5.84-167.13)       | 78.82<br>(-9.26-205.74)  | 0.77<br>(0.73-0.80) |



|                                     |                                    |                                       |                           |                         |                          |                     |
|-------------------------------------|------------------------------------|---------------------------------------|---------------------------|-------------------------|--------------------------|---------------------|
| Bhutan                              | 84.96<br>(-7.58-235.01)            | 286.03<br>(-26.00-786.12)             | 236.66<br>(208.18-282.80) | 30.31<br>(-2.69-85.60)  | 44.53<br>(-4.03-122.85)  | 1.34<br>(1.29-1.38) |
| Bolivia<br>(Plurinational State of) | 1392.69<br>(-120.79-3877.32)       | 5819.50<br>(-593.58-15670.71)         | 317.86<br>(282.04-378.71) | 40.96<br>(-3.51-114.61) | 60.37<br>(-6.07-164.22)  | 1.27<br>(1.23-1.32) |
| Bosnia and Herzegovina              | 1619.57<br>(-156.23-4438.67)       | 2850.34<br>(-302.98-7721.51)          | 75.99<br>(64.30-99.02)    | 37.26<br>(-3.46-103.19) | 47.54<br>(-5.03-128.52)  | 0.79<br>(0.73-0.86) |
| Botswana                            | 173.61<br>(-13.93-467.33)          | 832.07<br>(-69.66-2388.38)            | 379.26<br>(329.42-470.16) | 29.44<br>(-2.33-79.57)  | 51.80<br>(-4.23-148.70)  | 1.82<br>(1.80-1.84) |
| Brazil                              | 42617.54<br>(-3797.36-117709.26)   | 161305.28<br>(-16311.35-431405.06)    | 278.50<br>(255.70-319.57) | 45.58<br>(-4.00-126.48) | 62.95<br>(-6.34-168.46)  | 1.07<br>(1.05-1.09) |
| Brunei Darussalam                   | 47.79<br>(-3.86-140.91)            | 274.28<br>(-25.24-773.32)             | 473.95<br>(410.19-562.16) | 40.74<br>(-3.23-120.36) | 66.30<br>(-5.99-188.80)  | 1.64<br>(1.53-1.75) |
| Bulgaria                            | 5463.24<br>(-533.00-15202.45)      | 6689.54<br>(-666.85-18390.73)         | 22.45<br>(14.52-36.43)    | 43.71<br>(-4.26-121.77) | 49.99<br>(-4.98-136.50)  | 0.43<br>(0.41-0.44) |
| Burkina Faso                        | 766.06<br>(-65.66-2259.30)         | 2453.58<br>(-197.56-7176.78)          | 220.28<br>(182.25-271.56) | 16.33<br>(-1.38-48.33)  | 23.64<br>(-1.89-70.56)   | 1.22<br>(1.18-1.26) |
| Burundi                             | 324.65<br>(-22.88-1011.01)         | 1005.15<br>(-74.02-3093.63)           | 209.61<br>(167.62-254.19) | 13.51<br>(-0.94-42.35)  | 18.51<br>(-1.33-56.98)   | 0.97<br>(0.90-1.05) |
| Cabo Verde                          | 66.37<br>(-5.29-199.93)            | 230.89<br>(-21.53-647.25)             | 247.87<br>(215.88-306.99) | 30.94<br>(-2.49-92.56)  | 48.91<br>(-4.45-138.09)  | 1.49<br>(1.48-1.50) |
| Cambodia                            | 622.91<br>(-48.01-1834.85)         | 2703.40<br>(-205.30-8050.53)          | 334.00<br>(278.58-410.88) | 12.38<br>(-0.95-37.11)  | 19.50<br>(-1.47-58.49)   | 1.55<br>(1.51-1.58) |
| Cameroon                            | 2035.92<br>(-175.95-5695.76)       | 8155.30<br>(-870.37-21657.45)         | 300.57<br>(268.91-355.68) | 42.23<br>(-3.60-119.26) | 58.54<br>(-6.13-157.26)  | 1.03<br>(1.02-1.04) |
| Canada                              | 11096.33<br>(-1066.23-30208.48)    | 30261.11<br>(-2877.28-81528.45)       | 172.71<br>(154.86-203.77) | 34.76<br>(-3.34-94.52)  | 45.56<br>(-4.41-122.58)  | 0.69<br>(0.59-0.78) |
| Central African Republic            | 209.55<br>(-15.02-644.48)          | 719.38<br>(-55.25-2019.96)            | 243.30<br>(202.22-303.30) | 16.30<br>(-1.15-50.78)  | 27.43<br>(-2.02-78.12)   | 1.73<br>(1.69-1.77) |
| Chad                                | 622.88<br>(-47.20-1939.39)         | 1786.01<br>(-139.38-5064.02)          | 186.73<br>(153.29-226.08) | 21.71<br>(-1.63-67.40)  | 28.09<br>(-2.17-81.05)   | 0.79<br>(0.76-0.82) |
| Chile                               | 6252.51<br>(-653.28-16742.02)      | 20214.92<br>(-2263.82-52058.97)       | 223.31<br>(201.85-266.44) | 60.83<br>(-6.32-163.66) | 79.70<br>(-8.95-205.68)  | 0.85<br>(0.79-0.91) |
| China                               | 246468.73<br>(-20130.69-727780.59) | 1164587.77<br>(-104718.16-3297087.97) | 372.51<br>(329.77-424.77) | 27.43<br>(-2.22-81.50)  | 52.98<br>(-4.73-150.74)  | 2.48<br>(2.35-2.62) |
| Colombia                            | 8087.35<br>(-713.27-22436.22)      | 34990.95<br>(-3654.66-94028.77)       | 332.66<br>(295.84-397.15) | 43.80<br>(-3.85-123.62) | 63.05<br>(-6.56-169.44)  | 1.20<br>(1.17-1.23) |
| Comoros                             | 43.97<br>(-3.33-135.14)            | 195.33<br>(-15.89-555.05)             | 344.25<br>(300.44-407.23) | 20.83<br>(-1.57-63.68)  | 37.00<br>(-2.97-106.18)  | 1.92<br>(1.91-1.93) |
| Congo                               | 297.20<br>(-24.33-847.02)          | 1315.71<br>(-120.01-3632.51)          | 342.71<br>(294.79-411.34) | 25.50<br>(-2.10-73.22)  | 41.40<br>(-3.63-117.31)  | 1.55<br>(1.51-1.59) |
| Cook Islands                        | 9.07<br>(-1.02-23.54)              | 21.71<br>(-2.62-55.96)                | 139.41<br>(124.31-169.36) | 66.95<br>(-7.44-175.27) | 85.01<br>(-10.32-217.46) | 0.74<br>(0.68-0.79) |
| Costa Rica                          | 898.23<br>(-91.24-2438.20)         | 3684.06<br>(-400.15-9925.72)          | 310.15<br>(280.43-368.33) | 50.40<br>(-5.08-137.17) | 66.54<br>(-7.21-179.25)  | 0.90<br>(0.88-0.92) |
| Croatia                             | 2624.61<br>(-257.68-7262.21)       | 4287.85<br>(-448.43-11668.27)         | 63.37<br>(50.90-85.22)    | 41.81<br>(-4.04-116.41) | 52.32<br>(-5.61-140.02)  | 0.77<br>(0.74-0.81) |
| Cuba                                | 4340.16<br>(-355.98-12451.86)      | 11857.98<br>(-1168.99-31969.75)       | 173.22<br>(149.27-221.29) | 42.50<br>(-3.49-121.84) | 62.33<br>(-6.20-167.36)  | 1.30<br>(1.27-1.33) |

|                                          |                                  |                                    |                           |                         |                         |                     |
|------------------------------------------|----------------------------------|------------------------------------|---------------------------|-------------------------|-------------------------|---------------------|
| Cyprus                                   | 345.15<br>(-28.33-994.21)        | 1206.38<br>(-120.98-3228.09)       | 249.52<br>(216.51-306.23) | 41.27<br>(-3.39-118.88) | 59.55<br>(-6.00-158.63) | 1.21<br>(1.15-1.28) |
| Czechia                                  | 6166.32<br>(-624.68-16537.97)    | 10509.36<br>(-1162.29-27925.26)    | 70.43<br>(60.63-85.13)    | 45.53<br>(-4.59-122.42) | 52.78<br>(-5.86-138.17) | 0.48<br>(0.48-0.49) |
| Côte d'Ivoire                            | 1403.96<br>(-112.47-4093.61)     | 5695.70<br>(-486.80-15685.65)      | 305.69<br>(266.84-366.83) | 30.17<br>(-2.34-88.29)  | 43.97<br>(-3.65-124.77) | 1.19<br>(1.17-1.21) |
| Democratic People's<br>Republic of Korea | 3598.64<br>(-327.75-10376.05)    | 11443.01<br>(-969.26-33123.88)     | 217.98<br>(180.40-275.07) | 21.00<br>(-1.89-60.84)  | 34.10<br>(-2.87-97.96)  | 1.57<br>(1.45-1.68) |
| Democratic Republic of<br>the Congo      | 3224.38<br>(-217.75-9509.15)     | 13675.70<br>(-1036.38-40873.89)    | 324.13<br>(265.67-390.96) | 19.07<br>(-1.28-55.84)  | 33.68<br>(-2.48-101.31) | 1.81<br>(1.75-1.87) |
| Denmark                                  | 3551.56<br>(-313.91-10223.25)    | 6158.58<br>(-587.10-16717.91)      | 73.41<br>(62.07-92.69)    | 46.68<br>(-4.19-132.67) | 57.36<br>(-5.63-155.08) | 0.66<br>(0.61-0.71) |
| Djibouti                                 | 22.41<br>(-1.81-66.16)           | 174.40<br>(-13.07-495.40)          | 678.19<br>(576.17-789.97) | 14.02<br>(-1.10-42.21)  | 22.69<br>(-1.68-66.74)  | 1.58<br>(1.53-1.62) |
| Dominica                                 | 33.44<br>(-3.27-90.04)           | 62.40<br>(-7.17-162.58)            | 86.61<br>(73.54-117.24)   | 58.34<br>(-5.75-156.47) | 72.75<br>(-8.32-189.65) | 0.70<br>(0.66-0.73) |
| Dominican Republic                       | 1501.28<br>(-127.48-4154.82)     | 5943.22<br>(-590.64-16273.07)      | 295.88<br>(258.50-352.97) | 38.44<br>(-3.21-107.11) | 58.17<br>(-5.73-160.05) | 1.39<br>(1.34-1.43) |
| Ecuador                                  | 2804.11<br>(-261.19-7576.53)     | 12239.85<br>(-1272.66-32470.72)    | 336.50<br>(291.30-414.93) | 50.72<br>(-4.67-138.79) | 73.47<br>(-7.62-195.72) | 1.28<br>(1.24-1.33) |
| Egypt                                    | 13974.36<br>(-1419.18-37971.71)  | 47765.56<br>(-6009.90-121024.94)   | 241.81<br>(208.43-332.62) | 47.10<br>(-4.62-129.32) | 67.35<br>(-8.29-172.27) | 1.11<br>(1.07-1.14) |
| El Salvador                              | 1577.01<br>(-162.71-4342.47)     | 4239.49<br>(-459.75-10952.02)      | 168.83<br>(148.79-208.36) | 52.26<br>(-5.36-145.11) | 69.84<br>(-7.60-180.14) | 0.93<br>(0.88-0.99) |
| Equatorial Guinea                        | 54.96<br>(-4.16-160.43)          | 289.56<br>(-26.75-789.83)          | 426.90<br>(363.01-543.43) | 25.75<br>(-1.96-75.18)  | 50.28<br>(-4.48-139.69) | 2.31<br>(2.24-2.37) |
| Eritrea                                  | 141.38<br>(-11.49-412.64)        | 599.43<br>(-43.89-1798.42)         | 323.97<br>(253.39-416.04) | 10.79<br>(-0.84-31.51)  | 18.76<br>(-1.35-56.47)  | 1.78<br>(1.75-1.81) |
| Estonia                                  | 941.92<br>(-84.66-2526.74)       | 1356.72<br>(-142.89-3600.66)       | 44.04<br>(34.25-60.70)    | 46.05<br>(-4.16-123.42) | 55.89<br>(-6.02-147.38) | 0.72<br>(0.69-0.75) |
| Eswatini                                 | 140.45<br>(-14.24-380.49)        | 388.11<br>(-40.20-1008.45)         | 176.32<br>(153.44-218.23) | 46.48<br>(-4.69-127.67) | 65.28<br>(-6.68-169.74) | 1.04<br>(0.95-1.14) |
| Ethiopia                                 | 3241.69<br>(-238.30-9621.20)     | 9987.09<br>(-774.84-29511.69)      | 208.08<br>(178.00-245.08) | 14.94<br>(-1.11-45.08)  | 21.15<br>(-1.61-63.32)  | 1.13<br>(1.10-1.16) |
| Fiji                                     | 223.06<br>(-21.77-596.75)        | 629.68<br>(-74.45-1584.39)         | 182.29<br>(155.48-236.40) | 54.46<br>(-5.26-148.90) | 74.50<br>(-8.65-189.48) | 0.96<br>(0.90-1.01) |
| Finland                                  | 3566.32<br>(-332.00-9885.91)     | 7066.30<br>(-724.97-19261.68)      | 98.14<br>(84.77-123.35)   | 51.25<br>(-4.82-141.66) | 63.59<br>(-6.57-172.60) | 0.68<br>(0.64-0.73) |
| France                                   | 34060.87<br>(-3002.03-98797.02)  | 73067.40<br>(-6486.90-204628.11)   | 114.52<br>(96.80-143.16)  | 43.19<br>(-3.86-125.30) | 59.21<br>(-5.26-165.04) | 1.02(0.92-1.11)     |
| Gabon                                    | 215.95<br>(-19.32-604.40)        | 659.17<br>(-68.30-1786.17)         | 205.24<br>(175.69-259.09) | 36.79<br>(-3.26-103.69) | 56.90<br>(-5.79-154.64) | 1.38<br>(1.35-1.41) |
| Gambia                                   | 116.93<br>(-9.61-336.43)         | 460.72<br>(-41.76-1280.20)         | 294.02<br>(259.64-358.91) | 30.59<br>(-2.49-89.09)  | 43.38<br>(-3.82-122.30) | 1.12<br>(1.09-1.15) |
| Georgia                                  | 2314.33<br>(-212.96-6369.97)     | 2353.55<br>(-233.46-6385.25)       | 1.69<br>(-4.23-12.39)     | 36.60<br>(-3.34-101.44) | 40.88<br>(-4.10-110.15) | 0.38<br>(0.38-0.39) |
| Germany                                  | 67186.38<br>(-6235.22-183691.32) | 109573.52<br>(-10844.68-294559.90) | 63.09<br>(53.86-80.06)    | 54.97<br>(-5.11-149.70) | 63.62<br>(-6.44-168.74) | 0.45<br>(0.43-0.47) |

|                               |                                  |                                     |                           |                         |                         |                     |
|-------------------------------|----------------------------------|-------------------------------------|---------------------------|-------------------------|-------------------------|---------------------|
| Ghana                         | 1727.63<br>(-133.60-5091.80)     | 8475.92<br>(-714.44-23455.97)       | 390.61<br>(342.70-468.71) | 24.91<br>(-1.89-75.52)  | 45.57<br>(-3.71-130.41) | 1.94<br>(1.92-1.96) |
| Greece                        | 7469.44<br>(-702.05-20511.07)    | 13489.85<br>(-1356.99-36878.30)     | 80.60<br>(67.08-104.25)   | 49.86<br>(-4.70-136.70) | 65.08<br>(-6.58-177.53) | 0.93<br>(0.86-1.00) |
| Greenland                     | 14.46<br>(-1.43-39.24)           | 35.41<br>(-3.57-94.08)              | 144.95<br>(127.74-173.86) | 39.05<br>(-3.78-105.95) | 47.94<br>(-4.75-129.31) | 0.68<br>(0.65-0.71) |
| Grenada                       | 28.35<br>(-2.50-81.21)           | 72.85<br>(-7.60-197.96)             | 156.97<br>(134.24-201.28) | 43.27<br>(-3.90-122.69) | 60.40<br>(-6.19-165.16) | 1.09<br>(1.05-1.13) |
| Guam                          | 50.52<br>(-5.29-134.04)          | 151.86<br>(-16.80-403.30)           | 200.57<br>(179.75-234.57) | 57.94<br>(-5.96-156.71) | 72.22<br>(-7.98-191.31) | 0.71<br>(0.68-0.74) |
| Guatemala                     | 1680.72<br>(-148.07-4697.67)     | 6912.30<br>(-693.55-18517.00)       | 311.27<br>(278.78-372.87) | 45.02<br>(-3.92-126.72) | 60.69<br>(-6.05-162.31) | 0.98<br>(0.97-0.99) |
| Guinea                        | 840.87<br>(-66.52-2483.45)       | 2072.23<br>(-166.92-5992.87)        | 146.44<br>(120.22-175.79) | 24.48<br>(-1.92-72.81)  | 34.20<br>(-2.73-99.54)  | 1.04<br>(1.01-1.08) |
| Guinea-Bissau                 | 107.69<br>(-8.54-307.15)         | 301.38<br>(-25.19-864.50)           | 179.86<br>(154.38-215.89) | 25.23<br>(-2.03-73.51)  | 36.40<br>(-2.97-105.53) | 1.15<br>(1.14-1.17) |
| Guyana                        | 169.08<br>(-14.70-474.46)        | 393.33<br>(-38.34-1082.97)          | 132.63<br>(112.36-167.00) | 42.33<br>(-3.66-120.27) | 57.37<br>(-5.49-159.18) | 1.00<br>(0.98-1.03) |
| Haiti                         | 670.34<br>(-49.89-2045.14)       | 2574.99<br>(-205.87-7301.77)        | 284.13<br>(242.94-338.77) | 19.11<br>(-1.42-58.16)  | 31.49<br>(-2.49-91.11)  | 1.74<br>(1.70-1.78) |
| Honduras                      | 940.91<br>(-84.10-2576.88)       | 3940.95<br>(-430.07-10313.57)       | 318.84<br>(287.87-369.48) | 44.28<br>(-3.94-122.24) | 58.89<br>(-6.42-155.85) | 0.93<br>(0.90-0.96) |
| Hungary                       | 6691.85<br>(-597.38-18415.16)    | 9919.59<br>(-982.85-26877.07)       | 48.23<br>(38.68-67.13)    | 46.03<br>(-4.11-126.47) | 54.72<br>(-5.54-147.36) | 0.57<br>(0.56-0.59) |
| Iceland                       | 157.59<br>(-15.34-427.11)        | 371.74<br>(-36.76-994.88)           | 135.89<br>(121.34-162.63) | 57.55<br>(-5.65-155.35) | 68.50<br>(-6.85-182.32) | 0.56<br>(0.54-0.57) |
| India                         | 66788.91<br>(-4738.25-196448.68) | 351585.14<br>(-27811.55-1028334.05) | 426.41<br>(370.55-507.24) | 12.90<br>(-0.90-38.29)  | 27.77<br>(-2.18-81.20)  | 2.70<br>(2.63-2.78) |
| Indonesia                     | 14453.03<br>(-1078.20-42333.63)  | 71651.20<br>(-5645.01-207717.66)    | 395.75<br>(347.08-465.66) | 12.88<br>(-0.95-38.26)  | 25.45<br>(-1.98-74.36)  | 2.39<br>(2.30-2.47) |
| Iran<br>(Islamic Republic of) | 9277.80<br>(-800.77-26415.59)    | 44994.39<br>(-4873.25-118696.41)    | 384.97<br>(332.74-515.68) | 32.77<br>(-2.78-93.99)  | 54.30<br>(-5.79-143.61) | 1.61<br>(1.58-1.63) |
| Iraq                          | 4026.63<br>(-390.44-10600.59)    | 15479.54<br>(-1696.58-40324.74)     | 284.43<br>(253.46-357.97) | 49.30<br>(-4.72-131.08) | 58.31<br>(-6.36-152.34) | 0.57<br>(0.55-0.59) |
| Ireland                       | 1989.02<br>(-178.37-5553.40)     | 4873.71<br>(-495.85-12916.40)       | 145.03<br>(127.14-176.14) | 50.23<br>(-4.61-139.22) | 64.47<br>(-6.64-169.89) | 0.81<br>(0.77-0.85) |
| Israel                        | 2467.49<br>(-237.83-6737.57)     | 7376.17<br>(-704.26-20371.93)       | 198.93<br>(180.13-232.19) | 51.92<br>(-5.06-141.36) | 63.08<br>(-6.06-173.03) | 0.58<br>(0.54-0.62) |
| Italy                         | 39993.62<br>(-3385.64-113457.83) | 74183.83<br>(-7012.06-204643.56)    | 85.49<br>(75.43-102.82)   | 46.14<br>(-3.94-129.82) | 57.51<br>(-5.50-157.29) | 0.66<br>(0.64-0.69) |
| Jamaica                       | 806.90<br>(-76.24-2310.07)       | 2039.12<br>(-210.50-5382.15)        | 152.71<br>(131.72-196.70) | 47.40<br>(-4.51-135.47) | 65.95<br>(-6.80-174.11) | 1.14<br>(1.09-1.20) |
| Japan                         | 69247.95<br>(-5508.99-205780.42) | 140243.81<br>(-10911.39-420874.53)  | 102.52<br>(88.69-119.69)  | 40.07<br>(-3.19-119.22) | 48.13<br>(-3.85-141.87) | 0.56<br>(0.53-0.58) |
| Jordan                        | 737.58<br>(-77.15-1914.16)       | 5870.27<br>(-742.00-14855.33)       | 695.89<br>(628.63-849.22) | 50.17<br>(-5.08-132.35) | 68.73<br>(-8.54-176.06) | 1.04<br>(1.01-1.06) |
| Kazakhstan                    | 4613.43<br>(-419.80-12614.50)    | 8279.27<br>(-844.80-22480.99)       | 79.46<br>(67.58-103.60)   | 36.00<br>(-3.26-99.29)  | 44.44<br>(-4.48-120.90) | 0.67<br>(0.66-0.69) |

|                                  |                                 |                                   |                           |                         |                         |                     |
|----------------------------------|---------------------------------|-----------------------------------|---------------------------|-------------------------|-------------------------|---------------------|
| Kenya                            | 1848.34<br>(-144.22-5289.00)    | 9189.21<br>(-766.43-26159.07)     | 397.16<br>(360.50-459.01) | 20.91<br>(-1.61-60.86)  | 35.74<br>(-2.93-102.81) | 1.75<br>(1.70-1.80) |
| Kiribati                         | 21.29<br>(-2.22-57.53)          | 56.77<br>(-6.95-145.11)           | 166.60<br>(146.65-208.32) | 51.89<br>(-5.28-142.78) | 68.47<br>(-8.05-177.75) | 0.84<br>(0.76-0.93) |
| Kuwait                           | 386.13<br>(-42.73-989.86)       | 2830.36<br>(-371.53-6847.76)      | 633.01<br>(556.27-810.07) | 52.24<br>(-5.67-137.15) | 74.24<br>(-9.46-184.77) | 1.20<br>(1.18-1.22) |
| Kyrgyzstan                       | 1025.41<br>(-92.43-2812.92)     | 2123.72<br>(-227.50-5639.90)      | 107.11<br>(92.49-135.41)  | 34.23<br>(-3.04-93.87)  | 41.48<br>(-4.31-110.75) | 0.61<br>(0.59-0.63) |
| Lao People's Democratic Republic | 299.64<br>(-21.14-902.22)       | 1286.48<br>(-89.08-3745.31)       | 329.35<br>(263.48-399.69) | 13.38<br>(-0.94-40.79)  | 24.23<br>(-1.67-71.27)  | 2.16<br>(2.07-2.26) |
| Latvia                           | 1694.32<br>(-176.99-4549.63)    | 2044.63<br>(-226.70-5545.45)      | 20.68<br>(13.81-34.19)    | 47.38<br>(-4.94-126.80) | 56.27<br>(-6.27-152.31) | 0.59<br>(0.57-0.61) |
| Lebanon                          | 1003.44<br>(-99.03-2727.85)     | 3585.39<br>(-413.19-9199.43)      | 257.31<br>(230.78-327.76) | 43.92<br>(-4.30-120.46) | 61.49<br>(-7.18-157.29) | 1.07<br>(0.99-1.14) |
| Lesotho                          | 319.31<br>(-29.23-857.18)       | 571.07<br>(-56.50-1523.43)        | 78.84<br>(64.51-104.41)   | 36.72<br>(-3.32-99.58)  | 50.60<br>(-4.95-136.85) | 1.03<br>(1.01-1.05) |
| Liberia                          | 441.58<br>(-37.04-1249.78)      | 1291.51<br>(-126.82-3539.51)      | 192.48<br>(165.26-237.53) | 36.97<br>(-3.09-103.82) | 52.04<br>(-4.97-144.81) | 1.19<br>(1.14-1.23) |
| Libya                            | 885.89<br>(-85.07-2422.97)      | 3897.32<br>(-487.31-9846.32)      | 339.93<br>(289.47-462.04) | 44.49<br>(-4.18-123.61) | 65.47<br>(-8.01-166.44) | 1.27<br>(1.24-1.30) |
| Lithuania                        | 1996.11<br>(-188.78-5503.65)    | 2924.34<br>(-299.73-7660.30)      | 46.50<br>(36.44-64.55)    | 44.16<br>(-4.14-121.81) | 54.96<br>(-5.79-142.71) | 0.72<br>(0.69-0.76) |
| Luxembourg                       | 269.80<br>(-22.63-758.30)       | 638.55<br>(-59.49-1734.40)        | 136.68<br>(121.23-165.62) | 50.36<br>(-4.27-141.41) | 62.63<br>(-5.85-169.86) | 0.69<br>(0.66-0.72) |
| Madagascar                       | 787.55<br>(-52.91-2468.68)      | 3127.41<br>(-230.36-8970.78)      | 297.11<br>(242.29-371.16) | 14.89<br>(-0.99-46.37)  | 24.76<br>(-1.78-70.40)  | 1.66<br>(1.60-1.72) |
| Malawi                           | 742.51<br>(-61.28-2195.06)      | 2451.18<br>(-195.22-7036.38)      | 230.12<br>(190.13-282.09) | 18.09<br>(-1.49-53.90)  | 29.87<br>(-2.34-87.70)  | 1.66<br>(1.63-1.69) |
| Malaysia                         | 2799.27<br>(-231.42-7931.38)    | 12581.44<br>(-1160.81-34309.88)   | 349.45<br>(309.38-421.94) | 27.15<br>(-2.20-78.47)  | 41.60<br>(-3.79-113.86) | 1.42<br>(1.37-1.48) |
| Maldives                         | 21.79<br>(-1.73-63.65)          | 156.89<br>(-14.81-421.95)         | 619.88<br>(535.93-775.40) | 19.65<br>(-1.55-58.20)  | 36.93<br>(-3.36-102.45) | 2.25<br>(2.16-2.34) |
| Mali                             | 941.78<br>(-74.07-2748.73)      | 2880.60<br>(-222.12-8331.50)      | 205.87<br>(171.89-251.45) | 21.82<br>(-1.66-64.42)  | 29.32<br>(-2.21-85.50)  | 0.96<br>(0.90-1.01) |
| Malta                            | 192.01<br>(-16.40-551.83)       | 543.51<br>(-52.03-1478.28)        | 183.06<br>(160.40-228.99) | 44.75<br>(-3.84-128.65) | 62.03<br>(-6.06-169.02) | 1.03<br>(0.92-1.13) |
| Marshall Islands                 | 9.21<br>(-1.01-24.56)           | 27.35<br>(-3.33-69.65)            | 196.95<br>(176.16-241.26) | 52.86<br>(-5.69-143.21) | 66.41<br>(-7.90-173.31) | 0.68<br>(0.65-0.71) |
| Mauritania                       | 413.67<br>(-35.36-1159.30)      | 1279.02<br>(-127.19-3448.80)      | 209.19<br>(185.28-253.65) | 40.29<br>(-3.40-112.76) | 55.95<br>(-5.46-151.97) | 1.03<br>(1.00-1.06) |
| Mauritius                        | 225.45<br>(-17.74-639.95)       | 838.78<br>(-78.05-2236.74)        | 272.05<br>(233.46-344.82) | 29.04<br>(-2.27-82.50)  | 44.52<br>(-4.11-119.00) | 1.42<br>(1.37-1.48) |
| Mexico                           | 24139.82<br>(-2393.80-64553.11) | 92604.38<br>(-10331.83-242413.59) | 283.62<br>(260.37-333.81) | 53.89<br>(-5.26-144.93) | 70.41<br>(-7.79-185.21) | 0.83<br>(0.81-0.85) |
| Micronesia (Federated States of) | 28.57<br>(-3.07-74.39)          | 61.76<br>(-7.28-153.57)           | 116.16<br>(98.59-154.99)  | 56.47<br>(-6.01-148.12) | 72.49<br>(-8.25-184.70) | 0.75<br>(0.67-0.83) |
| Monaco                           | 36.72<br>(-3.28-100.75)         | 59.30<br>(-5.81-158.69)           | 61.50<br>(51.21-80.33)    | 58.65<br>(-5.28-159.47) | 68.97<br>(-6.96-181.55) | 0.51<br>(0.49-0.53) |

|                          |                                 |                                  |                           |                         |                          |                     |
|--------------------------|---------------------------------|----------------------------------|---------------------------|-------------------------|--------------------------|---------------------|
| Mongolia                 | 319.43<br>(-29.24-898.16)       | 910.89<br>(-93.15-2441.78)       | 185.16<br>(166.18-217.14) | 30.02<br>(-2.70-85.09)  | 35.99<br>(-3.54-97.65)   | 0.49<br>(0.42-0.56) |
| Montenegro               | 292.20<br>(-28.33-784.19)       | 531.67<br>(-56.64-1391.66)       | 81.95<br>(69.95-109.50)   | 45.91<br>(-4.45-123.54) | 54.77<br>(-5.85-144.06)  | 0.61<br>(0.60-0.63) |
| Morocco                  | 5039.69<br>(-512.38-13769.44)   | 18399.78<br>(-1958.28-47936.73)  | 265.10<br>(239.12-306.49) | 34.30<br>(-3.44-94.14)  | 50.55<br>(-5.32-132.63)  | 1.28<br>(1.28-1.29) |
| Mozambique               | 1182.11<br>(-84.34-3494.09)     | 3763.49<br>(-278.25-10778.75)    | 218.37<br>(177.50-268.24) | 17.85<br>(-1.26-54.04)  | 29.62<br>(-2.14-85.52)   | 1.69<br>(1.64-1.75) |
| Myanmar                  | 3891.67<br>(-287.30-11575.36)   | 13098.03<br>(-1048.53-37651.60)  | 236.57<br>(199.92-288.38) | 15.33<br>(-1.12-46.08)  | 24.23<br>(-1.89-69.44)   | 1.56<br>(1.53-1.59) |
| Namibia                  | 203.18<br>(-15.27-621.69)       | 718.05<br>(-58.50-2003.04)       | 253.40<br>(211.82-325.50) | 29.98<br>(-2.25-91.76)  | 48.73<br>(-3.90-137.61)  | 1.58<br>(1.52-1.63) |
| Nauru                    | 3.26<br>(-0.38-8.28)            | 5.13<br>(-0.69-12.63)            | 57.51<br>(46.55-81.40)    | 60.52<br>(-6.86-158.09) | 78.18<br>(-10.12-196.07) | 0.76<br>(0.74-0.79) |
| Nepal                    | 1417.14<br>(-98.56-4300.57)     | 6716.84<br>(-519.61-19291.67)    | 373.97<br>(305.71-477.61) | 12.91<br>(-0.89-39.29)  | 26.48<br>(-2.02-76.00)   | 2.54<br>(2.46-2.62) |
| Netherlands              | 9817.22<br>(-941.33-26899.55)   | 20176.66<br>(-2035.50-55122.77)  | 105.52<br>(91.77-125.84)  | 50.71<br>(-4.89-138.00) | 62.38<br>(-6.38-169.82)  | 0.67<br>(0.66-0.69) |
| New Zealand              | 2162.90<br>(-207.01-5892.24)    | 5873.33<br>(-643.53-15756.39)    | 171.55<br>(151.77-206.37) | 56.43<br>(-5.42-152.81) | 73.84<br>(-8.13-198.75)  | 0.90<br>(0.87-0.94) |
| Nicaragua                | 815.19<br>(-80.46-2206.15)      | 3406.83<br>(-391.14-9003.38)     | 317.92<br>(284.70-383.16) | 50.88<br>(-4.95-138.18) | 66.65<br>(-7.64-175.91)  | 0.88<br>(0.84-0.91) |
| Niger                    | 669.05<br>(-51.27-1930.05)      | 2550.96<br>(-190.66-7493.79)     | 281.28<br>(237.03-339.62) | 21.54<br>(-1.62-63.80)  | 27.69<br>(-2.04-81.14)   | 0.80<br>(0.79-0.81) |
| Nigeria                  | 12836.06<br>(-1032.21-37755.23) | 45180.88<br>(-4030.18-125193.03) | 251.98<br>(222.51-300.65) | 27.83<br>(-2.21-81.46)  | 44.76<br>(-3.90-125.39)  | 1.52<br>(1.42-1.61) |
| Niue                     | 1.25<br>(-0.13-3.30)            | 1.73<br>(-0.19-4.42)             | 38.44<br>(27.06-62.01)    | 59.07<br>(-6.06-156.26) | 77.94<br>(-8.65-200.36)  | 0.88<br>(0.82-0.94) |
| North Macedonia          | 803.25<br>(-79.30-2138.56)      | 1684.74<br>(-173.28-4593.61)     | 109.74<br>(96.08-137.34)  | 41.54<br>(-4.05-111.25) | 50.06<br>(-5.12-136.36)  | 0.64<br>(0.63-0.65) |
| Northern Mariana Islands | 14.62<br>(-1.62-38.17)          | 48.41<br>(-5.89-120.81)          | 231.07<br>(203.17-288.74) | 62.79<br>(-6.89-168.27) | 79.13<br>(-9.30-200.44)  | 0.68<br>(0.60-0.77) |
| Norway                   | 2845.12<br>(-241.23-8088.05)    | 5117.09<br>(-471.49-14106.03)    | 79.86<br>(71.78-95.79)    | 45.65<br>(-3.92-127.42) | 55.68<br>(-5.16-152.58)  | 0.62<br>(0.61-0.64) |
| Oman                     | 271.16<br>(-24.91-754.87)       | 1703.50<br>(-200.10-4273.71)     | 528.23<br>(436.04-747.66) | 34.56<br>(-3.08-97.50)  | 64.59<br>(-7.44-164.98)  | 2.17<br>(2.12-2.21) |
| Pakistan                 | 10838.33<br>(-884.91-31199.65)  | 45963.13<br>(-3977.31-131671.44) | 324.08<br>(279.15-382.65) | 18.08<br>(-1.46-52.29)  | 33.22<br>(-2.80-97.90)   | 2.29<br>(2.16-2.42) |
| Palau                    | 6.41<br>(-0.67-16.87)           | 20.27<br>(-2.46-51.33)           | 216.24<br>(194.01-266.41) | 62.08<br>(-6.43-164.77) | 77.45<br>(-9.15-197.81)  | 0.65<br>(0.59-0.71) |
| Palestine                | 421.98<br>(-44.56-1128.89)      | 1730.44<br>(-214.73-4315.89)     | 310.07<br>(275.25-378.32) | 47.38<br>(-4.92-127.20) | 60.89<br>(-7.39-153.56)  | 0.78<br>(0.76-0.80) |
| Panama                   | 714.39<br>(-63.77-1974.79)      | 2968.89<br>(-314.70-7934.28)     | 315.58<br>(278.47-385.84) | 47.79<br>(-4.28-132.27) | 67.16<br>(-7.13-179.64)  | 1.09<br>(1.06-1.11) |
| Papua New Guinea         | 653.67<br>(-56.35-1851.87)      | 2531.08<br>(-245.05-6938.27)     | 287.21<br>(257.65-331.98) | 30.75<br>(-2.61-87.80)  | 40.11<br>(-3.73-111.39)  | 0.81<br>(0.76-0.87) |
| Paraguay                 | 1101.74<br>(-107.26-3044.14)    | 3795.98<br>(-421.24-10158.97)    | 244.54<br>(221.25-294.14) | 48.45<br>(-4.68-134.06) | 63.13<br>(-6.95-169.30)  | 0.89<br>(0.87-0.90) |

|                                  |                                  |                                    |                              |                         |                         |                     |
|----------------------------------|----------------------------------|------------------------------------|------------------------------|-------------------------|-------------------------|---------------------|
| Peru                             | 5697.47<br>(-541.75-15578.31)    | 21692.96<br>(-2363.27-58152.69)    | 280.75<br>(254.73-324.35)    | 45.76<br>(-4.31-125.96) | 63.39<br>(-6.87-170.68) | 1.08<br>(1.05-1.11) |
| Philippines                      | 5555.88<br>(-405.72-16620.35)    | 24951.04<br>(-1881.59-72911.26)    | 349.09<br>(313.32-393.15)    | 16.78<br>(-1.21-51.03)  | 27.60<br>(-2.05-80.96)  | 1.60<br>(1.51-1.70) |
| Poland                           | 17928.88<br>(-1668.40-48391.68)  | 34301.95<br>(-3582.63-92178.82)    | 91.32<br>(82.62-109.79)      | 41.03<br>(-3.83-110.90) | 50.33<br>(-5.29-135.38) | 0.67<br>(0.65-0.69) |
| Portugal                         | 6494.46<br>(-596.40-18164.12)    | 13691.06<br>(-1407.54-36078.99)    | 110.81<br>(95.90-136.33)     | 47.07<br>(-4.34-131.62) | 62.63<br>(-6.52-163.43) | 0.83<br>(0.76-0.90) |
| Puerto Rico                      | 2292.96<br>(-226.41-6108.45)     | 5016.58<br>(-546.27-13383.98)      | 118.78<br>(102.79-145.39)    | 63.69<br>(-6.31-169.65) | 80.42<br>(-8.98-211.60) | 0.79<br>(0.74-0.84) |
| Qatar                            | 89.18<br>(-10.09-232.69)         | 1203.76<br>(-154.75-2986.09)       | 1249.86<br>(1112.50-1605.70) | 52.04<br>(-5.60-140.26) | 72.47<br>(-8.93-186.97) | 1.03<br>(1.01-1.06) |
| Republic of Korea                | 12437.25<br>(-1119.89-35321.23)  | 55348.93<br>(-4640.22-164506.70)   | 345.03<br>(283.70-426.03)    | 39.32<br>(-3.52-111.86) | 58.71<br>(-4.93-174.25) | 1.51<br>(1.36-1.65) |
| Republic of Moldova              | 1945.57<br>(-185.45-5300.20)     | 3346.23<br>(-358.54-8865.00)       | 71.99<br>(58.60-98.51)       | 43.47<br>(-4.09-119.38) | 56.97<br>(-6.12-150.11) | 0.94<br>(0.92-0.97) |
| Romania                          | 11260.33<br>(-955.76-30938.42)   | 17568.05<br>(-1706.78-47655.83)    | 56.02<br>(45.26-77.98)       | 39.71<br>(-3.36-109.58) | 50.22<br>(-4.92-136.17) | 0.78<br>(0.76-0.81) |
| Russian Federation               | 76961.79<br>(-7251.91-211642.71) | 130796.75<br>(-13323.59-344632.60) | 69.95<br>(59.22-94.91)       | 42.33<br>(-3.95-116.94) | 55.47<br>(-5.68-146.27) | 0.94<br>(0.92-0.97) |
| Rwanda                           | 512.22<br>(-39.33-1483.40)       | 1877.73<br>(-157.86-5585.08)       | 266.58<br>(222.10-316.57)    | 16.98<br>(-1.29-50.03)  | 26.71<br>(-2.20-81.65)  | 1.47<br>(1.42-1.53) |
| Saint Kitts and Nevis            | 17.16<br>(-1.53-49.05)           | 52.04<br>(-5.67-135.21)            | 203.21<br>(173.70-260.77)    | 49.46<br>(-4.48-138.73) | 68.31<br>(-7.26-179.06) | 1.06<br>(1.03-1.09) |
| Saint Lucia                      | 38.01<br>(-3.46-105.89)          | 151.18<br>(-15.01-419.76)          | 297.72<br>(264.10-359.11)    | 43.80<br>(-4.03-121.70) | 61.37<br>(-6.04-170.54) | 1.09<br>(1.06-1.12) |
| Saint Vincent and the Grenadines | 26.45<br>(-2.15-77.73)           | 80.37<br>(-7.50-222.86)            | 203.81<br>(176.38-248.15)    | 37.95<br>(-3.08-111.04) | 54.96<br>(-5.09-152.96) | 1.26<br>(1.23-1.28) |
| Samoa                            | 58.83<br>(-7.01-146.56)          | 119.68<br>(-15.39-300.90)          | 103.44<br>(91.53-130.78)     | 64.44<br>(-7.55-162.54) | 76.89<br>(-9.70-194.25) | 0.50<br>(0.45-0.56) |
| San Marino                       | 18.27<br>(-1.64-49.83)           | 43.64<br>(-4.43-117.23)            | 138.82<br>(125.29-167.39)    | 54.48<br>(-4.93-148.01) | 66.08<br>(-6.86-175.43) | 0.61<br>(0.58-0.65) |
| Sao Tome and Principe            | 22.96<br>(-2.02-65.56)           | 62.54<br>(-6.12-170.31)            | 172.40<br>(151.12-211.78)    | 34.79<br>(-3.03-99.69)  | 50.28<br>(-4.81-139.87) | 1.20<br>(1.18-1.22) |
| Saudi Arabia                     | 2885.24<br>(-293.92-7701.86)     | 17739.35<br>(-2154.16-43804.17)    | 514.83<br>(436.44-704.53)    | 44.23<br>(-4.49-120.77) | 69.65<br>(-8.25-175.77) | 1.46<br>(1.40-1.52) |
| Senegal                          | 1016.22<br>(-83.44-2916.14)      | 3402.04<br>(-289.61-9534.57)       | 234.77<br>(207.33-275.15)    | 29.66<br>(-2.40-85.75)  | 40.50<br>(-3.39-114.50) | 0.96<br>(0.93-0.99) |
| Serbia                           | 4795.66<br>(-467.58-12888.04)    | 8235.64<br>(-877.79-22029.75)      | 71.73<br>(57.78-97.88)       | 40.65<br>(-3.92-110.37) | 52.89<br>(-5.67-141.55) | 0.90<br>(0.88-0.91) |
| Seychelles                       | 20.06<br>(-1.88-55.81)           | 66.20<br>(-7.70-174.93)            | 230.01<br>(195.66-302.31)    | 36.43<br>(-3.45-100.76) | 51.75<br>(-5.87-137.53) | 1.12<br>(1.07-1.17) |
| Sierra Leone                     | 512.88<br>(-38.55-1540.81)       | 1450.69<br>(-116.67-4151.87)       | 182.85<br>(154.22-217.02)    | 24.52<br>(-1.83-73.88)  | 35.29<br>(-2.79-103.30) | 1.14<br>(1.09-1.20) |
| Singapore                        | 905.81<br>(-71.00-2631.36)       | 5876.21<br>(-470.88-16837.44)      | 548.72<br>(457.29-655.11)    | 37.74<br>(-2.93-109.44) | 66.50<br>(-5.32-190.31) | 1.78<br>(1.69-1.87) |
| Slovakia                         | 2730.36<br>(-274.89-7384.77)     | 4952.39<br>(-499.21-13168.75)      | 81.38<br>(71.44-102.11)      | 46.03<br>(-4.62-124.56) | 53.52<br>(-5.43-142.65) | 0.46<br>(0.44-0.48) |

|                               |                                 |                                  |                           |                         |                          |                     |
|-------------------------------|---------------------------------|----------------------------------|---------------------------|-------------------------|--------------------------|---------------------|
| Slovenia                      | 1079.19<br>(-104.30-2935.84)    | 2140.66<br>(-214.78-5687.59)     | 98.36<br>(85.05-125.60)   | 43.85<br>(-4.23-119.22) | 52.71<br>(-5.39-140.53)  | 0.62<br>(0.61-0.64) |
| Solomon Islands               | 61.99<br>(-5.22-175.17)         | 215.98<br>(-22.38-585.94)        | 248.40<br>(220.97-293.37) | 38.94<br>(-3.25-111.10) | 52.86<br>(-5.34-145.63)  | 0.94<br>(0.87-1.00) |
| Somalia                       | 522.88<br>(-38.50-1451.84)      | 1861.66<br>(-143.48-5165.20)     | 256.04<br>(216.18-306.86) | 17.80<br>(-1.29-51.75)  | 25.26<br>(-1.94-70.83)   | 1.16<br>(1.12-1.19) |
| South Africa                  | 10066.71<br>(-923.95-27484.45)  | 30343.35<br>(-3174.26-79888.13)  | 201.42<br>(182.52-243.93) | 47.36<br>(-4.31-130.59) | 62.36<br>(-6.47-165.52)  | 0.90<br>(0.89-0.91) |
| South Sudan                   | 354.52<br>(-27.80-1069.01)      | 856.48<br>(-65.04-2507.67)       | 141.59<br>(107.16-183.32) | 13.34<br>(-1.04-40.31)  | 18.78<br>(-1.40-56.15)   | 1.12<br>(1.07-1.17) |
| Spain                         | 29108.32<br>(-2901.55-80742.64) | 60552.08<br>(-6314.33-163332.96) | 108.02<br>(93.23-132.67)  | 54.54<br>(-5.45-150.74) | 68.45<br>(-7.21-184.80)  | 0.64<br>(0.57-0.71) |
| Sri Lanka                     | 2277.36<br>(-161.50-6696.64)    | 8698.18<br>(-651.54-25624.59)    | 281.94<br>(239.83-342.98) | 19.21<br>(-1.35-56.59)  | 31.42<br>(-2.34-92.02)   | 1.61<br>(1.56-1.66) |
| Sudan                         | 3118.83<br>(-261.89-8799.56)    | 11290.05<br>(-1192.96-29891.89)  | 262.00<br>(223.11-337.28) | 32.17<br>(-2.67-91.48)  | 52.16<br>(-5.43-140.93)  | 1.60<br>(1.56-1.64) |
| Suriname                      | 103.85<br>(-9.19-293.69)        | 367.00<br>(-34.50-999.62)        | 253.39<br>(224.68-303.19) | 38.69<br>(-3.36-110.06) | 55.59<br>(-5.17-152.23)  | 1.20<br>(1.18-1.21) |
| Sweden                        | 5338.42<br>(-490.40-15425.50)   | 9375.08<br>(-917.41-26347.43)    | 75.62<br>(64.76-93.46)    | 38.54<br>(-3.65-111.04) | 49.64<br>(-4.97-136.35)  | 0.76<br>(0.70-0.83) |
| Switzerland                   | 4568.32<br>(-384.43-12923.63)   | 8870.31<br>(-759.91-24454.31)    | 94.17<br>(83.87-112.17)   | 46.25<br>(-3.91-130.37) | 53.93<br>(-4.70-146.77)  | 0.52<br>(0.49-0.54) |
| Syrian Arab Republic          | 2408.11<br>(-239.57-6466.60)    | 9377.63<br>(-1179.31-24199.07)   | 289.42<br>(246.72-393.25) | 43.54<br>(-4.30-118.04) | 64.06<br>(-7.84-166.35)  | 1.25<br>(1.21-1.28) |
| Taiwan<br>(Province of China) | 6017.06<br>(-515.35-17446.13)   | 25633.00<br>(-2512.24-73337.89)  | 326.01<br>(282.09-393.17) | 35.72<br>(-3.03-104.29) | 62.39<br>(-6.13-177.95)  | 1.89<br>(1.85-1.93) |
| Tajikistan                    | 855.99<br>(-78.65-2398.17)      | 2293.66<br>(-245.97-6111.68)     | 167.95<br>(148.17-204.48) | 31.01<br>(-2.79-87.30)  | 36.04<br>(-3.72-97.33)   | 0.48<br>(0.46-0.49) |
| Thailand                      | 8183.62<br>(-655.53-23833.08)   | 45842.93<br>(-3995.38-130751.28) | 460.18<br>(396.66-567.62) | 20.34<br>(-1.61-59.37)  | 41.57<br>(-3.64-118.83)  | 2.44<br>(2.36-2.52) |
| Timor-Leste                   | 27.22<br>(-2.33-83.03)          | 122.83<br>(-8.07-375.94)         | 351.21<br>(251.06-464.21) | 7.80<br>(-0.68-23.49)   | 13.66<br>(-0.90-42.16)   | 1.94<br>(1.86-2.02) |
| Togo                          | 356.05<br>(-27.10-1013.54)      | 1741.64<br>(-148.13-4916.40)     | 389.16<br>(340.29-462.00) | 26.36<br>(-1.99-75.83)  | 40.25<br>(-3.36-115.80)  | 1.34<br>(1.32-1.36) |
| Tokelau                       | 0.71<br>(-0.07-1.88)            | 1.08<br>(-0.12-2.73)             | 51.31<br>(37.72-76.84)    | 53.91<br>(-5.37-141.80) | 73.19<br>(-8.46-185.55)  | 0.97<br>(0.91-1.03) |
| Tonga                         | 39.08<br>(-4.24-101.12)         | 68.16<br>(-8.68-171.84)          | 74.44<br>(62.47-100.54)   | 65.41<br>(-6.98-170.61) | 81.98<br>(-10.33-208.12) | 0.64<br>(0.55-0.74) |
| Trinidad and Tobago           | 440.50<br>(-39.27-1203.77)      | 1322.86<br>(-147.25-3505.19)     | 200.31<br>(175.06-246.23) | 51.49<br>(-4.58-141.32) | 67.75<br>(-7.51-179.68)  | 0.94<br>(0.92-0.96) |
| Tunisia                       | 1890.37<br>(-180.83-5379.22)    | 7661.54<br>(-870.99-20154.94)    | 305.29<br>(265.99-385.29) | 35.81<br>(-3.37-102.52) | 55.37<br>(-6.23-146.02)  | 1.44<br>(1.43-1.45) |
| Turkmenistan                  | 659.87<br>(-64.69-1777.85)      | 1735.18<br>(-188.26-4615.29)     | 272.74<br>(238.94-342.74) | 33.99<br>(-3.29-93.44)  | 40.74<br>(-4.28-109.40)  | 0.60<br>(0.59-0.62) |
| Tuvalu                        | 3.74<br>(-0.37-10.06)           | 7.69<br>(-0.90-19.50)            | 162.96<br>(147.60-193.64) | 51.39<br>(-5.01-139.06) | 69.88<br>(-8.08-177.63)  | 0.97<br>(0.93-1.02) |
| Türkiye                       | 17314.65<br>(-1803.14-46614.56) | 64538.49<br>(-7666.24-166167.72) | 105.66<br>(87.51-148.18)  | 47.35<br>(-4.84-128.41) | 66.37<br>(-7.81-170.88)  | 1.08<br>(1.06-1.09) |

|                                    |                                    |                                     |                              |                         |                         |                     |
|------------------------------------|------------------------------------|-------------------------------------|------------------------------|-------------------------|-------------------------|---------------------|
| Uganda                             | 1257.62<br>(-91.53-3838.50)        | 4932.15<br>(-392.63-14125.16)       | 292.18<br>(250.26-343.53)    | 18.11<br>(-1.32-55.56)  | 29.49<br>(-2.32-86.13)  | 1.64<br>(1.61-1.68) |
| Ukraine                            | 31180.49<br>(-2841.72-86080.00)    | 40164.82<br>(-4198.73-106209.06)    | 28.81<br>(19.00-49.87)       | 43.49<br>(-3.90-120.17) | 53.06<br>(-5.59-139.96) | 0.70<br>(0.68-0.72) |
| United Arab Emirates               | 280.90<br>(-26.74-750.80)          | 5646.91<br>(-703.29-13808.40)       | 1910.27<br>(1631.65-2609.34) | 42.55<br>(-3.87-118.44) | 67.40<br>(-7.98-172.85) | 1.54<br>(1.51-1.58) |
| United Kingdom                     | 49970.25<br>(-4784.47-134657.20)   | 85642.93<br>(-9075.72-227898.56)    | 71.39<br>(63.69-86.33)       | 58.71<br>(-5.70-157.33) | 72.52<br>(-7.78-191.99) | 0.73<br>(0.64-0.81) |
| United Republic of Tanzania        | 2802.12<br>(-215.41-8539.46)       | 11035.99<br>(-904.55-30481.53)      | 293.84<br>(257.31-352.22)    | 24.31<br>(-1.85-73.48)  | 39.54<br>(-3.17-109.84) | 1.62<br>(1.59-1.65) |
| United States of America           | 212545.53<br>(-20945.25-569481.52) | 471042.37<br>(-52422.32-1227457.48) | 121.62<br>(105.93-156.48)    | 70.46<br>(-7.00-187.75) | 86.42<br>(-9.71-226.10) | 0.47<br>(0.32-0.63) |
| United States Virgin Islands       | 58.87<br>(-6.53-158.75)            | 132.02<br>(-13.69-354.31)           | 124.25<br>(108.77-154.48)    | 64.63<br>(-7.05-175.28) | 76.88<br>(-8.10-201.79) | 0.56<br>(0.53-0.59) |
| Uruguay                            | 2115.37<br>(-201.11-5758.92)       | 3674.16<br>(-361.92-9833.51)        | 73.69<br>(62.25-97.47)       | 55.42<br>(-5.29-150.96) | 72.47<br>(-7.23-194.18) | 0.87<br>(0.81-0.92) |
| Uzbekistan                         | 3918.45<br>(-386.39-10850.32)      | 11763.93<br>(-1315.39-31271.47)     | 200.22<br>(179.88-234.59)    | 33.99<br>(-3.30-94.60)  | 41.95<br>(-4.53-112.07) | 0.70<br>(0.69-0.72) |
| Vanuatu                            | 27.75<br>(-2.48-75.37)             | 107.02<br>(-10.94-281.03)           | 285.59<br>(256.54-335.60)    | 39.09<br>(-3.42-107.76) | 53.64<br>(-5.36-143.10) | 1.01<br>(0.98-1.05) |
| Venezuela (Bolivarian Republic of) | 5425.54<br>(-536.71-15006.16)      | 21452.69<br>(-2289.82-56063.77)     | 295.40<br>(264.63-359.88)    | 53.79<br>(-5.27-149.63) | 68.93<br>(-7.30-180.75) | 0.82<br>(0.81-0.83) |
| Viet Nam                           | 3314.29<br>(-260.62-10259.13)      | 19046.42<br>(-1336.42-57845.54)     | 474.68<br>(381.05-578.56)    | 8.15<br>(-0.64-25.23)   | 17.40<br>(-1.21-53.04)  | 2.82<br>(2.66-2.98) |
| Yemen                              | 1185.05<br>(-86.16-3462.16)        | 5929.07<br>(-498.51-16797.74)       | 400.32<br>(350.10-481.46)    | 22.38<br>(-1.60-66.24)  | 38.06<br>(-3.10-108.51) | 1.80<br>(1.74-1.87) |
| Zambia                             | 649.28<br>(-48.86-1891.26)         | 2943.04<br>(-260.27-8120.46)        | 353.28<br>(301.77-417.41)    | 20.79<br>(-1.57-61.10)  | 37.25<br>(-3.19-106.22) | 1.92<br>(1.90-1.93) |
| Zimbabwe                           | 1175.33<br>(-88.97-3526.78)        | 3284.37<br>(-285.25-8733.57)        | 179.44<br>(153.85-228.82)    | 26.85<br>(-2.01-80.93)  | 43.19<br>(-3.67-117.94) | 1.49<br>(1.43-1.55) |
